# Supplementary material for: Flavour compounds in tomato fruits: identification of loci and potential pathways affecting volatile composition
Source: PubMed Central journal article supplement — J Exp Bot. 2008 Dec 16;60(1):325–37. doi: 10.1093/jxb/ern294 (PMC3071775; doi:10.1093/jxb/ern294), 2008-12-16
Supplement: ern294_1.pdf [file ern294_1.pdf]

# **Flavour compounds in tomato fruits: identification of loci and potential pathways affecting volatile composition**

*Sandrine Mathieu, Valeriano Dal Cin, Zhangjun Fei, Hua Li, Peter Bliss, Mark G Taylor, Harry J Klee, and Denise Tieman*

## **Supplementary Material**

Supplementary Figure S1

Supplementary Table S1.

Combined values for all volatiles and lines. Lines highlighted in red or green were considered to be highly significantly different with an  $fdr < 0.05$ .

Supplementary Table S2

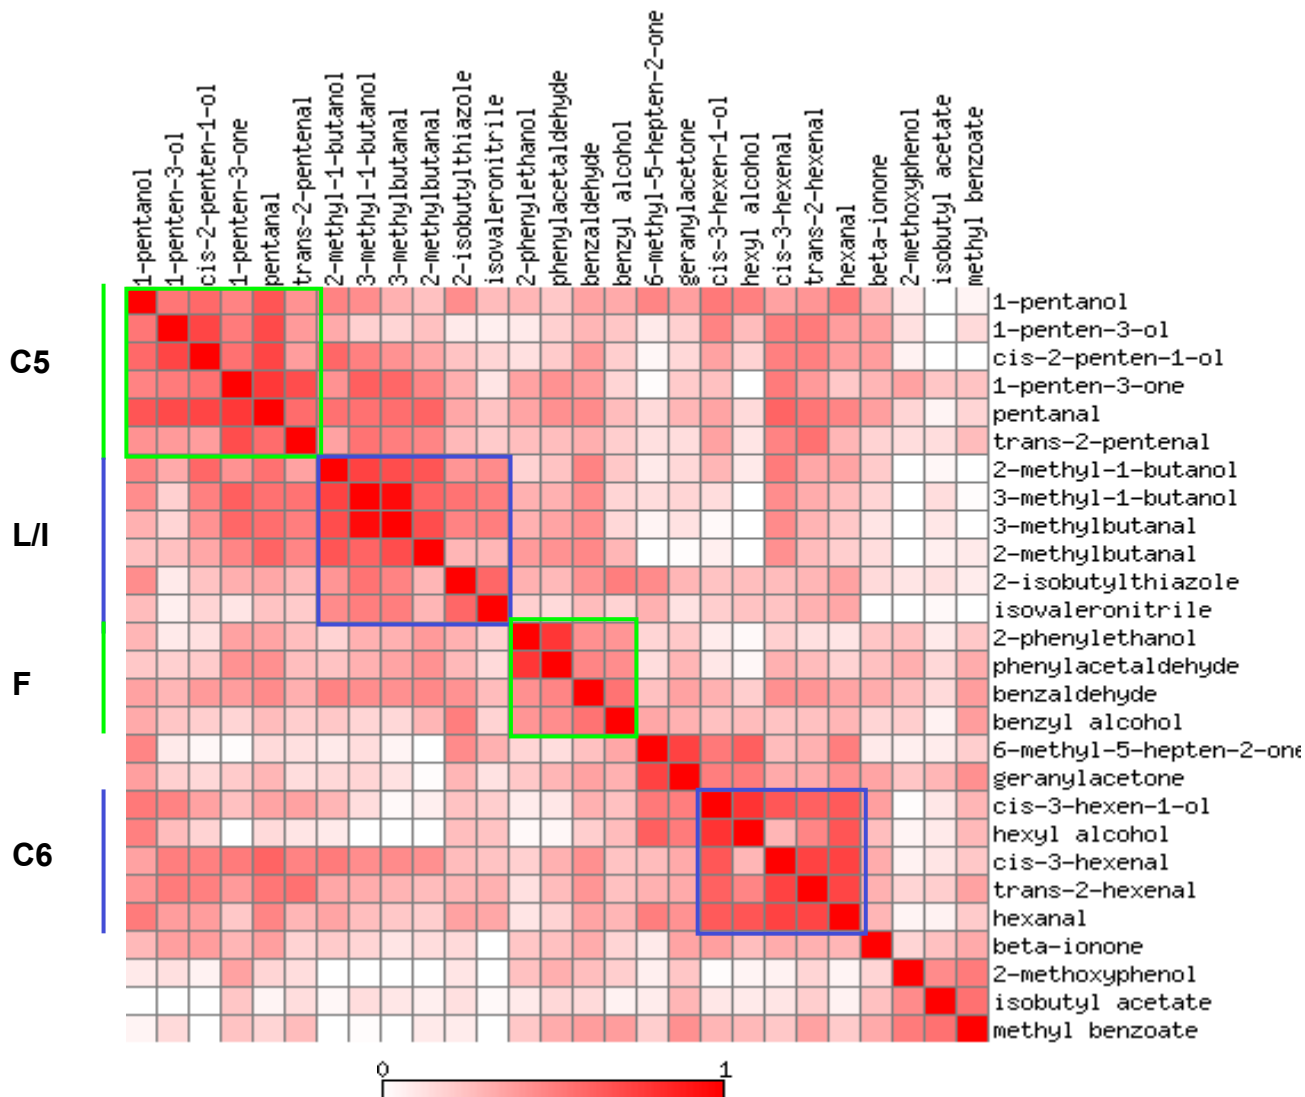

| metabolite             | line   | ratio (IL / LA4024) | p value     | FDR         |
|------------------------|--------|---------------------|-------------|-------------|
| 1-nitro-2-phenylethane | LA1777 | 1.4990              | 0.561150636 | 0.877064179 |
| 1-nitro-2-phenylethane | LA3913 | 1.3083              | 0.54237899  | 0.869848917 |
| 1-nitro-2-phenylethane | LA3914 | 3.6923              | 0.039413081 | 0.257293785 |
| 1-nitro-2-phenylethane | LA3915 | 0.8281              | 0.717021215 | 0.924993642 |
| 1-nitro-2-phenylethane | LA3916 | 2.5798              | 0.134800658 | 0.508254208 |
| 1-nitro-2-phenylethane | LA3917 | 0.6570              | 0.597009903 | 0.890833176 |
| 1-nitro-2-phenylethane | LA3918 | 1.1659              | 0.687237474 | 0.91782784  |
| 1-nitro-2-phenylethane | LA3919 | 2.0533              | 0.256690188 | 0.677080098 |
| 1-nitro-2-phenylethane | LA3920 | 1.6171              | 0.491538483 | 0.842165598 |
| 1-nitro-2-phenylethane | LA3921 | 0.5376              | 0.105985835 | 0.442888599 |
| 1-nitro-2-phenylethane | LA3922 | 1.0685              | 0.898409862 | 0.973435137 |
| 1-nitro-2-phenylethane | LA3923 | 1.5591              | 0.57779482  | 0.883142932 |
| 1-nitro-2-phenylethane | LA3924 | 4.4979              | 0.001016263 | 0.022464186 |
| 1-nitro-2-phenylethane | LA3925 | 1.5457              | 0.457543064 | 0.826457792 |
| 1-nitro-2-phenylethane | LA3926 | 0.6009              | 0.323976111 | 0.739106084 |
| 1-nitro-2-phenylethane | LA3927 | 1.1864              | 0.728573343 | 0.926656893 |
| 1-nitro-2-phenylethane | LA3929 | 0.6290              | 0.507078892 | 0.849759808 |
| 1-nitro-2-phenylethane | LA3930 | 3.1329              | 0.102537349 | 0.435828549 |
| 1-nitro-2-phenylethane | LA3931 | 0.8925              | 0.762212884 | 0.938912768 |
| 1-nitro-2-phenylethane | LA3932 | 0.3315              | 0.026300715 | 0.202498798 |
| 1-nitro-2-phenylethane | LA3933 | 0.3885              | 0.234799017 | 0.654576397 |
| 1-nitro-2-phenylethane | LA3934 | 1.8839              | 0.150949266 | 0.532762115 |
| 1-nitro-2-phenylethane | LA3935 | 0.7984              | 0.517380714 | 0.854488751 |
| 1-nitro-2-phenylethane | LA3936 | 0.4374              | 0.132206189 | 0.504661815 |
| 1-nitro-2-phenylethane | LA3937 | 1.2446              | 0.579070272 | 0.883886192 |
| 1-nitro-2-phenylethane | LA3938 | 1.6406              | 0.138679231 | 0.51471811  |
| 1-nitro-2-phenylethane | LA3939 | 1.6629              | 0.234877413 | 0.654576397 |
| 1-nitro-2-phenylethane | LA3940 | 1.3790              | 0.584402785 | 0.884407776 |
| 1-nitro-2-phenylethane | LA3941 | 1.4916              | 0.567256508 | 0.87990471  |
| 1-nitro-2-phenylethane | LA3942 | 1.3379              | 0.520402625 | 0.854488751 |
| 1-nitro-2-phenylethane | LA3943 | 0.4468              | 0.0274268   | 0.207224711 |
| 1-nitro-2-phenylethane | LA3944 | 1.8095              | 0.210192552 | 0.620240317 |
| 1-nitro-2-phenylethane | LA3945 | 0.8754              | 0.807751542 | 0.953768655 |
| 1-nitro-2-phenylethane | LA3946 | 0.2175              | 0.000866455 | 0.020553119 |
| 1-nitro-2-phenylethane | LA3947 | 1.0708              | 0.913977545 | 0.973773422 |
| 1-nitro-2-phenylethane | LA3948 | 0.3890              | 0.136706733 | 0.51202277  |
| 1-nitro-2-phenylethane | LA3949 | 0.2812              | 0.004199019 | 0.058940358 |
| 1-nitro-2-phenylethane | LA3950 | 0.7978              | 0.776457313 | 0.944905501 |
| 1-nitro-2-phenylethane | LA3952 | 3.2454              | 0.013160168 | 0.13160168  |
| 1-nitro-2-phenylethane | LA3953 | 1.0491              | 0.90414366  | 0.973435137 |
| 1-nitro-2-phenylethane | LA3954 | 1.8725              | 0.251331186 | 0.67390054  |
| 1-nitro-2-phenylethane | LA3955 | 0.6572              | 0.236731983 | 0.657350152 |
| 1-nitro-2-phenylethane | LA3956 | 0.5107              | 0.048669316 | 0.2901255   |
| 1-nitro-2-phenylethane | LA3957 | 0.5548              | 0.352357221 | 0.762755031 |
| 1-nitro-2-phenylethane | LA3958 | 0.8318              | 0.622123855 | 0.898077541 |
| 1-nitro-2-phenylethane | LA3959 | 1.2985              | 0.678889968 | 0.914681245 |
| 1-nitro-2-phenylethane | LA3960 | 1.5190              | 0.599178918 | 0.890833176 |
| 1-nitro-2-phenylethane | LA3961 | 1.4946              | 0.43993974  | 0.815452569 |
| 1-nitro-2-phenylethane | LA3962 | 0.2992              | 0.005150352 | 0.067931367 |
| 1-nitro-2-phenylethane | LA3963 | 1.3599              | 0.513135638 | 0.850963952 |
| 1-nitro-2-phenylethane | LA3964 | 0.2993              | 0.002021797 | 0.036607685 |
| 1-nitro-2-phenylethane | LA3965 | 0.3756              | 0.013698146 | 0.135438542 |
| 1-nitro-2-phenylethane | LA3966 | 0.3052              | 0.089882092 | 0.408108459 |
| 1-nitro-2-phenylethane | LA3967 | 1.5616              | 0.247284525 | 0.669223144 |
| 1-nitro-2-phenylethane | LA3968 | 1.0682              | 0.853754801 | 0.968539929 |
| 1-nitro-2-phenylethane | LA3969 | 2.1729              | 0.068300934 | 0.355044698 |
| 1-nitro-2-phenylethane | LA3970 | 1.1089              | 0.914462935 | 0.973773422 |
| 1-nitro-2-phenylethane | LA3971 | 1.9399              | 0.491082324 | 0.841855413 |
| 1-nitro-2-phenylethane | LA3976 | 0.8490              | 0.837404554 | 0.96155125  |
| 1-nitro-2-phenylethane | LA3977 | 2.7516              | 0.204771153 | 0.613420987 |
| 1-nitro-2-phenylethane | LA3978 | 0.4087              | 0.157090625 | 0.541765267 |

|                        |        |        |             |             |
|------------------------|--------|--------|-------------|-------------|
| 1-nitro-2-phenylethane | LA3979 | 0.0795 | 0.05894706  | 0.329106399 |
| 1-nitro-2-phenylethane | LA3980 | 2.8691 | 0.004624898 | 0.0626203   |
| 1-nitro-2-phenylethane | LA3981 | 2.1173 | 0.284946801 | 0.707153033 |
| 1-nitro-2-phenylethane | LA3983 | 2.1958 | 0.215069527 | 0.629772969 |
| 1-nitro-2-phenylethane | LA3984 | 3.5481 | 0.188357089 | 0.591151479 |
| 1-nitro-2-phenylethane | LA3985 | 1.3250 | 0.833805822 | 0.96155125  |
| 1-nitro-2-phenylethane | LA3986 | 2.5467 | 0.110891739 | 0.456700836 |
| 1-nitro-2-phenylethane | LA3988 | 0.9650 | 0.939572585 | 0.980590761 |
| 1-nitro-2-phenylethane | LA3989 | 1.2892 | 0.791793702 | 0.947951453 |
| 1-nitro-2-phenylethane | LA3990 | 0.8156 | 0.728606694 | 0.926656893 |
| 1-nitro-2-phenylethane | LA3992 | 0.3579 | 0.443205597 | 0.817485911 |
| 1-nitro-2-phenylethane | LA3993 | 0.7408 | 0.754722341 | 0.935627839 |
| 1-nitro-2-phenylethane | LA3994 | 2.1831 | 0.417207261 | 0.799348623 |
| 1-nitro-2-phenylethane | LA3995 | 0.6108 | 0.231803109 | 0.650173777 |
| 1-nitro-2-phenylethane | LA3996 | 2.5863 | 0.015333818 | 0.142186312 |
| 1-nitro-2-phenylethane | LA3997 | 2.4805 | 0.34521634  | 0.756164639 |
| 1-nitro-2-phenylethane | LA3998 | 0.8997 | 0.824987095 | 0.960073694 |
| 1-nitro-2-phenylethane | LA3999 | 0.6440 | 0.397959731 | 0.786664585 |
| 1-nitro-2-phenylethane | LA4000 | 1.2774 | 0.726119896 | 0.925600427 |
| 1-nitro-2-phenylethane | LA4001 | 1.3413 | 0.674352514 | 0.914322307 |
| 1-nitro-2-phenylethane | LA4002 | 0.8199 | 0.598941482 | 0.890833176 |
| 1-nitro-2-phenylethane | LA4003 | 0.6110 | 0.276892247 | 0.696851163 |
| 1-nitro-2-phenylethane | LA4004 | 0.5707 | 0.186519544 | 0.587795885 |
| 1-nitro-2-phenylethane | LA4005 | 1.8332 | 0.199881264 | 0.609515122 |
| 1-nitro-2-phenylethane | LA4006 | 2.0820 | 0.062026282 | 0.338827336 |
| 1-nitro-2-phenylethane | LA4007 | 1.0882 | 0.863850768 | 0.968539929 |
| 1-nitro-2-phenylethane | LA4008 | 2.1416 | 0.062682566 | 0.340690323 |
| 1-nitro-2-phenylethane | LA4009 | 0.1140 | 1.05801E-05 | 0.000585072 |
| 1-nitro-2-phenylethane | LA4010 | 0.6386 | 0.361780614 | 0.762755031 |
| 1-pentanol             | LA1777 | 0.3810 | 0.007462722 | 0.089202849 |
| 1-pentanol             | LA3913 | 0.5123 | 0.003416848 | 0.052442295 |
| 1-pentanol             | LA3914 | 0.7661 | 0.4156593   | 0.798943127 |
| 1-pentanol             | LA3915 | 0.8549 | 0.559853161 | 0.877064179 |
| 1-pentanol             | LA3916 | 0.5881 | 0.105024367 | 0.440239127 |
| 1-pentanol             | LA3917 | 0.3083 | 0.001147772 | 0.024560716 |
| 1-pentanol             | LA3918 | 1.0340 | 0.86515731  | 0.968539929 |
| 1-pentanol             | LA3919 | 1.0132 | 0.967975823 | 0.986677554 |
| 1-pentanol             | LA3920 | 0.6739 | 0.274552828 | 0.695223068 |
| 1-pentanol             | LA3921 | 0.9652 | 0.858108807 | 0.968539929 |
| 1-pentanol             | LA3922 | 0.8097 | 0.430881607 | 0.813917408 |
| 1-pentanol             | LA3923 | 0.4736 | 0.070117432 | 0.357598903 |
| 1-pentanol             | LA3924 | 1.4062 | 0.148222339 | 0.529241957 |
| 1-pentanol             | LA3925 | 1.2037 | 0.513730918 | 0.8511189   |
| 1-pentanol             | LA3926 | 1.2655 | 0.377414263 | 0.771818109 |
| 1-pentanol             | LA3927 | 1.8050 | 0.020496043 | 0.1723019   |
| 1-pentanol             | LA3929 | 0.6876 | 0.299796919 | 0.723299984 |
| 1-pentanol             | LA3930 | 1.1527 | 0.693917961 | 0.918420831 |
| 1-pentanol             | LA3931 | 0.8077 | 0.271470986 | 0.689951177 |
| 1-pentanol             | LA3932 | 0.8805 | 0.619693791 | 0.898077541 |
| 1-pentanol             | LA3933 | 0.7013 | 0.387991488 | 0.778908117 |
| 1-pentanol             | LA3934 | 1.6698 | 0.024575516 | 0.194162782 |
| 1-pentanol             | LA3935 | 1.7261 | 0.002455815 | 0.041398488 |
| 1-pentanol             | LA3936 | 1.0496 | 0.864386891 | 0.968539929 |
| 1-pentanol             | LA3937 | 1.3512 | 0.13994037  | 0.515924738 |
| 1-pentanol             | LA3938 | 1.3352 | 0.094394987 | 0.417116109 |
| 1-pentanol             | LA3939 | 1.0848 | 0.712912672 | 0.92436982  |
| 1-pentanol             | LA3940 | 0.9283 | 0.806370476 | 0.953295916 |
| 1-pentanol             | LA3941 | 0.6173 | 0.181746366 | 0.582349613 |
| 1-pentanol             | LA3942 | 0.7681 | 0.259800955 | 0.680060669 |
| 1-pentanol             | LA3943 | 1.1704 | 0.403894199 | 0.790227781 |
| 1-pentanol             | LA3944 | 0.9745 | 0.915729541 | 0.974315854 |
| 1-pentanol             | LA3945 | 0.9340 | 0.808945293 | 0.953768655 |

|               |        |        |             |             |
|---------------|--------|--------|-------------|-------------|
| 1-pentanol    | LA3946 | 0.5527 | 0.01210416  | 0.123052258 |
| 1-pentanol    | LA3947 | 1.1826 | 0.608291504 | 0.894460357 |
| 1-pentanol    | LA3948 | 1.5829 | 0.161183734 | 0.548846947 |
| 1-pentanol    | LA3949 | 1.1048 | 0.662618399 | 0.910059381 |
| 1-pentanol    | LA3950 | 1.6083 | 0.247798264 | 0.669223144 |
| 1-pentanol    | LA3952 | 1.4177 | 0.154289843 | 0.538957671 |
| 1-pentanol    | LA3953 | 1.1697 | 0.446124983 | 0.820447327 |
| 1-pentanol    | LA3954 | 1.2995 | 0.353809495 | 0.762755031 |
| 1-pentanol    | LA3955 | 1.0634 | 0.737435352 | 0.93112521  |
| 1-pentanol    | LA3956 | 0.9884 | 0.946669947 | 0.982875948 |
| 1-pentanol    | LA3957 | 0.7917 | 0.475434313 | 0.835148678 |
| 1-pentanol    | LA3958 | 0.9100 | 0.625077253 | 0.898316986 |
| 1-pentanol    | LA3959 | 1.0346 | 0.910276424 | 0.973773422 |
| 1-pentanol    | LA3960 | 1.7570 | 0.170502201 | 0.564039714 |
| 1-pentanol    | LA3961 | 0.9947 | 0.984098417 | 0.993564185 |
| 1-pentanol    | LA3962 | 0.8646 | 0.501068364 | 0.846175052 |
| 1-pentanol    | LA3963 | 1.9011 | 0.008311686 | 0.097075417 |
| 1-pentanol    | LA3964 | 0.9386 | 0.753078653 | 0.934654116 |
| 1-pentanol    | LA3965 | 1.3279 | 0.166568435 | 0.5558336   |
| 1-pentanol    | LA3966 | 1.1955 | 0.621141075 | 0.898077541 |
| 1-pentanol    | LA3967 | 1.3554 | 0.12670914  | 0.494553531 |
| 1-pentanol    | LA3968 | 1.1828 | 0.364312707 | 0.762755031 |
| 1-pentanol    | LA3969 | 1.6722 | 0.019513979 | 0.166330852 |
| 1-pentanol    | LA3970 | 0.9302 | 0.884311714 | 0.970586028 |
| 1-pentanol    | LA3971 | 0.8230 | 0.695277597 | 0.919007058 |
| 1-pentanol    | LA3976 | 0.6267 | 0.25711929  | 0.677080098 |
| 1-pentanol    | LA3977 | 0.7073 | 0.40096563  | 0.78853138  |
| 1-pentanol    | LA3978 | 0.9801 | 0.943395635 | 0.98245006  |
| 1-pentanol    | LA3979 | 1.5211 | 0.544545948 | 0.870032647 |
| 1-pentanol    | LA3980 | 1.1914 | 0.361391671 | 0.762755031 |
| 1-pentanol    | LA3981 | 1.8406 | 0.092494803 | 0.413409015 |
| 1-pentanol    | LA3983 | 1.3172 | 0.400524074 | 0.78816956  |
| 1-pentanol    | LA3984 | 1.5284 | 0.393603745 | 0.782614296 |
| 1-pentanol    | LA3985 | 1.4395 | 0.599232736 | 0.890833176 |
| 1-pentanol    | LA3986 | 0.6088 | 0.101452639 | 0.434797024 |
| 1-pentanol    | LA3988 | 1.6039 | 0.052054237 | 0.305145527 |
| 1-pentanol    | LA3989 | 1.9533 | 0.178348369 | 0.575681444 |
| 1-pentanol    | LA3990 | 0.9418 | 0.84349713  | 0.964537077 |
| 1-pentanol    | LA3992 | 0.8436 | 0.805940526 | 0.953295916 |
| 1-pentanol    | LA3993 | 0.7967 | 0.647005474 | 0.905529102 |
| 1-pentanol    | LA3994 | 1.5812 | 0.356896503 | 0.762755031 |
| 1-pentanol    | LA3995 | 0.6027 | 0.017628424 | 0.155904559 |
| 1-pentanol    | LA3996 | 1.4265 | 0.079147397 | 0.379609772 |
| 1-pentanol    | LA3997 | 1.2700 | 0.630756078 | 0.898759707 |
| 1-pentanol    | LA3998 | 0.9013 | 0.674075102 | 0.914322307 |
| 1-pentanol    | LA3999 | 0.4776 | 0.00610825  | 0.077557033 |
| 1-pentanol    | LA4000 | 0.8955 | 0.759762364 | 0.938800538 |
| 1-pentanol    | LA4001 | 0.5990 | 0.156125867 | 0.541661171 |
| 1-pentanol    | LA4002 | 1.5085 | 0.035331839 | 0.240698453 |
| 1-pentanol    | LA4003 | 0.9134 | 0.69862729  | 0.919304287 |
| 1-pentanol    | LA4004 | 1.4142 | 0.114289994 | 0.466303176 |
| 1-pentanol    | LA4005 | 1.0115 | 0.962486403 | 0.984553949 |
| 1-pentanol    | LA4006 | 0.9313 | 0.725581325 | 0.925600427 |
| 1-pentanol    | LA4007 | 1.8010 | 0.021064418 | 0.175155215 |
| 1-pentanol    | LA4008 | 1.5150 | 0.049390549 | 0.293110521 |
| 1-pentanol    | LA4009 | 1.0767 | 0.770197821 | 0.94243751  |
| 1-pentanol    | LA4010 | 0.5973 | 0.034958693 | 0.239851122 |
| 1-penten-3-ol | LA1777 | 2.8464 | 2.94968E-05 | 0.001253614 |
| 1-penten-3-ol | LA3913 | 0.7220 | 0.039088064 | 0.256965798 |
| 1-penten-3-ol | LA3914 | 1.2252 | 0.369767187 | 0.764518643 |
| 1-penten-3-ol | LA3915 | 1.0256 | 0.891743374 | 0.97315789  |
| 1-penten-3-ol | LA3916 | 0.6734 | 0.081053372 | 0.383937025 |

|               |        |        |             |             |
|---------------|--------|--------|-------------|-------------|
| 1-penten-3-ol | LA3917 | 0.6866 | 0.132266752 | 0.504661815 |
| 1-penten-3-ol | LA3918 | 1.0213 | 0.876889439 | 0.970384791 |
| 1-penten-3-ol | LA3919 | 0.7606 | 0.227488985 | 0.645149485 |
| 1-penten-3-ol | LA3920 | 0.3960 | 0.00022218  | 0.007310439 |
| 1-penten-3-ol | LA3921 | 1.0173 | 0.90065444  | 0.973435137 |
| 1-penten-3-ol | LA3922 | 0.9922 | 0.966389089 | 0.985984543 |
| 1-penten-3-ol | LA3923 | 0.6189 | 0.09281306  | 0.414005778 |
| 1-penten-3-ol | LA3924 | 0.7803 | 0.12835554  | 0.498436488 |
| 1-penten-3-ol | LA3925 | 1.0823 | 0.687339555 | 0.91782784  |
| 1-penten-3-ol | LA3926 | 1.5537 | 0.0171685   | 0.153558321 |
| 1-penten-3-ol | LA3927 | 1.1184 | 0.525029496 | 0.857305367 |
| 1-penten-3-ol | LA3929 | 1.0202 | 0.936062486 | 0.979392316 |
| 1-penten-3-ol | LA3930 | 1.2548 | 0.363747017 | 0.762755031 |
| 1-penten-3-ol | LA3931 | 0.9414 | 0.653242085 | 0.907895049 |
| 1-penten-3-ol | LA3932 | 1.1846 | 0.339853971 | 0.753356071 |
| 1-penten-3-ol | LA3933 | 1.2458 | 0.439792149 | 0.815452569 |
| 1-penten-3-ol | LA3934 | 1.3681 | 0.046975741 | 0.283522224 |
| 1-penten-3-ol | LA3935 | 1.5911 | 0.00020034  | 0.006736708 |
| 1-penten-3-ol | LA3936 | 0.9056 | 0.61320695  | 0.89790427  |
| 1-penten-3-ol | LA3937 | 1.6135 | 0.000724593 | 0.018617321 |
| 1-penten-3-ol | LA3938 | 1.2445 | 0.067454842 | 0.352840712 |
| 1-penten-3-ol | LA3939 | 1.4301 | 0.019579857 | 0.166428785 |
| 1-penten-3-ol | LA3940 | 1.0214 | 0.9195163   | 0.975991511 |
| 1-penten-3-ol | LA3941 | 0.8341 | 0.467959634 | 0.831478314 |
| 1-penten-3-ol | LA3942 | 0.8556 | 0.335488095 | 0.749338373 |
| 1-penten-3-ol | LA3943 | 1.1662 | 0.238537267 | 0.658182179 |
| 1-penten-3-ol | LA3944 | 0.8349 | 0.286149342 | 0.707714126 |
| 1-penten-3-ol | LA3945 | 2.4190 | 2.51746E-05 | 0.00108499  |
| 1-penten-3-ol | LA3946 | 1.8173 | 0.000445082 | 0.012848594 |
| 1-penten-3-ol | LA3947 | 1.6891 | 0.020824482 | 0.17415521  |
| 1-penten-3-ol | LA3948 | 1.0182 | 0.93659767  | 0.979490386 |
| 1-penten-3-ol | LA3949 | 0.9656 | 0.824572637 | 0.960073694 |
| 1-penten-3-ol | LA3950 | 1.4845 | 0.165014296 | 0.554017298 |
| 1-penten-3-ol | LA3952 | 0.9554 | 0.787517096 | 0.947232543 |
| 1-penten-3-ol | LA3953 | 0.8714 | 0.333466409 | 0.748099129 |
| 1-penten-3-ol | LA3954 | 1.5658 | 0.021983359 | 0.179384209 |
| 1-penten-3-ol | LA3955 | 1.0325 | 0.800995482 | 0.952232391 |
| 1-penten-3-ol | LA3956 | 1.0342 | 0.779918245 | 0.945579457 |
| 1-penten-3-ol | LA3957 | 0.8396 | 0.440253045 | 0.815452569 |
| 1-penten-3-ol | LA3958 | 1.0629 | 0.647614661 | 0.905529102 |
| 1-penten-3-ol | LA3959 | 1.1161 | 0.598645005 | 0.890833176 |
| 1-penten-3-ol | LA3960 | 2.3805 | 0.002359492 | 0.041022986 |
| 1-penten-3-ol | LA3961 | 1.0935 | 0.630965766 | 0.898759707 |
| 1-penten-3-ol | LA3962 | 0.8500 | 0.277464662 | 0.697381374 |
| 1-penten-3-ol | LA3963 | 1.9245 | 0.0001059   | 0.00376807  |
| 1-penten-3-ol | LA3964 | 1.0140 | 0.920221635 | 0.976379405 |
| 1-penten-3-ol | LA3965 | 1.0617 | 0.672616185 | 0.913734467 |
| 1-penten-3-ol | LA3966 | 1.0537 | 0.834131326 | 0.96155125  |
| 1-penten-3-ol | LA3967 | 1.5037 | 0.003131463 | 0.048640999 |
| 1-penten-3-ol | LA3968 | 1.2682 | 0.063685118 | 0.343092361 |
| 1-penten-3-ol | LA3969 | 1.1477 | 0.365048049 | 0.762755031 |
| 1-penten-3-ol | LA3970 | 1.1951 | 0.604480839 | 0.89289183  |
| 1-penten-3-ol | LA3971 | 1.3170 | 0.423526521 | 0.806435222 |
| 1-penten-3-ol | LA3976 | 1.0249 | 0.931240906 | 0.979385922 |
| 1-penten-3-ol | LA3977 | 0.9627 | 0.893951739 | 0.973435137 |
| 1-penten-3-ol | LA3978 | 0.8478 | 0.399132608 | 0.787456983 |
| 1-penten-3-ol | LA3979 | 1.0660 | 0.89382944  | 0.973435137 |
| 1-penten-3-ol | LA3980 | 1.1505 | 0.2910152   | 0.712336922 |
| 1-penten-3-ol | LA3981 | 2.0422 | 0.004505909 | 0.061553935 |
| 1-penten-3-ol | LA3983 | 1.1450 | 0.550372856 | 0.874302274 |
| 1-penten-3-ol | LA3984 | 1.0902 | 0.80169707  | 0.952293751 |
| 1-penten-3-ol | LA3985 | 1.1034 | 0.837463365 | 0.96155125  |

|                |        |        |             |             |
|----------------|--------|--------|-------------|-------------|
| 1-penten-3-ol  | LA3986 | 0.9703 | 0.885562073 | 0.970981353 |
| 1-penten-3-ol  | LA3988 | 0.9072 | 0.562475946 | 0.877064179 |
| 1-penten-3-ol  | LA3989 | 1.7368 | 0.108856305 | 0.449528061 |
| 1-penten-3-ol  | LA3990 | 0.8870 | 0.568199904 | 0.87990471  |
| 1-penten-3-ol  | LA3992 | 0.6586 | 0.38342686  | 0.777348871 |
| 1-penten-3-ol  | LA3993 | 0.9140 | 0.79334432  | 0.948294383 |
| 1-penten-3-ol  | LA3994 | 0.6129 | 0.154941349 | 0.539386266 |
| 1-penten-3-ol  | LA3995 | 0.6262 | 0.001545722 | 0.029811655 |
| 1-penten-3-ol  | LA3996 | 1.4065 | 0.014911534 | 0.13968405  |
| 1-penten-3-ol  | LA3997 | 1.3634 | 0.367702664 | 0.762827222 |
| 1-penten-3-ol  | LA3998 | 0.9299 | 0.670906827 | 0.913245058 |
| 1-penten-3-ol  | LA3999 | 0.6257 | 0.011899362 | 0.121779424 |
| 1-penten-3-ol  | LA4000 | 1.1103 | 0.71373012  | 0.924646133 |
| 1-penten-3-ol  | LA4001 | 0.8064 | 0.389147283 | 0.779823632 |
| 1-penten-3-ol  | LA4002 | 1.4695 | 0.004450289 | 0.061066746 |
| 1-penten-3-ol  | LA4003 | 0.8959 | 0.497280923 | 0.844594188 |
| 1-penten-3-ol  | LA4004 | 1.4279 | 0.019094822 | 0.165056936 |
| 1-penten-3-ol  | LA4005 | 0.8541 | 0.350558758 | 0.761980418 |
| 1-penten-3-ol  | LA4006 | 1.0815 | 0.576638505 | 0.882698262 |
| 1-penten-3-ol  | LA4007 | 1.7691 | 0.001249378 | 0.026185594 |
| 1-penten-3-ol  | LA4008 | 2.0055 | 2.25636E-06 | 0.000164392 |
| 1-penten-3-ol  | LA4009 | 1.7385 | 0.001646868 | 0.031107507 |
| 1-penten-3-ol  | LA4010 | 0.7610 | 0.106090635 | 0.442888599 |
| 1-penten-3-one | LA1777 | 3.1705 | 0.003271592 | 0.050560967 |
| 1-penten-3-one | LA3913 | 0.9129 | 0.712862398 | 0.92436982  |
| 1-penten-3-one | LA3914 | 2.7982 | 0.003919553 | 0.056219117 |
| 1-penten-3-one | LA3915 | 1.8596 | 0.034106279 | 0.237193668 |
| 1-penten-3-one | LA3916 | 0.7766 | 0.477268719 | 0.83597154  |
| 1-penten-3-one | LA3917 | 0.3469 | 0.007073391 | 0.086578306 |
| 1-penten-3-one | LA3918 | 1.0985 | 0.660903077 | 0.90958877  |
| 1-penten-3-one | LA3919 | 0.6644 | 0.297806562 | 0.720955759 |
| 1-penten-3-one | LA3920 | 0.2866 | 0.001504071 | 0.029693273 |
| 1-penten-3-one | LA3921 | 1.3635 | 0.150463172 | 0.532762115 |
| 1-penten-3-one | LA3922 | 1.4030 | 0.245393827 | 0.666878429 |
| 1-penten-3-one | LA3923 | 0.5217 | 0.146778365 | 0.528664453 |
| 1-penten-3-one | LA3924 | 1.5873 | 0.071589068 | 0.36012423  |
| 1-penten-3-one | LA3925 | 1.4810 | 0.203518688 | 0.612357114 |
| 1-penten-3-one | LA3926 | 1.7015 | 0.067103982 | 0.351606481 |
| 1-penten-3-one | LA3927 | 1.5330 | 0.122736521 | 0.486998691 |
| 1-penten-3-one | LA3929 | 1.7626 | 0.149114119 | 0.530568842 |
| 1-penten-3-one | LA3930 | 1.0737 | 0.856231451 | 0.968539929 |
| 1-penten-3-one | LA3931 | 0.7459 | 0.165118881 | 0.554017298 |
| 1-penten-3-one | LA3932 | 1.5869 | 0.097917061 | 0.426201672 |
| 1-penten-3-one | LA3933 | 1.1023 | 0.827380607 | 0.96011005  |
| 1-penten-3-one | LA3934 | 2.2083 | 0.001425107 | 0.028879652 |
| 1-penten-3-one | LA3935 | 2.1766 | 7.46767E-05 | 0.002856384 |
| 1-penten-3-one | LA3936 | 1.1633 | 0.623664959 | 0.898077541 |
| 1-penten-3-one | LA3937 | 2.1507 | 0.000574994 | 0.015851186 |
| 1-penten-3-one | LA3938 | 1.6146 | 0.010867275 | 0.115065265 |
| 1-penten-3-one | LA3939 | 1.2386 | 0.37343809  | 0.768800257 |
| 1-penten-3-one | LA3940 | 0.6534 | 0.197507645 | 0.607126492 |
| 1-penten-3-one | LA3941 | 1.5103 | 0.293766313 | 0.715135177 |
| 1-penten-3-one | LA3942 | 0.6243 | 0.064379749 | 0.344942366 |
| 1-penten-3-one | LA3943 | 1.2478 | 0.280191262 | 0.701521032 |
| 1-penten-3-one | LA3944 | 0.8862 | 0.649424105 | 0.907000347 |
| 1-penten-3-one | LA3945 | 1.3027 | 0.419621721 | 0.802526541 |
| 1-penten-3-one | LA3946 | 0.8981 | 0.686447663 | 0.91782784  |
| 1-penten-3-one | LA3947 | 2.1786 | 0.028863299 | 0.214559453 |
| 1-penten-3-one | LA3948 | 1.2658 | 0.50815053  | 0.850158897 |
| 1-penten-3-one | LA3949 | 1.2191 | 0.425002856 | 0.807342358 |
| 1-penten-3-one | LA3950 | 0.6629 | 0.357663131 | 0.762755031 |
| 1-penten-3-one | LA3952 | 0.9494 | 0.845412306 | 0.965539339 |



|                    |        |        |             |             |
|--------------------|--------|--------|-------------|-------------|
| 1-penten-3-one     | LA3953 | 0.9532 | 0.830236393 | 0.961227152 |
| 1-penten-3-one     | LA3954 | 1.8550 | 0.044471071 | 0.276027337 |
| 1-penten-3-one     | LA3955 | 1.0821 | 0.692017494 | 0.918070679 |
| 1-penten-3-one     | LA3956 | 1.1135 | 0.569344778 | 0.880786158 |
| 1-penten-3-one     | LA3957 | 1.0822 | 0.824230153 | 0.960073694 |
| 1-penten-3-one     | LA3958 | 1.2937 | 0.219931517 | 0.634940929 |
| 1-penten-3-one     | LA3959 | 0.9450 | 0.862987773 | 0.968539929 |
| 1-penten-3-one     | LA3960 | 3.5940 | 0.004297585 | 0.0597755   |
| 1-penten-3-one     | LA3961 | 1.5766 | 0.119580343 | 0.478947447 |
| 1-penten-3-one     | LA3962 | 0.9309 | 0.760786438 | 0.938912768 |
| 1-penten-3-one     | LA3963 | 2.1453 | 0.003942086 | 0.056219117 |
| 1-penten-3-one     | LA3964 | 1.1369 | 0.557611797 | 0.877064179 |
| 1-penten-3-one     | LA3965 | 1.1188 | 0.61427358  | 0.89790427  |
| 1-penten-3-one     | LA3966 | 1.2915 | 0.514874527 | 0.851884764 |
| 1-penten-3-one     | LA3967 | 1.1288 | 0.575429506 | 0.881996536 |
| 1-penten-3-one     | LA3968 | 1.7073 | 0.007964411 | 0.093379265 |
| 1-penten-3-one     | LA3969 | 1.0908 | 0.716004503 | 0.924993642 |
| 1-penten-3-one     | LA3970 | 1.2338 | 0.697542719 | 0.919304287 |
| 1-penten-3-one     | LA3971 | 2.0024 | 0.199188638 | 0.608908324 |
| 1-penten-3-one     | LA3976 | 0.3837 | 0.032829261 | 0.231598815 |
| 1-penten-3-one     | LA3977 | 0.4871 | 0.108820247 | 0.449528061 |
| 1-penten-3-one     | LA3978 | 1.4233 | 0.251376892 | 0.67390054  |
| 1-penten-3-one     | LA3979 | 1.2464 | 0.769756281 | 0.94243751  |
| 1-penten-3-one     | LA3980 | 1.2995 | 0.209209649 | 0.619791595 |
| 1-penten-3-one     | LA3981 | 1.2197 | 0.614266866 | 0.89790427  |
| 1-penten-3-one     | LA3983 | 1.1370 | 0.718628748 | 0.925212938 |
| 1-penten-3-one     | LA3984 | 0.9534 | 0.929640877 | 0.979385922 |
| 1-penten-3-one     | LA3985 | 0.5007 | 0.358783841 | 0.762755031 |
| 1-penten-3-one     | LA3986 | 0.5178 | 0.045789908 | 0.280509999 |
| 1-penten-3-one     | LA3988 | 0.9238 | 0.764189801 | 0.939204064 |
| 1-penten-3-one     | LA3989 | 1.8662 | 0.248620802 | 0.669223144 |
| 1-penten-3-one     | LA3990 | 0.7349 | 0.350703163 | 0.761980418 |
| 1-penten-3-one     | LA3992 | 0.9011 | 0.889925011 | 0.972213686 |
| 1-penten-3-one     | LA3993 | 0.6692 | 0.45661859  | 0.826457792 |
| 1-penten-3-one     | LA3994 | 0.6362 | 0.402856879 | 0.789846977 |
| 1-penten-3-one     | LA3995 | 1.2542 | 0.328041125 | 0.742514275 |
| 1-penten-3-one     | LA3996 | 1.4673 | 0.081301534 | 0.384517301 |
| 1-penten-3-one     | LA3997 | 1.3039 | 0.623507901 | 0.898077541 |
| 1-penten-3-one     | LA3998 | 1.2709 | 0.372086827 | 0.767708832 |
| 1-penten-3-one     | LA3999 | 1.4784 | 0.181358675 | 0.581716505 |
| 1-penten-3-one     | LA4000 | 0.7416 | 0.446419869 | 0.820447327 |
| 1-penten-3-one     | LA4001 | 1.3575 | 0.436386922 | 0.8142009   |
| 1-penten-3-one     | LA4002 | 2.0160 | 0.000986526 | 0.022107071 |
| 1-penten-3-one     | LA4003 | 1.2955 | 0.309133871 | 0.731297349 |
| 1-penten-3-one     | LA4004 | 2.1648 | 0.001242298 | 0.026185594 |
| 1-penten-3-one     | LA4005 | 1.0155 | 0.953678508 | 0.984234818 |
| 1-penten-3-one     | LA4006 | 0.8302 | 0.398955268 | 0.787456983 |
| 1-penten-3-one     | LA4007 | 2.0245 | 0.010997962 | 0.115648673 |
| 1-penten-3-one     | LA4008 | 2.9752 | 2.40821E-06 | 0.000171375 |
| 1-penten-3-one     | LA4009 | 1.9528 | 0.015209239 | 0.141459791 |
| 1-penten-3-one     | LA4010 | 0.5640 | 0.031102508 | 0.222889167 |
| 2-isobutylthiazole | LA1777 | 0.0538 | 5.99541E-11 | 1.67E-08    |
| 2-isobutylthiazole | LA3913 | 0.8357 | 0.519900248 | 0.854488751 |
| 2-isobutylthiazole | LA3914 | 1.3976 | 0.40331612  | 0.789846977 |
| 2-isobutylthiazole | LA3915 | 1.1662 | 0.640374406 | 0.901769757 |
| 2-isobutylthiazole | LA3916 | 1.2629 | 0.560022517 | 0.877064179 |
| 2-isobutylthiazole | LA3917 | 0.2232 | 0.000711585 | 0.018452967 |
| 2-isobutylthiazole | LA3918 | 0.6456 | 0.069687324 | 0.357157116 |
| 2-isobutylthiazole | LA3919 | 0.7430 | 0.458796935 | 0.826457792 |
| 2-isobutylthiazole | LA3920 | 0.8607 | 0.734222324 | 0.929863686 |
| 2-isobutylthiazole | LA3921 | 0.8214 | 0.417437614 | 0.799348623 |
| 2-isobutylthiazole | LA3922 | 0.5115 | 0.041179321 | 0.262518171 |



|                    |        |        |             |             |
|--------------------|--------|--------|-------------|-------------|
| 2-isobutylthiazole | LA3923 | 0.5112 | 0.183700643 | 0.582511884 |
| 2-isobutylthiazole | LA3924 | 1.4228 | 0.22153821  | 0.634940929 |
| 2-isobutylthiazole | LA3925 | 0.9991 | 0.997934269 | 0.999168573 |
| 2-isobutylthiazole | LA3926 | 0.6549 | 0.195007819 | 0.603360896 |
| 2-isobutylthiazole | LA3927 | 1.6675 | 0.100848746 | 0.433422981 |
| 2-isobutylthiazole | LA3929 | 0.7439 | 0.503178889 | 0.847755125 |
| 2-isobutylthiazole | LA3930 | 0.1896 | 0.000179825 | 0.006182747 |
| 2-isobutylthiazole | LA3931 | 0.2524 | 9.86225E-09 | 1.59E-06    |
| 2-isobutylthiazole | LA3932 | 0.6085 | 0.113665059 | 0.466240054 |
| 2-isobutylthiazole | LA3933 | 0.4796 | 0.1442514   | 0.523913352 |
| 2-isobutylthiazole | LA3934 | 2.0237 | 0.011588614 | 0.119397841 |
| 2-isobutylthiazole | LA3935 | 1.5805 | 0.037655321 | 0.250489744 |
| 2-isobutylthiazole | LA3936 | 1.1369 | 0.711648949 | 0.923910251 |
| 2-isobutylthiazole | LA3937 | 1.1969 | 0.471196335 | 0.834110248 |
| 2-isobutylthiazole | LA3938 | 2.9934 | 2.67135E-07 | 2.82E-05    |
| 2-isobutylthiazole | LA3939 | 1.0593 | 0.831469893 | 0.96155125  |
| 2-isobutylthiazole | LA3940 | 0.6464 | 0.240297895 | 0.661251402 |
| 2-isobutylthiazole | LA3941 | 0.6408 | 0.314019611 | 0.732830713 |
| 2-isobutylthiazole | LA3942 | 1.0771 | 0.795415504 | 0.948513004 |
| 2-isobutylthiazole | LA3943 | 0.7809 | 0.283762908 | 0.705373273 |
| 2-isobutylthiazole | LA3944 | 0.4946 | 0.018815121 | 0.163099916 |
| 2-isobutylthiazole | LA3945 | 0.8723 | 0.692777066 | 0.918070679 |
| 2-isobutylthiazole | LA3946 | 0.5331 | 0.029537582 | 0.216532921 |
| 2-isobutylthiazole | LA3947 | 1.1974 | 0.652753158 | 0.907895049 |
| 2-isobutylthiazole | LA3948 | 1.2189 | 0.621455517 | 0.898077541 |
| 2-isobutylthiazole | LA3949 | 0.6818 | 0.170734861 | 0.564199433 |
| 2-isobutylthiazole | LA3950 | 0.3729 | 0.050117941 | 0.296063512 |
| 2-isobutylthiazole | LA3952 | 0.8755 | 0.657205168 | 0.909477364 |
| 2-isobutylthiazole | LA3953 | 1.3239 | 0.265212006 | 0.682576622 |
| 2-isobutylthiazole | LA3954 | 1.4719 | 0.263577289 | 0.682357449 |
| 2-isobutylthiazole | LA3955 | 1.1605 | 0.506754402 | 0.849759808 |
| 2-isobutylthiazole | LA3956 | 0.7551 | 0.18675251  | 0.587924569 |
| 2-isobutylthiazole | LA3957 | 1.0522 | 0.898794864 | 0.973435137 |
| 2-isobutylthiazole | LA3958 | 1.2754 | 0.303292814 | 0.727332297 |
| 2-isobutylthiazole | LA3959 | 0.1993 | 1.39487E-05 | 0.000711384 |
| 2-isobutylthiazole | LA3960 | 0.6061 | 0.319644288 | 0.737202017 |
| 2-isobutylthiazole | LA3961 | 1.3312 | 0.384578707 | 0.777413561 |
| 2-isobutylthiazole | LA3962 | 1.1916 | 0.507582546 | 0.849975425 |
| 2-isobutylthiazole | LA3963 | 1.1523 | 0.633505794 | 0.899415917 |
| 2-isobutylthiazole | LA3964 | 1.4420 | 0.137578721 | 0.512154363 |
| 2-isobutylthiazole | LA3965 | 2.3668 | 0.000618793 | 0.016421833 |
| 2-isobutylthiazole | LA3966 | 1.9151 | 0.141869597 | 0.518663043 |
| 2-isobutylthiazole | LA3967 | 1.2595 | 0.343590577 | 0.755811393 |
| 2-isobutylthiazole | LA3968 | 1.5444 | 0.055173435 | 0.317948608 |
| 2-isobutylthiazole | LA3969 | 1.3606 | 0.252358432 | 0.67390054  |
| 2-isobutylthiazole | LA3970 | 0.7231 | 0.594131364 | 0.888328227 |
| 2-isobutylthiazole | LA3971 | 1.2570 | 0.706988066 | 0.92238941  |
| 2-isobutylthiazole | LA3976 | 0.5572 | 0.246514082 | 0.669223144 |
| 2-isobutylthiazole | LA3977 | 0.9087 | 0.849527805 | 0.966377354 |
| 2-isobutylthiazole | LA3978 | 0.6069 | 0.149448844 | 0.530970991 |
| 2-isobutylthiazole | LA3979 | 0.6016 | 0.548588398 | 0.872041817 |
| 2-isobutylthiazole | LA3980 | 3.0048 | 3.24586E-06 | 0.00021592  |
| 2-isobutylthiazole | LA3981 | 1.2016 | 0.678818469 | 0.914681245 |
| 2-isobutylthiazole | LA3983 | 1.1675 | 0.699293438 | 0.919304287 |
| 2-isobutylthiazole | LA3984 | 1.2327 | 0.73092479  | 0.928062181 |
| 2-isobutylthiazole | LA3985 | 1.1470 | 0.87152835  | 0.970384791 |
| 2-isobutylthiazole | LA3986 | 0.6943 | 0.324781076 | 0.740007515 |
| 2-isobutylthiazole | LA3988 | 1.5419 | 0.145453917 | 0.525488767 |
| 2-isobutylthiazole | LA3989 | 1.5758 | 0.454851742 | 0.825713894 |
| 2-isobutylthiazole | LA3990 | 0.7677 | 0.476647657 | 0.83584059  |
| 2-isobutylthiazole | LA3992 | 0.3913 | 0.268238075 | 0.687611501 |
| 2-isobutylthiazole | LA3993 | 0.7781 | 0.679448155 | 0.914699232 |

|                    |        |        |             |             |
|--------------------|--------|--------|-------------|-------------|
| 2-isobutylthiazole | LA3994 | 3.1861 | 0.057124883 | 0.32370767  |
| 2-isobutylthiazole | LA3995 | 0.5832 | 0.038811474 | 0.256507798 |
| 2-isobutylthiazole | LA3996 | 0.7250 | 0.193713437 | 0.602037609 |
| 2-isobutylthiazole | LA3997 | 1.2301 | 0.733539263 | 0.929691621 |
| 2-isobutylthiazole | LA3998 | 1.1864 | 0.571846025 | 0.881536692 |
| 2-isobutylthiazole | LA3999 | 0.8624 | 0.65273692  | 0.907895049 |
| 2-isobutylthiazole | LA4000 | 0.1412 | 1.07072E-05 | 0.000585072 |
| 2-isobutylthiazole | LA4001 | 0.4178 | 0.048551639 | 0.2901255   |
| 2-isobutylthiazole | LA4002 | 2.7538 | 2.4514E-05  | 0.001071612 |
| 2-isobutylthiazole | LA4003 | 0.4437 | 0.004651615 | 0.06270459  |
| 2-isobutylthiazole | LA4004 | 0.7074 | 0.197235107 | 0.607126492 |
| 2-isobutylthiazole | LA4005 | 0.6685 | 0.178050034 | 0.575325347 |
| 2-isobutylthiazole | LA4006 | 0.4026 | 0.000262702 | 0.008373626 |
| 2-isobutylthiazole | LA4007 | 1.5428 | 0.164326884 | 0.55317961  |
| 2-isobutylthiazole | LA4008 | 3.2654 | 5.37694E-06 | 0.000322616 |
| 2-isobutylthiazole | LA4009 | 0.6621 | 0.183484625 | 0.582511884 |
| 2-isobutylthiazole | LA4010 | 1.5121 | 0.16637714  | 0.555801363 |
| 2-methyl-1-butanol | LA1777 | 2.3783 | 0.0599355   | 0.332251141 |
| 2-methyl-1-butanol | LA3913 | 0.1743 | 9.44136E-09 | 1.59E-06    |
| 2-methyl-1-butanol | LA3914 | 0.5117 | 0.146782423 | 0.528664453 |
| 2-methyl-1-butanol | LA3915 | 0.4887 | 0.037482201 | 0.250426932 |
| 2-methyl-1-butanol | LA3916 | 0.3166 | 0.006085361 | 0.077557033 |
| 2-methyl-1-butanol | LA3917 | 0.3211 | 0.01392563  | 0.135708369 |
| 2-methyl-1-butanol | LA3918 | 2.0068 | 0.005775215 | 0.074566067 |
| 2-methyl-1-butanol | LA3919 | 0.7195 | 0.431940294 | 0.813917408 |
| 2-methyl-1-butanol | LA3920 | 0.7434 | 0.520503262 | 0.854488751 |
| 2-methyl-1-butanol | LA3921 | 0.7856 | 0.341064917 | 0.754299522 |
| 2-methyl-1-butanol | LA3922 | 1.1156 | 0.74947794  | 0.931898617 |
| 2-methyl-1-butanol | LA3923 | 2.1752 | 0.140529116 | 0.516849874 |
| 2-methyl-1-butanol | LA3924 | 1.1154 | 0.71696132  | 0.924993642 |
| 2-methyl-1-butanol | LA3925 | 0.8793 | 0.72301934  | 0.925212938 |
| 2-methyl-1-butanol | LA3926 | 2.2003 | 0.020937329 | 0.174572825 |
| 2-methyl-1-butanol | LA3927 | 2.1139 | 0.021578122 | 0.177975885 |
| 2-methyl-1-butanol | LA3929 | 0.3039 | 0.010015569 | 0.110480627 |
| 2-methyl-1-butanol | LA3930 | 1.4198 | 0.447714542 | 0.821346822 |
| 2-methyl-1-butanol | LA3931 | 1.5169 | 0.093472239 | 0.415734086 |
| 2-methyl-1-butanol | LA3932 | 0.3720 | 0.002623782 | 0.042706239 |
| 2-methyl-1-butanol | LA3933 | 0.6877 | 0.476117793 | 0.83584059  |
| 2-methyl-1-butanol | LA3934 | 1.3069 | 0.357922913 | 0.762755031 |
| 2-methyl-1-butanol | LA3935 | 2.5843 | 3.93659E-05 | 0.001627833 |
| 2-methyl-1-butanol | LA3936 | 1.2818 | 0.493440386 | 0.843121844 |
| 2-methyl-1-butanol | LA3937 | 1.8051 | 0.023597296 | 0.188040953 |
| 2-methyl-1-butanol | LA3938 | 4.6092 | 9.0312E-12  | 3.95E-09    |
| 2-methyl-1-butanol | LA3939 | 0.8506 | 0.566880266 | 0.87990471  |
| 2-methyl-1-butanol | LA3940 | 0.8614 | 0.700593986 | 0.919304287 |
| 2-methyl-1-butanol | LA3941 | 0.4820 | 0.11411736  | 0.466303176 |
| 2-methyl-1-butanol | LA3942 | 1.2918 | 0.392103189 | 0.782614296 |
| 2-methyl-1-butanol | LA3943 | 0.7836 | 0.311558223 | 0.732830713 |
| 2-methyl-1-butanol | LA3944 | 1.0730 | 0.82157415  | 0.960073694 |
| 2-methyl-1-butanol | LA3945 | 3.8779 | 0.000187022 | 0.006358748 |
| 2-methyl-1-butanol | LA3946 | 1.8128 | 0.048733499 | 0.2901255   |
| 2-methyl-1-butanol | LA3947 | 1.0679 | 0.875168759 | 0.970384791 |
| 2-methyl-1-butanol | LA3948 | 0.8233 | 0.642372705 | 0.903336616 |
| 2-methyl-1-butanol | LA3949 | 1.3293 | 0.329574273 | 0.743729554 |
| 2-methyl-1-butanol | LA3950 | 0.8257 | 0.715447074 | 0.924912567 |
| 2-methyl-1-butanol | LA3952 | 1.4558 | 0.230327785 | 0.648392845 |
| 2-methyl-1-butanol | LA3953 | 1.5995 | 0.074313485 | 0.366275063 |
| 2-methyl-1-butanol | LA3954 | 1.1063 | 0.779581127 | 0.945579457 |
| 2-methyl-1-butanol | LA3955 | 0.9886 | 0.960893979 | 0.984553949 |
| 2-methyl-1-butanol | LA3956 | 0.9620 | 0.861492181 | 0.968539929 |
| 2-methyl-1-butanol | LA3957 | 1.2341 | 0.615050431 | 0.89790427  |
| 2-methyl-1-butanol | LA3958 | 1.0523 | 0.836382425 | 0.96155125  |

|                       |        |        |             |             |
|-----------------------|--------|--------|-------------|-------------|
| 2-methyl-1-butanol    | LA3959 | 1.1513 | 0.714651341 | 0.924912567 |
| 2-methyl-1-butanol    | LA3960 | 0.7622 | 0.605245386 | 0.89289183  |
| 2-methyl-1-butanol    | LA3961 | 1.8142 | 0.083280213 | 0.3886885   |
| 2-methyl-1-butanol    | LA3962 | 0.6011 | 0.065778856 | 0.349450173 |
| 2-methyl-1-butanol    | LA3963 | 0.9402 | 0.842548926 | 0.963812977 |
| 2-methyl-1-butanol    | LA3964 | 1.5794 | 0.075940003 | 0.367755808 |
| 2-methyl-1-butanol    | LA3965 | 3.8561 | 3.21184E-07 | 3.14E-05    |
| 2-methyl-1-butanol    | LA3966 | 4.0595 | 0.002481615 | 0.041495857 |
| 2-methyl-1-butanol    | LA3967 | 1.1962 | 0.481318117 | 0.839221332 |
| 2-methyl-1-butanol    | LA3968 | 1.0280 | 0.906921676 | 0.973435137 |
| 2-methyl-1-butanol    | LA3969 | 1.9671 | 0.016205687 | 0.147587507 |
| 2-methyl-1-butanol    | LA3970 | 0.7276 | 0.616800462 | 0.89790427  |
| 2-methyl-1-butanol    | LA3971 | 1.8348 | 0.339700173 | 0.753356071 |
| 2-methyl-1-butanol    | LA3976 | 0.4865 | 0.171691949 | 0.564921897 |
| 2-methyl-1-butanol    | LA3977 | 0.5379 | 0.239424623 | 0.660035447 |
| 2-methyl-1-butanol    | LA3978 | 1.3219 | 0.440359486 | 0.815452569 |
| 2-methyl-1-butanol    | LA3979 | 2.2477 | 0.360037765 | 0.762755031 |
| 2-methyl-1-butanol    | LA3980 | 4.3706 | 2.72149E-09 | 4.90E-07    |
| 2-methyl-1-butanol    | LA3981 | 1.6300 | 0.291647268 | 0.712336922 |
| 2-methyl-1-butanol    | LA3983 | 1.4915 | 0.339995011 | 0.753356071 |
| 2-methyl-1-butanol    | LA3984 | 1.5281 | 0.504702393 | 0.848565562 |
| 2-methyl-1-butanol    | LA3985 | 0.4762 | 0.402426496 | 0.789846977 |
| 2-methyl-1-butanol    | LA3986 | 0.8309 | 0.632203696 | 0.899415917 |
| 2-methyl-1-butanol    | LA3988 | 2.7784 | 0.001037581 | 0.022517715 |
| 2-methyl-1-butanol    | LA3989 | 3.3037 | 0.060339113 | 0.333281021 |
| 2-methyl-1-butanol    | LA3990 | 0.9129 | 0.814302957 | 0.958297962 |
| 2-methyl-1-butanol    | LA3992 | 0.2996 | 0.173451153 | 0.56865703  |
| 2-methyl-1-butanol    | LA3993 | 0.5636 | 0.366106174 | 0.762755031 |
| 2-methyl-1-butanol    | LA3994 | 1.9385 | 0.297798234 | 0.720955759 |
| 2-methyl-1-butanol    | LA3995 | 0.3080 | 1.69873E-05 | 0.00085215  |
| 2-methyl-1-butanol    | LA3996 | 0.9511 | 0.846109088 | 0.965539339 |
| 2-methyl-1-butanol    | LA3997 | 2.0165 | 0.269958462 | 0.689488431 |
| 2-methyl-1-butanol    | LA3998 | 0.7090 | 0.2761822   | 0.696851163 |
| 2-methyl-1-butanol    | LA3999 | 0.3658 | 0.003523381 | 0.053215665 |
| 2-methyl-1-butanol    | LA4000 | 0.9288 | 0.872805365 | 0.970384791 |
| 2-methyl-1-butanol    | LA4001 | 0.5406 | 0.182909455 | 0.582511884 |
| 2-methyl-1-butanol    | LA4002 | 1.7927 | 0.019446638 | 0.166219867 |
| 2-methyl-1-butanol    | LA4003 | 0.7929 | 0.437988206 | 0.815233522 |
| 2-methyl-1-butanol    | LA4004 | 1.4219 | 0.209432846 | 0.619791595 |
| 2-methyl-1-butanol    | LA4005 | 1.0926 | 0.776613508 | 0.944905501 |
| 2-methyl-1-butanol    | LA4006 | 1.1449 | 0.601716212 | 0.891215687 |
| 2-methyl-1-butanol    | LA4007 | 1.5571 | 0.173894579 | 0.569109531 |
| 2-methyl-1-butanol    | LA4008 | 2.1459 | 0.00477517  | 0.064087808 |
| 2-methyl-1-butanol    | LA4009 | 0.7289 | 0.328550434 | 0.742514275 |
| 2-methyl-1-butanol    | LA4010 | 1.3498 | 0.336334014 | 0.749586368 |
| 2-methylbutanaldehyde | LA1777 | 4.0839 | 0.00026661  | 0.008410584 |
| 2-methylbutanaldehyde | LA3913 | 0.7271 | 0.190601159 | 0.595750303 |
| 2-methylbutanaldehyde | LA3914 | 1.9154 | 0.06317414  | 0.340939803 |
| 2-methylbutanaldehyde | LA3915 | 0.9985 | 0.995806927 | 0.998417168 |
| 2-methylbutanaldehyde | LA3916 | 1.3501 | 0.390432482 | 0.781231942 |
| 2-methylbutanaldehyde | LA3917 | 0.9322 | 0.855318977 | 0.968539929 |
| 2-methylbutanaldehyde | LA3918 | 1.1332 | 0.559713719 | 0.877064179 |
| 2-methylbutanaldehyde | LA3919 | 0.6275 | 0.183072874 | 0.582511884 |
| 2-methylbutanaldehyde | LA3920 | 0.6698 | 0.298735387 | 0.722336997 |
| 2-methylbutanaldehyde | LA3921 | 1.0586 | 0.787951819 | 0.947232543 |
| 2-methylbutanaldehyde | LA3922 | 1.3827 | 0.257701097 | 0.677461647 |
| 2-methylbutanaldehyde | LA3923 | 2.2824 | 0.06111041  | 0.335723258 |
| 2-methylbutanaldehyde | LA3924 | 1.6253 | 0.053847371 | 0.312069991 |
| 2-methylbutanaldehyde | LA3925 | 1.5758 | 0.13383048  | 0.508090904 |
| 2-methylbutanaldehyde | LA3926 | 1.9114 | 0.023149308 | 0.185956007 |
| 2-methylbutanaldehyde | LA3927 | 1.6826 | 0.055758033 | 0.319512324 |
| 2-methylbutanaldehyde | LA3929 | 0.4996 | 0.072204151 | 0.36220443  |

|                       |        |        |             |             |
|-----------------------|--------|--------|-------------|-------------|
| 2-methylbutanaldehyde | LA3930 | 1.5437 | 0.260314409 | 0.680240898 |
| 2-methylbutanaldehyde | LA3931 | 1.7037 | 0.010345455 | 0.111468635 |
| 2-methylbutanaldehyde | LA3932 | 0.8585 | 0.577333453 | 0.882878744 |
| 2-methylbutanaldehyde | LA3933 | 0.8865 | 0.783686335 | 0.946467831 |
| 2-methylbutanaldehyde | LA3934 | 1.2781 | 0.313072557 | 0.732830713 |
| 2-methylbutanaldehyde | LA3935 | 1.1706 | 0.411868868 | 0.795153777 |
| 2-methylbutanaldehyde | LA3936 | 0.6797 | 0.202461827 | 0.610979478 |
| 2-methylbutanaldehyde | LA3937 | 1.9312 | 0.002568399 | 0.042028347 |
| 2-methylbutanaldehyde | LA3938 | 2.7029 | 9.08895E-08 | 1.20E-05    |
| 2-methylbutanaldehyde | LA3939 | 1.4706 | 0.10269599  | 0.435828549 |
| 2-methylbutanaldehyde | LA3940 | 1.0619 | 0.853070013 | 0.968539929 |
| 2-methylbutanaldehyde | LA3941 | 1.0938 | 0.816084386 | 0.959361591 |
| 2-methylbutanaldehyde | LA3942 | 1.1890 | 0.488530042 | 0.841212822 |
| 2-methylbutanaldehyde | LA3943 | 1.2350 | 0.294393463 | 0.716092207 |
| 2-methylbutanaldehyde | LA3944 | 0.7680 | 0.311940179 | 0.732830713 |
| 2-methylbutanaldehyde | LA3945 | 1.8303 | 0.045405659 | 0.280017706 |
| 2-methylbutanaldehyde | LA3946 | 0.9441 | 0.819312472 | 0.959431373 |
| 2-methylbutanaldehyde | LA3947 | 1.3990 | 0.336735375 | 0.749691598 |
| 2-methylbutanaldehyde | LA3948 | 0.4920 | 0.042878077 | 0.268835336 |
| 2-methylbutanaldehyde | LA3949 | 0.9160 | 0.719079293 | 0.925212938 |
| 2-methylbutanaldehyde | LA3950 | 0.2212 | 0.000615972 | 0.016421833 |
| 2-methylbutanaldehyde | LA3952 | 1.2663 | 0.366670801 | 0.762755031 |
| 2-methylbutanaldehyde | LA3953 | 1.3886 | 0.135300254 | 0.509248188 |
| 2-methylbutanaldehyde | LA3954 | 1.1333 | 0.678160926 | 0.914681245 |
| 2-methylbutanaldehyde | LA3955 | 1.4329 | 0.066339994 | 0.351211733 |
| 2-methylbutanaldehyde | LA3956 | 0.9797 | 0.911922925 | 0.973773422 |
| 2-methylbutanaldehyde | LA3957 | 1.9300 | 0.06015276  | 0.332852524 |
| 2-methylbutanaldehyde | LA3958 | 1.2373 | 0.301755468 | 0.724781579 |
| 2-methylbutanaldehyde | LA3959 | 1.2361 | 0.510450112 | 0.850963952 |
| 2-methylbutanaldehyde | LA3960 | 1.0244 | 0.956227792 | 0.984553949 |
| 2-methylbutanaldehyde | LA3961 | 1.6363 | 0.086543604 | 0.398830464 |
| 2-methylbutanaldehyde | LA3962 | 0.9287 | 0.748548175 | 0.931898617 |
| 2-methylbutanaldehyde | LA3963 | 1.2513 | 0.387574375 | 0.778908117 |
| 2-methylbutanaldehyde | LA3964 | 1.6102 | 0.026920041 | 0.204405274 |
| 2-methylbutanaldehyde | LA3965 | 3.1688 | 1.7455E-07  | 1.98E-05    |
| 2-methylbutanaldehyde | LA3966 | 2.0165 | 0.06932685  | 0.356649926 |
| 2-methylbutanaldehyde | LA3967 | 1.6454 | 0.019316112 | 0.166219867 |
| 2-methylbutanaldehyde | LA3968 | 1.2830 | 0.207434116 | 0.61685947  |
| 2-methylbutanaldehyde | LA3969 | 2.7510 | 1.81007E-05 | 0.00086544  |
| 2-methylbutanaldehyde | LA3970 | 1.2762 | 0.645949787 | 0.905529102 |
| 2-methylbutanaldehyde | LA3971 | 2.9632 | 0.041017952 | 0.262035351 |
| 2-methylbutanaldehyde | LA3976 | 1.4484 | 0.400079853 | 0.78816956  |
| 2-methylbutanaldehyde | LA3977 | 0.6936 | 0.405924817 | 0.790942448 |
| 2-methylbutanaldehyde | LA3978 | 1.2874 | 0.403215989 | 0.789846977 |
| 2-methylbutanaldehyde | LA3979 | 2.1391 | 0.303696711 | 0.727730568 |
| 2-methylbutanaldehyde | LA3980 | 3.6332 | 4.96299E-10 | 1.17E-07    |
| 2-methylbutanaldehyde | LA3981 | 1.4617 | 0.326697075 | 0.74216262  |
| 2-methylbutanaldehyde | LA3983 | 1.5567 | 0.20618456  | 0.615536345 |
| 2-methylbutanaldehyde | LA3984 | 2.2150 | 0.134417408 | 0.508254208 |
| 2-methylbutanaldehyde | LA3985 | 0.1580 | 0.012834538 | 0.128766185 |
| 2-methylbutanaldehyde | LA3986 | 0.8914 | 0.722113808 | 0.925212938 |
| 2-methylbutanaldehyde | LA3988 | 1.4517 | 0.15094826  | 0.532762115 |
| 2-methylbutanaldehyde | LA3989 | 1.8616 | 0.241993335 | 0.661303851 |
| 2-methylbutanaldehyde | LA3990 | 1.2313 | 0.520903328 | 0.854563704 |
| 2-methylbutanaldehyde | LA3992 | 1.2672 | 0.748767514 | 0.931898617 |
| 2-methylbutanaldehyde | LA3993 | 0.4702 | 0.154660182 | 0.53902068  |
| 2-methylbutanaldehyde | LA3994 | 2.9940 | 0.0391327   | 0.256965798 |
| 2-methylbutanaldehyde | LA3995 | 0.8373 | 0.434873208 | 0.813917408 |
| 2-methylbutanaldehyde | LA3996 | 1.1779 | 0.448265575 | 0.821803266 |
| 2-methylbutanaldehyde | LA3997 | 1.6557 | 0.342377741 | 0.75535392  |
| 2-methylbutanaldehyde | LA3998 | 0.8772 | 0.619402984 | 0.898077541 |
| 2-methylbutanaldehyde | LA3999 | 0.6381 | 0.117953267 | 0.476518625 |

|                       |        |         |             |             |
|-----------------------|--------|---------|-------------|-------------|
| 2-methylbutanaldehyde | LA4000 | 1.3321  | 0.457136541 | 0.826457792 |
| 2-methylbutanaldehyde | LA4001 | 0.3276  | 0.00389579  | 0.056219117 |
| 2-methylbutanaldehyde | LA4002 | 1.2971  | 0.211931579 | 0.62390909  |
| 2-methylbutanaldehyde | LA4003 | 0.9112  | 0.709906293 | 0.923602575 |
| 2-methylbutanaldehyde | LA4004 | 1.3332  | 0.219620154 | 0.634940929 |
| 2-methylbutanaldehyde | LA4005 | 0.8726  | 0.601166833 | 0.890833176 |
| 2-methylbutanaldehyde | LA4006 | 1.3754  | 0.141423972 | 0.517652338 |
| 2-methylbutanaldehyde | LA4007 | 1.5336  | 0.116061101 | 0.4710172   |
| 2-methylbutanaldehyde | LA4008 | 1.9334  | 0.003547711 | 0.053215665 |
| 2-methylbutanaldehyde | LA4009 | 0.4220  | 0.001464289 | 0.02947845  |
| 2-methylbutanaldehyde | LA4010 | 1.3678  | 0.229601342 | 0.646943008 |
| 2-phenyl ethanol      | LA1777 | 3.1451  | 0.171610265 | 0.564921897 |
| 2-phenyl ethanol      | LA3913 | 1.0820  | 0.881905945 | 0.970384791 |
| 2-phenyl ethanol      | LA3914 | 6.1228  | 0.017562759 | 0.155904559 |
| 2-phenyl ethanol      | LA3915 | 0.4887  | 0.252828318 | 0.67390054  |
| 2-phenyl ethanol      | LA3916 | 11.7063 | 0.001285437 | 0.026635253 |
| 2-phenyl ethanol      | LA3917 | 0.2233  | 0.074388017 | 0.366275063 |
| 2-phenyl ethanol      | LA3918 | 0.9382  | 0.889372387 | 0.972213686 |
| 2-phenyl ethanol      | LA3919 | 0.5759  | 0.469408633 | 0.832207658 |
| 2-phenyl ethanol      | LA3920 | 0.8289  | 0.823320313 | 0.960073694 |
| 2-phenyl ethanol      | LA3921 | 1.3226  | 0.544575996 | 0.870032647 |
| 2-phenyl ethanol      | LA3922 | 1.3499  | 0.630533853 | 0.898759707 |
| 2-phenyl ethanol      | LA3923 | 0.2618  | 0.162804697 | 0.550658469 |
| 2-phenyl ethanol      | LA3924 | 2.3251  | 0.124204462 | 0.490407295 |
| 2-phenyl ethanol      | LA3925 | 1.6795  | 0.432749291 | 0.813917408 |
| 2-phenyl ethanol      | LA3926 | 0.3163  | 0.064018471 | 0.344282111 |
| 2-phenyl ethanol      | LA3927 | 1.4757  | 0.511237847 | 0.850963952 |
| 2-phenyl ethanol      | LA3929 | 1.6179  | 0.567070469 | 0.87990471  |
| 2-phenyl ethanol      | LA3930 | 3.5551  | 0.131566574 | 0.504661815 |
| 2-phenyl ethanol      | LA3931 | 1.3179  | 0.54139029  | 0.869634797 |
| 2-phenyl ethanol      | LA3932 | 0.1703  | 0.003100079 | 0.048439097 |
| 2-phenyl ethanol      | LA3933 | 0.0950  | 0.014050708 | 0.136060653 |
| 2-phenyl ethanol      | LA3934 | 2.1561  | 0.147461237 | 0.529241957 |
| 2-phenyl ethanol      | LA3935 | 1.8302  | 0.148741706 | 0.529919661 |
| 2-phenyl ethanol      | LA3936 | 1.3711  | 0.632572335 | 0.899415917 |
| 2-phenyl ethanol      | LA3937 | 1.7451  | 0.24069426  | 0.661303851 |
| 2-phenyl ethanol      | LA3938 | 2.6482  | 0.015576921 | 0.143570416 |
| 2-phenyl ethanol      | LA3939 | 1.9756  | 0.186107455 | 0.587795885 |
| 2-phenyl ethanol      | LA3940 | 0.7104  | 0.628439997 | 0.898759707 |
| 2-phenyl ethanol      | LA3941 | 2.9256  | 0.201768834 | 0.610979478 |
| 2-phenyl ethanol      | LA3942 | 2.3023  | 0.126099239 | 0.4940636   |
| 2-phenyl ethanol      | LA3943 | 1.8508  | 0.160783472 | 0.548843207 |
| 2-phenyl ethanol      | LA3944 | 0.8175  | 0.723276034 | 0.925212938 |
| 2-phenyl ethanol      | LA3945 | 0.6083  | 0.449843291 | 0.821803266 |
| 2-phenyl ethanol      | LA3946 | 0.2374  | 0.008945844 | 0.10329918  |
| 2-phenyl ethanol      | LA3947 | 1.7373  | 0.468453795 | 0.831478314 |
| 2-phenyl ethanol      | LA3948 | 0.2419  | 0.063029676 | 0.340939803 |
| 2-phenyl ethanol      | LA3949 | 0.3769  | 0.066638523 | 0.351470075 |
| 2-phenyl ethanol      | LA3950 | 0.1233  | 0.028888397 | 0.214559453 |
| 2-phenyl ethanol      | LA3952 | 2.0522  | 0.2073853   | 0.61685947  |
| 2-phenyl ethanol      | LA3953 | 0.9080  | 0.840334617 | 0.963216984 |
| 2-phenyl ethanol      | LA3954 | 1.5832  | 0.484693985 | 0.84089408  |
| 2-phenyl ethanol      | LA3955 | 1.3296  | 0.504183853 | 0.848222216 |
| 2-phenyl ethanol      | LA3956 | 1.0683  | 0.870236188 | 0.970339004 |
| 2-phenyl ethanol      | LA3957 | 1.1645  | 0.841500609 | 0.963550576 |
| 2-phenyl ethanol      | LA3958 | 1.3508  | 0.503389236 | 0.847755125 |
| 2-phenyl ethanol      | LA3959 | 1.7285  | 0.435685201 | 0.813917408 |
| 2-phenyl ethanol      | LA3960 | 5.1181  | 0.088160528 | 0.402643605 |
| 2-phenyl ethanol      | LA3961 | 1.4359  | 0.563153976 | 0.877419128 |
| 2-phenyl ethanol      | LA3962 | 0.4977  | 0.16586974  | 0.555475385 |
| 2-phenyl ethanol      | LA3963 | 1.5953  | 0.408857412 | 0.792655055 |
| 2-phenyl ethanol      | LA3964 | 0.5213  | 0.164598396 | 0.553484716 |



|                    |        |         |             |             |
|--------------------|--------|---------|-------------|-------------|
| 2-phenyl ethanol   | LA3965 | 0.5543  | 0.216237243 | 0.63158377  |
| 2-phenyl ethanol   | LA3966 | 1.0871  | 0.920865818 | 0.97672423  |
| 2-phenyl ethanol   | LA3967 | 2.5355  | 0.044852043 | 0.277267175 |
| 2-phenyl ethanol   | LA3968 | 1.6292  | 0.257224211 | 0.677080098 |
| 2-phenyl ethanol   | LA3969 | 3.6415  | 0.011684752 | 0.119984366 |
| 2-phenyl ethanol   | LA3970 | 0.6821  | 0.740992727 | 0.931176005 |
| 2-phenyl ethanol   | LA3971 | 1.1751  | 0.889100001 | 0.972213686 |
| 2-phenyl ethanol   | LA3976 | 0.1736  | 0.068340303 | 0.355044698 |
| 2-phenyl ethanol   | LA3977 | 0.3708  | 0.301270534 | 0.724275522 |
| 2-phenyl ethanol   | LA3978 | 0.5664  | 0.388172985 | 0.778908117 |
| 2-phenyl ethanol   | LA3979 | 0.9663  | 0.983012864 | 0.993401375 |
| 2-phenyl ethanol   | LA3980 | 5.0933  | 0.000282623 | 0.008587542 |
| 2-phenyl ethanol   | LA3981 | 2.8730  | 0.21104308  | 0.62215012  |
| 2-phenyl ethanol   | LA3983 | 2.0189  | 0.357107729 | 0.762755031 |
| 2-phenyl ethanol   | LA3984 | 7.2640  | 0.086924739 | 0.399984513 |
| 2-phenyl ethanol   | LA3985 | 0.1233  | 0.194720632 | 0.603082119 |
| 2-phenyl ethanol   | LA3986 | 16.7071 | 7.01118E-05 | 0.002715723 |
| 2-phenyl ethanol   | LA3988 | 1.4477  | 0.512922247 | 0.850963952 |
| 2-phenyl ethanol   | LA3989 | 3.2825  | 0.304543135 | 0.727876042 |
| 2-phenyl ethanol   | LA3990 | 1.9341  | 0.350615136 | 0.761980418 |
| 2-phenyl ethanol   | LA3992 | 6.1462  | 0.26003314  | 0.680086674 |
| 2-phenyl ethanol   | LA3993 | 0.1098  | 0.056118427 | 0.319965051 |
| 2-phenyl ethanol   | LA3994 | 16.7242 | 0.015121264 | 0.141070329 |
| 2-phenyl ethanol   | LA3995 | 0.6197  | 0.334524997 | 0.748826987 |
| 2-phenyl ethanol   | LA3996 | 2.6932  | 0.035475491 | 0.240698453 |
| 2-phenyl ethanol   | LA3997 | 0.1196  | 0.06684823  | 0.351470075 |
| 2-phenyl ethanol   | LA3998 | 5.3766  | 0.003525663 | 0.053215665 |
| 2-phenyl ethanol   | LA3999 | 0.8718  | 0.826460765 | 0.960073694 |
| 2-phenyl ethanol   | LA4000 | 0.4392  | 0.327729866 | 0.742514275 |
| 2-phenyl ethanol   | LA4001 | 0.4643  | 0.361520966 | 0.762755031 |
| 2-phenyl ethanol   | LA4002 | 1.4879  | 0.381604525 | 0.775886941 |
| 2-phenyl ethanol   | LA4003 | 0.9371  | 0.905006855 | 0.973435137 |
| 2-phenyl ethanol   | LA4004 | 0.5470  | 0.237357419 | 0.657868733 |
| 2-phenyl ethanol   | LA4005 | 0.8070  | 0.706001782 | 0.92238941  |
| 2-phenyl ethanol   | LA4006 | 2.0881  | 0.119225683 | 0.478173278 |
| 2-phenyl ethanol   | LA4007 | 1.1674  | 0.793995796 | 0.948513004 |
| 2-phenyl ethanol   | LA4008 | 2.7022  | 0.043391259 | 0.270973985 |
| 2-phenyl ethanol   | LA4009 | 0.5281  | 0.278763679 | 0.699194146 |
| 2-phenyl ethanol   | LA4010 | 1.1955  | 0.753221258 | 0.934654116 |
| 3-methyl-1-butanol | LA1777 | 0.4398  | 0.146851237 | 0.528664453 |
| 3-methyl-1-butanol | LA3913 | 0.4436  | 0.023507862 | 0.187984916 |
| 3-methyl-1-butanol | LA3914 | 0.4629  | 0.134597329 | 0.508254208 |
| 3-methyl-1-butanol | LA3915 | 0.6528  | 0.313162324 | 0.732830713 |
| 3-methyl-1-butanol | LA3916 | 0.7639  | 0.600564278 | 0.890833176 |
| 3-methyl-1-butanol | LA3917 | 0.1515  | 0.000911227 | 0.020808617 |
| 3-methyl-1-butanol | LA3918 | 1.2792  | 0.426466488 | 0.807680056 |
| 3-methyl-1-butanol | LA3919 | 0.6798  | 0.453738557 | 0.825713894 |
| 3-methyl-1-butanol | LA3920 | 0.5072  | 0.231863715 | 0.650173777 |
| 3-methyl-1-butanol | LA3921 | 1.0471  | 0.882520185 | 0.970586028 |
| 3-methyl-1-butanol | LA3922 | 0.6673  | 0.337116222 | 0.749691598 |
| 3-methyl-1-butanol | LA3923 | 0.6367  | 0.486121352 | 0.84089408  |
| 3-methyl-1-butanol | LA3924 | 0.7702  | 0.481019983 | 0.839179674 |
| 3-methyl-1-butanol | LA3925 | 0.7188  | 0.459449214 | 0.826457792 |
| 3-methyl-1-butanol | LA3926 | 1.0394  | 0.926581134 | 0.978377595 |
| 3-methyl-1-butanol | LA3927 | 1.2675  | 0.553480555 | 0.876177185 |
| 3-methyl-1-butanol | LA3929 | 0.3026  | 0.035469263 | 0.240698453 |
| 3-methyl-1-butanol | LA3930 | 1.1712  | 0.780697308 | 0.945579457 |
| 3-methyl-1-butanol | LA3931 | 1.2296  | 0.498366241 | 0.844875733 |
| 3-methyl-1-butanol | LA3932 | 0.1971  | 6.10394E-05 | 0.002457639 |
| 3-methyl-1-butanol | LA3933 | 0.2751  | 0.046018014 | 0.280509999 |
| 3-methyl-1-butanol | LA3934 | 1.4090  | 0.338306336 | 0.75124629  |
| 3-methyl-1-butanol | LA3935 | 2.8296  | 0.000246454 | 0.007938413 |



|                    |        |        |             |             |
|--------------------|--------|--------|-------------|-------------|
| 3-methyl-1-butanol | LA3936 | 1.4569 | 0.398746962 | 0.787456983 |
| 3-methyl-1-butanol | LA3937 | 2.0791 | 0.022567131 | 0.182686299 |
| 3-methyl-1-butanol | LA3938 | 2.2030 | 0.003708067 | 0.054025315 |
| 3-methyl-1-butanol | LA3939 | 0.8565 | 0.655944588 | 0.909027475 |
| 3-methyl-1-butanol | LA3940 | 0.7532 | 0.552629159 | 0.875282208 |
| 3-methyl-1-butanol | LA3941 | 0.3367 | 0.055417906 | 0.318159085 |
| 3-methyl-1-butanol | LA3942 | 0.4947 | 0.056044084 | 0.319965051 |
| 3-methyl-1-butanol | LA3943 | 0.6796 | 0.192541974 | 0.599978045 |
| 3-methyl-1-butanol | LA3944 | 1.1919 | 0.647778825 | 0.905529102 |
| 3-methyl-1-butanol | LA3945 | 1.2962 | 0.559178929 | 0.877064179 |
| 3-methyl-1-butanol | LA3946 | 0.3730 | 0.007947772 | 0.093379265 |
| 3-methyl-1-butanol | LA3947 | 0.9060 | 0.847844511 | 0.965539339 |
| 3-methyl-1-butanol | LA3948 | 1.3489 | 0.561231815 | 0.877064179 |
| 3-methyl-1-butanol | LA3949 | 1.0280 | 0.938646556 | 0.979979304 |
| 3-methyl-1-butanol | LA3950 | 0.1526 | 0.003714894 | 0.054025315 |
| 3-methyl-1-butanol | LA3952 | 1.0920 | 0.819207799 | 0.959431373 |
| 3-methyl-1-butanol | LA3953 | 1.4520 | 0.24897383  | 0.669223144 |
| 3-methyl-1-butanol | LA3954 | 1.2846 | 0.572787384 | 0.881536692 |
| 3-methyl-1-butanol | LA3955 | 0.8691 | 0.626268292 | 0.898443963 |
| 3-methyl-1-butanol | LA3956 | 0.6915 | 0.177053769 | 0.573316966 |
| 3-methyl-1-butanol | LA3957 | 1.0229 | 0.964854409 | 0.985365106 |
| 3-methyl-1-butanol | LA3958 | 1.6479 | 0.10002481  | 0.431700872 |
| 3-methyl-1-butanol | LA3959 | 1.2422 | 0.647302857 | 0.905529102 |
| 3-methyl-1-butanol | LA3960 | 0.5237 | 0.316883696 | 0.735150955 |
| 3-methyl-1-butanol | LA3961 | 2.1195 | 0.075758251 | 0.367755808 |
| 3-methyl-1-butanol | LA3962 | 0.9000 | 0.756605928 | 0.936196579 |
| 3-methyl-1-butanol | LA3963 | 1.1522 | 0.71068448  | 0.923910251 |
| 3-methyl-1-butanol | LA3964 | 0.9856 | 0.963318472 | 0.984553949 |
| 3-methyl-1-butanol | LA3965 | 2.0765 | 0.023528831 | 0.187984916 |
| 3-methyl-1-butanol | LA3966 | 3.4924 | 0.027885054 | 0.210168141 |
| 3-methyl-1-butanol | LA3967 | 1.3805 | 0.302792554 | 0.72670213  |
| 3-methyl-1-butanol | LA3968 | 0.9764 | 0.934680433 | 0.979385922 |
| 3-methyl-1-butanol | LA3969 | 2.2452 | 0.019430782 | 0.166219867 |
| 3-methyl-1-butanol | LA3970 | 0.5585 | 0.456227017 | 0.826457792 |
| 3-methyl-1-butanol | LA3971 | 1.7386 | 0.479240584 | 0.838051446 |
| 3-methyl-1-butanol | LA3976 | 0.2568 | 0.0361732   | 0.244889363 |
| 3-methyl-1-butanol | LA3977 | 0.3104 | 0.07128231  | 0.359347395 |
| 3-methyl-1-butanol | LA3978 | 1.0562 | 0.902126429 | 0.973435137 |
| 3-methyl-1-butanol | LA3979 | 2.8819 | 0.33078156  | 0.74425851  |
| 3-methyl-1-butanol | LA3980 | 2.1866 | 0.009630067 | 0.108321792 |
| 3-methyl-1-butanol | LA3981 | 0.4336 | 0.142648127 | 0.520886955 |
| 3-methyl-1-butanol | LA3983 | 1.0651 | 0.902585924 | 0.973435137 |
| 3-methyl-1-butanol | LA3984 | 0.6499 | 0.581433382 | 0.883886192 |
| 3-methyl-1-butanol | LA3985 | 0.1932 | 0.131642393 | 0.504661815 |
| 3-methyl-1-butanol | LA3986 | 0.2919 | 0.009826963 | 0.109477253 |
| 3-methyl-1-butanol | LA3988 | 1.8826 | 0.097841662 | 0.426201672 |
| 3-methyl-1-butanol | LA3989 | 1.4711 | 0.621395227 | 0.898077541 |
| 3-methyl-1-butanol | LA3990 | 1.0393 | 0.935640324 | 0.979392316 |
| 3-methyl-1-butanol | LA3992 | 0.2672 | 0.225498265 | 0.642910426 |
| 3-methyl-1-butanol | LA3993 | 0.3844 | 0.220583793 | 0.634940929 |
| 3-methyl-1-butanol | LA3994 | 1.1382 | 0.868430757 | 0.970339004 |
| 3-methyl-1-butanol | LA3995 | 0.7158 | 0.318149395 | 0.735597447 |
| 3-methyl-1-butanol | LA3996 | 0.4571 | 0.013923173 | 0.135708369 |
| 3-methyl-1-butanol | LA3997 | 1.2581 | 0.768950832 | 0.94243751  |
| 3-methyl-1-butanol | LA3998 | 1.6817 | 0.180916516 | 0.580907176 |
| 3-methyl-1-butanol | LA3999 | 0.6001 | 0.227304903 | 0.645149485 |
| 3-methyl-1-butanol | LA4000 | 0.6943 | 0.520512102 | 0.854488751 |
| 3-methyl-1-butanol | LA4001 | 0.2608 | 0.018122407 | 0.159352199 |
| 3-methyl-1-butanol | LA4002 | 2.2606 | 0.007964702 | 0.093379265 |
| 3-methyl-1-butanol | LA4003 | 0.9048 | 0.785789242 | 0.946659481 |
| 3-methyl-1-butanol | LA4004 | 0.5574 | 0.090310141 | 0.408300695 |
| 3-methyl-1-butanol | LA4005 | 1.0704 | 0.859309891 | 0.968539929 |

|                         |        |        |             |             |
|-------------------------|--------|--------|-------------|-------------|
| 3-methyl-1-butanol      | LA4006 | 0.5452 | 0.057472653 | 0.323879039 |
| 3-methyl-1-butanol      | LA4007 | 3.3740 | 0.002451395 | 0.041398488 |
| 3-methyl-1-butanol      | LA4008 | 2.3453 | 0.010390137 | 0.11155726  |
| 3-methyl-1-butanol      | LA4009 | 0.9500 | 0.897510398 | 0.973435137 |
| 3-methyl-1-butanol      | LA4010 | 1.0896 | 0.822921729 | 0.960073694 |
| 6-methyl-5-hepten-2-one | LA1777 | 0.0450 | 5.60726E-11 | 1.67E-08    |
| 6-methyl-5-hepten-2-one | LA3913 | 0.9668 | 0.909100006 | 0.973773422 |
| 6-methyl-5-hepten-2-one | LA3914 | 0.6856 | 0.37381785  | 0.768800257 |
| 6-methyl-5-hepten-2-one | LA3915 | 1.2259 | 0.559272795 | 0.877064179 |
| 6-methyl-5-hepten-2-one | LA3916 | 0.8031 | 0.605474035 | 0.89289183  |
| 6-methyl-5-hepten-2-one | LA3917 | 0.2263 | 0.001545549 | 0.029811655 |
| 6-methyl-5-hepten-2-one | LA3918 | 0.8094 | 0.407680468 | 0.79156233  |
| 6-methyl-5-hepten-2-one | LA3919 | 1.2191 | 0.640999532 | 0.902234852 |
| 6-methyl-5-hepten-2-one | LA3920 | 0.8158 | 0.663622595 | 0.910087458 |
| 6-methyl-5-hepten-2-one | LA3921 | 0.7788 | 0.331077095 | 0.744376128 |
| 6-methyl-5-hepten-2-one | LA3922 | 0.0584 | 1.18358E-15 | 1.21E-12    |
| 6-methyl-5-hepten-2-one | LA3923 | 0.0283 | 4.86049E-11 | 1.67E-08    |
| 6-methyl-5-hepten-2-one | LA3924 | 0.9954 | 0.988036698 | 0.994864197 |
| 6-methyl-5-hepten-2-one | LA3925 | 1.0843 | 0.8260688   | 0.960073694 |
| 6-methyl-5-hepten-2-one | LA3926 | 0.3460 | 0.002223624 | 0.039559822 |
| 6-methyl-5-hepten-2-one | LA3927 | 0.3758 | 0.003102635 | 0.048439097 |
| 6-methyl-5-hepten-2-one | LA3929 | 0.6508 | 0.359148492 | 0.762755031 |
| 6-methyl-5-hepten-2-one | LA3930 | 0.9621 | 0.934191712 | 0.979385922 |
| 6-methyl-5-hepten-2-one | LA3931 | 0.9798 | 0.935462883 | 0.979392316 |
| 6-methyl-5-hepten-2-one | LA3932 | 0.5617 | 0.083146022 | 0.3886885   |
| 6-methyl-5-hepten-2-one | LA3933 | 1.0261 | 0.961426344 | 0.984553949 |
| 6-methyl-5-hepten-2-one | LA3934 | 1.1127 | 0.71760497  | 0.925212938 |
| 6-methyl-5-hepten-2-one | LA3935 | 1.0598 | 0.803240653 | 0.952293751 |
| 6-methyl-5-hepten-2-one | LA3936 | 0.9241 | 0.829955862 | 0.961227152 |
| 6-methyl-5-hepten-2-one | LA3937 | 0.7339 | 0.242045854 | 0.661303851 |
| 6-methyl-5-hepten-2-one | LA3938 | 1.6289 | 0.02957868  | 0.216532921 |
| 6-methyl-5-hepten-2-one | LA3939 | 1.0189 | 0.947986225 | 0.982875948 |
| 6-methyl-5-hepten-2-one | LA3940 | 1.4149 | 0.378082892 | 0.771818109 |
| 6-methyl-5-hepten-2-one | LA3941 | 0.7349 | 0.510717766 | 0.850963952 |
| 6-methyl-5-hepten-2-one | LA3942 | 1.1447 | 0.656222775 | 0.909027475 |
| 6-methyl-5-hepten-2-one | LA3943 | 1.1456 | 0.578128146 | 0.883211247 |
| 6-methyl-5-hepten-2-one | LA3944 | 0.4982 | 0.028209546 | 0.211571595 |
| 6-methyl-5-hepten-2-one | LA3945 | 0.5453 | 0.098248382 | 0.426201672 |
| 6-methyl-5-hepten-2-one | LA3946 | 0.4940 | 0.021332907 | 0.176805204 |
| 6-methyl-5-hepten-2-one | LA3947 | 1.7224 | 0.200375511 | 0.610098571 |
| 6-methyl-5-hepten-2-one | LA3948 | 1.2775 | 0.56432647  | 0.878798472 |
| 6-methyl-5-hepten-2-one | LA3949 | 1.0139 | 0.962866363 | 0.984553949 |
| 6-methyl-5-hepten-2-one | LA3950 | 0.8578 | 0.773511209 | 0.943176305 |
| 6-methyl-5-hepten-2-one | LA3952 | 1.1900 | 0.58381706  | 0.884306564 |
| 6-methyl-5-hepten-2-one | LA3953 | 1.1645 | 0.568103857 | 0.87990471  |
| 6-methyl-5-hepten-2-one | LA3954 | 1.2761 | 0.505758014 | 0.848941044 |
| 6-methyl-5-hepten-2-one | LA3955 | 1.0663 | 0.787139091 | 0.947232543 |
| 6-methyl-5-hepten-2-one | LA3956 | 0.8810 | 0.573953417 | 0.881536692 |
| 6-methyl-5-hepten-2-one | LA3957 | 0.7817 | 0.561740839 | 0.877064179 |
| 6-methyl-5-hepten-2-one | LA3958 | 0.8605 | 0.548364228 | 0.872041817 |
| 6-methyl-5-hepten-2-one | LA3959 | 1.1096 | 0.790302621 | 0.947489068 |
| 6-methyl-5-hepten-2-one | LA3960 | 1.2702 | 0.653625096 | 0.907895049 |
| 6-methyl-5-hepten-2-one | LA3961 | 0.6448 | 0.208395562 | 0.618516411 |
| 6-methyl-5-hepten-2-one | LA3962 | 0.5853 | 0.05632603  | 0.319965051 |
| 6-methyl-5-hepten-2-one | LA3963 | 1.3101 | 0.391264601 | 0.781507623 |
| 6-methyl-5-hepten-2-one | LA3964 | 1.2646 | 0.368560979 | 0.763055883 |
| 6-methyl-5-hepten-2-one | LA3965 | 0.9955 | 0.986566778 | 0.994252622 |
| 6-methyl-5-hepten-2-one | LA3966 | 0.6041 | 0.282098677 | 0.702949472 |
| 6-methyl-5-hepten-2-one | LA3967 | 1.1297 | 0.636448065 | 0.900427508 |
| 6-methyl-5-hepten-2-one | LA3968 | 1.0148 | 0.951033514 | 0.982875948 |
| 6-methyl-5-hepten-2-one | LA3969 | 0.4575 | 0.006195573 | 0.07823701  |
| 6-methyl-5-hepten-2-one | LA3970 | 1.5988 | 0.466853834 | 0.831478314 |

|                         |        |        |             |             |
|-------------------------|--------|--------|-------------|-------------|
| 6-methyl-5-hepten-2-one | LA3971 | 1.5718 | 0.48319316  | 0.839381895 |
| 6-methyl-5-hepten-2-one | LA3976 | 0.6075 | 0.351357637 | 0.761980418 |
| 6-methyl-5-hepten-2-one | LA3977 | 1.8146 | 0.2652234   | 0.682576622 |
| 6-methyl-5-hepten-2-one | LA3978 | 0.7083 | 0.347328199 | 0.759160206 |
| 6-methyl-5-hepten-2-one | LA3979 | 1.1013 | 0.914413651 | 0.973773422 |
| 6-methyl-5-hepten-2-one | LA3980 | 1.5073 | 0.099375871 | 0.429505883 |
| 6-methyl-5-hepten-2-one | LA3981 | 1.4938 | 0.393229551 | 0.782614296 |
| 6-methyl-5-hepten-2-one | LA3983 | 1.4951 | 0.34408391  | 0.755811393 |
| 6-methyl-5-hepten-2-one | LA3984 | 2.2684 | 0.204220463 | 0.613420987 |
| 6-methyl-5-hepten-2-one | LA3985 | 2.5083 | 0.30647417  | 0.729376193 |
| 6-methyl-5-hepten-2-one | LA3986 | 0.7014 | 0.366530169 | 0.762755031 |
| 6-methyl-5-hepten-2-one | LA3988 | 1.1394 | 0.678655471 | 0.914681245 |
| 6-methyl-5-hepten-2-one | LA3989 | 1.5085 | 0.523827091 | 0.856723886 |
| 6-methyl-5-hepten-2-one | LA3990 | 1.1365 | 0.745164581 | 0.931898617 |
| 6-methyl-5-hepten-2-one | LA3992 | 0.8751 | 0.881908531 | 0.970384791 |
| 6-methyl-5-hepten-2-one | LA3993 | 0.5987 | 0.425535795 | 0.807342358 |
| 6-methyl-5-hepten-2-one | LA3994 | 2.3395 | 0.187693726 | 0.589674334 |
| 6-methyl-5-hepten-2-one | LA3995 | 1.0019 | 0.994613394 | 0.998201701 |
| 6-methyl-5-hepten-2-one | LA3996 | 1.2040 | 0.478876959 | 0.838051446 |
| 6-methyl-5-hepten-2-one | LA3997 | 1.0828 | 0.901850988 | 0.973435137 |
| 6-methyl-5-hepten-2-one | LA3998 | 1.0437 | 0.893798313 | 0.973435137 |
| 6-methyl-5-hepten-2-one | LA3999 | 0.5614 | 0.098154192 | 0.426201672 |
| 6-methyl-5-hepten-2-one | LA4000 | 0.4971 | 0.135813889 | 0.509926994 |
| 6-methyl-5-hepten-2-one | LA4001 | 0.5127 | 0.154023427 | 0.538779551 |
| 6-methyl-5-hepten-2-one | LA4002 | 1.2278 | 0.417390619 | 0.799348623 |
| 6-methyl-5-hepten-2-one | LA4003 | 0.5580 | 0.054839716 | 0.316621757 |
| 6-methyl-5-hepten-2-one | LA4004 | 0.9686 | 0.910652766 | 0.973773422 |
| 6-methyl-5-hepten-2-one | LA4005 | 0.9514 | 0.875054205 | 0.970384791 |
| 6-methyl-5-hepten-2-one | LA4006 | 1.1370 | 0.625487557 | 0.898316986 |
| 6-methyl-5-hepten-2-one | LA4007 | 1.1824 | 0.611963621 | 0.897272966 |
| 6-methyl-5-hepten-2-one | LA4008 | 1.1218 | 0.674688795 | 0.914322307 |
| 6-methyl-5-hepten-2-one | LA4009 | 0.5541 | 0.072404661 | 0.362610165 |
| 6-methyl-5-hepten-2-one | LA4010 | 1.2775 | 0.439134793 | 0.815452569 |
| benzaldehyde            | LA1777 | 2.4282 | 0.069797371 | 0.357157116 |
| benzaldehyde            | LA3913 | 0.5879 | 0.08639246  | 0.398830464 |
| benzaldehyde            | LA3914 | 1.1311 | 0.781617771 | 0.945729687 |
| benzaldehyde            | LA3915 | 1.1050 | 0.784638    | 0.946467831 |
| benzaldehyde            | LA3916 | 0.7274 | 0.474043746 | 0.835017119 |
| benzaldehyde            | LA3917 | 0.3437 | 0.029482676 | 0.216532921 |
| benzaldehyde            | LA3918 | 0.5430 | 0.02266371  | 0.182984044 |
| benzaldehyde            | LA3919 | 0.5323 | 0.156706299 | 0.541765267 |
| benzaldehyde            | LA3920 | 0.5947 | 0.289382288 | 0.711252852 |
| benzaldehyde            | LA3921 | 0.8835 | 0.645426445 | 0.905529102 |
| benzaldehyde            | LA3922 | 0.5964 | 0.155850801 | 0.541320603 |
| benzaldehyde            | LA3923 | 0.3215 | 0.042960941 | 0.268835336 |
| benzaldehyde            | LA3924 | 0.8824 | 0.695850042 | 0.919007058 |
| benzaldehyde            | LA3925 | 1.0446 | 0.909970349 | 0.973773422 |
| benzaldehyde            | LA3926 | 0.9952 | 0.989423332 | 0.995605194 |
| benzaldehyde            | LA3927 | 1.0826 | 0.818279229 | 0.959431373 |
| benzaldehyde            | LA3929 | 0.7523 | 0.56167813  | 0.877064179 |
| benzaldehyde            | LA3930 | 1.0993 | 0.846849939 | 0.965539339 |
| benzaldehyde            | LA3931 | 1.0420 | 0.876027865 | 0.970384791 |
| benzaldehyde            | LA3932 | 0.1836 | 1.35955E-06 | 0.000104006 |
| benzaldehyde            | LA3933 | 0.4327 | 0.133713595 | 0.508090904 |
| benzaldehyde            | LA3934 | 1.2110 | 0.536008328 | 0.866905647 |
| benzaldehyde            | LA3935 | 1.2475 | 0.365026951 | 0.762755031 |
| benzaldehyde            | LA3936 | 1.1355 | 0.741408064 | 0.931176005 |
| benzaldehyde            | LA3937 | 0.8796 | 0.643069266 | 0.903634789 |
| benzaldehyde            | LA3938 | 1.4236 | 0.132267832 | 0.504661815 |
| benzaldehyde            | LA3939 | 1.1205 | 0.704803698 | 0.921272668 |
| benzaldehyde            | LA3940 | 1.1188 | 0.785330134 | 0.946659481 |
| benzaldehyde            | LA3941 | 0.7872 | 0.625592646 | 0.898316986 |

|                |        |        |             |             |
|----------------|--------|--------|-------------|-------------|
| benzaldehyde   | LA3942 | 1.1667 | 0.627585754 | 0.898759707 |
| benzaldehyde   | LA3943 | 0.9786 | 0.932724789 | 0.979385922 |
| benzaldehyde   | LA3944 | 0.4482 | 0.015811696 | 0.144429223 |
| benzaldehyde   | LA3945 | 2.7753 | 0.007951423 | 0.093379265 |
| benzaldehyde   | LA3946 | 0.7835 | 0.446170804 | 0.820447327 |
| benzaldehyde   | LA3947 | 1.1069 | 0.819265896 | 0.959431373 |
| benzaldehyde   | LA3948 | 0.4535 | 0.075843577 | 0.367755808 |
| benzaldehyde   | LA3949 | 0.9217 | 0.792747637 | 0.947951453 |
| benzaldehyde   | LA3950 | 0.4376 | 0.138940248 | 0.51471811  |
| benzaldehyde   | LA3952 | 1.1441 | 0.685698973 | 0.91782784  |
| benzaldehyde   | LA3953 | 1.2752 | 0.384354381 | 0.777413561 |
| benzaldehyde   | LA3954 | 1.0712 | 0.857668529 | 0.968539929 |
| benzaldehyde   | LA3955 | 1.0590 | 0.81770572  | 0.959431373 |
| benzaldehyde   | LA3956 | 0.6943 | 0.122399951 | 0.486420584 |
| benzaldehyde   | LA3957 | 0.9764 | 0.957183386 | 0.984553949 |
| benzaldehyde   | LA3958 | 0.8267 | 0.467871623 | 0.831478314 |
| benzaldehyde   | LA3959 | 0.7554 | 0.493474256 | 0.843121844 |
| benzaldehyde   | LA3960 | 2.5857 | 0.089052093 | 0.406109396 |
| benzaldehyde   | LA3961 | 2.5712 | 0.009838642 | 0.109477253 |
| benzaldehyde   | LA3962 | 2.4116 | 0.002792788 | 0.044736818 |
| benzaldehyde   | LA3963 | 1.1300 | 0.711099229 | 0.923910251 |
| benzaldehyde   | LA3964 | 3.3176 | 1.29724E-05 | 0.000684406 |
| benzaldehyde   | LA3965 | 3.9152 | 1.12756E-06 | 9.08E-05    |
| benzaldehyde   | LA3966 | 1.9644 | 0.16897541  | 0.560200167 |
| benzaldehyde   | LA3967 | 1.1401 | 0.627698557 | 0.898759707 |
| benzaldehyde   | LA3968 | 0.5998 | 0.042178992 | 0.266668834 |
| benzaldehyde   | LA3969 | 0.9899 | 0.972830938 | 0.98833422  |
| benzaldehyde   | LA3970 | 1.1527 | 0.833282783 | 0.96155125  |
| benzaldehyde   | LA3971 | 1.0463 | 0.946592972 | 0.982875948 |
| benzaldehyde   | LA3976 | 0.2364 | 0.010140622 | 0.110480627 |
| benzaldehyde   | LA3977 | 1.1392 | 0.815875649 | 0.959361591 |
| benzaldehyde   | LA3978 | 1.3497 | 0.435203317 | 0.813917408 |
| benzaldehyde   | LA3979 | 2.1806 | 0.406982442 | 0.79120714  |
| benzaldehyde   | LA3980 | 2.0166 | 0.007227261 | 0.087068577 |
| benzaldehyde   | LA3981 | 1.4558 | 0.445464958 | 0.820170139 |
| benzaldehyde   | LA3983 | 1.0600 | 0.895886687 | 0.973435137 |
| benzaldehyde   | LA3984 | 1.6672 | 0.44911736  | 0.821803266 |
| benzaldehyde   | LA3985 | 0.6963 | 0.700556662 | 0.919304287 |
| benzaldehyde   | LA3986 | 0.8202 | 0.629688738 | 0.898759707 |
| benzaldehyde   | LA3988 | 2.0358 | 0.031410601 | 0.224571119 |
| benzaldehyde   | LA3989 | 2.2984 | 0.217997369 | 0.634098811 |
| benzaldehyde   | LA3990 | 1.0747 | 0.861256082 | 0.968539929 |
| benzaldehyde   | LA3992 | 0.9400 | 0.947559321 | 0.982875948 |
| benzaldehyde   | LA3993 | 0.3891 | 0.161615226 | 0.548846947 |
| benzaldehyde   | LA3994 | 1.8408 | 0.366269697 | 0.762755031 |
| benzaldehyde   | LA3995 | 0.5921 | 0.070265377 | 0.357757161 |
| benzaldehyde   | LA3996 | 1.3842 | 0.236483578 | 0.657350152 |
| benzaldehyde   | LA3997 | 1.4436 | 0.586640455 | 0.88516755  |
| benzaldehyde   | LA3998 | 1.1467 | 0.68329973  | 0.91782784  |
| benzaldehyde   | LA3999 | 0.7703 | 0.47491043  | 0.835026951 |
| benzaldehyde   | LA4000 | 0.4422 | 0.096434772 | 0.423047964 |
| benzaldehyde   | LA4001 | 0.3240 | 0.021791628 | 0.178653625 |
| benzaldehyde   | LA4002 | 0.9667 | 0.898423873 | 0.973435137 |
| benzaldehyde   | LA4003 | 0.3264 | 0.000449446 | 0.012853316 |
| benzaldehyde   | LA4004 | 0.5820 | 0.069407285 | 0.356649926 |
| benzaldehyde   | LA4005 | 0.6971 | 0.276715278 | 0.696851163 |
| benzaldehyde   | LA4006 | 1.3951 | 0.227026098 | 0.645032368 |
| benzaldehyde   | LA4007 | 0.7583 | 0.423773803 | 0.806435222 |
| benzaldehyde   | LA4008 | 0.9662 | 0.904520883 | 0.973435137 |
| benzaldehyde   | LA4009 | 0.7638 | 0.433225992 | 0.813917408 |
| benzaldehyde   | LA4010 | 0.9552 | 0.889885798 | 0.972213686 |
| benzyl alcohol | LA1777 | 1.0014 | 0.998188996 | 0.999168573 |

|                |        |        |             |             |
|----------------|--------|--------|-------------|-------------|
| benzyl alcohol | LA3913 | 1.7162 | 0.157041778 | 0.541765267 |
| benzyl alcohol | LA3914 | 2.4874 | 0.096499176 | 0.423047964 |
| benzyl alcohol | LA3915 | 2.5651 | 0.03663786  | 0.246399674 |
| benzyl alcohol | LA3916 | 1.4503 | 0.497427973 | 0.844594188 |
| benzyl alcohol | LA3917 | 0.2761 | 0.033298362 | 0.233699513 |
| benzyl alcohol | LA3918 | 0.6244 | 0.153318092 | 0.538253088 |
| benzyl alcohol | LA3919 | 0.6028 | 0.356104989 | 0.762755031 |
| benzyl alcohol | LA3920 | 0.9078 | 0.872806088 | 0.970384791 |
| benzyl alcohol | LA3921 | 1.2004 | 0.582128389 | 0.883886192 |
| benzyl alcohol | LA3922 | 0.8656 | 0.74766336  | 0.931898617 |
| benzyl alcohol | LA3923 | 0.5047 | 0.321824225 | 0.738365343 |
| benzyl alcohol | LA3924 | 1.4555 | 0.34140681  | 0.754299522 |
| benzyl alcohol | LA3925 | 1.6607 | 0.285975638 | 0.707714126 |
| benzyl alcohol | LA3926 | 1.4020 | 0.449266195 | 0.821803266 |
| benzyl alcohol | LA3927 | 2.1996 | 0.064501726 | 0.344942366 |
| benzyl alcohol | LA3929 | 2.5299 | 0.12494668  | 0.492068006 |
| benzyl alcohol | LA3930 | 3.6565 | 0.032217726 | 0.229246538 |
| benzyl alcohol | LA3931 | 0.7649 | 0.409675257 | 0.7934217   |
| benzyl alcohol | LA3932 | 0.9209 | 0.847766921 | 0.965539339 |
| benzyl alcohol | LA3933 | 1.2752 | 0.723843063 | 0.925212938 |
| benzyl alcohol | LA3934 | 2.2775 | 0.031080994 | 0.222889167 |
| benzyl alcohol | LA3935 | 1.5825 | 0.127362046 | 0.495836973 |
| benzyl alcohol | LA3936 | 2.4340 | 0.061245084 | 0.335860138 |
| benzyl alcohol | LA3937 | 1.2928 | 0.451748062 | 0.82380755  |
| benzyl alcohol | LA3938 | 3.4876 | 1.73427E-05 | 0.000855946 |
| benzyl alcohol | LA3939 | 1.3828 | 0.381377082 | 0.775886941 |
| benzyl alcohol | LA3940 | 0.8204 | 0.696882265 | 0.919304287 |
| benzyl alcohol | LA3941 | 1.2242 | 0.737870953 | 0.93112521  |
| benzyl alcohol | LA3942 | 1.6981 | 0.17674876  | 0.573316966 |
| benzyl alcohol | LA3943 | 1.7150 | 0.087595332 | 0.402465039 |
| benzyl alcohol | LA3944 | 0.4042 | 0.027091269 | 0.205196245 |
| benzyl alcohol | LA3945 | 1.4786 | 0.408415749 | 0.792487122 |
| benzyl alcohol | LA3946 | 0.7539 | 0.474267893 | 0.835017119 |
| benzyl alcohol | LA3947 | 2.8677 | 0.054734799 | 0.316613393 |
| benzyl alcohol | LA3948 | 1.2114 | 0.726566087 | 0.925600427 |
| benzyl alcohol | LA3949 | 1.4020 | 0.376843687 | 0.771332229 |
| benzyl alcohol | LA3950 | 0.5047 | 0.320446532 | 0.737202017 |
| benzyl alcohol | LA3952 | 1.3656 | 0.447269024 | 0.821059562 |
| benzyl alcohol | LA3953 | 1.5969 | 0.174279432 | 0.569759682 |
| benzyl alcohol | LA3954 | 1.7258 | 0.248646463 | 0.669223144 |
| benzyl alcohol | LA3955 | 1.6151 | 0.118316307 | 0.476518625 |
| benzyl alcohol | LA3956 | 0.9352 | 0.817847538 | 0.959431373 |
| benzyl alcohol | LA3957 | 1.7345 | 0.314866519 | 0.732830713 |
| benzyl alcohol | LA3958 | 1.7229 | 0.092544175 | 0.413409015 |
| benzyl alcohol | LA3959 | 0.5285 | 0.206693369 | 0.616453908 |
| benzyl alcohol | LA3960 | 0.6688 | 0.558870395 | 0.877064179 |
| benzyl alcohol | LA3961 | 2.2403 | 0.073336513 | 0.363711069 |
| benzyl alcohol | LA3962 | 1.0983 | 0.795549415 | 0.948513004 |
| benzyl alcohol | LA3963 | 1.3589 | 0.45073787  | 0.822455505 |
| benzyl alcohol | LA3964 | 2.1274 | 0.025289519 | 0.197413082 |
| benzyl alcohol | LA3965 | 6.2818 | 1.09812E-07 | 1.34E-05    |
| benzyl alcohol | LA3966 | 1.4608 | 0.53086101  | 0.861769067 |
| benzyl alcohol | LA3967 | 1.4481 | 0.266559991 | 0.685439977 |
| benzyl alcohol | LA3968 | 1.4428 | 0.236682997 | 0.657350152 |
| benzyl alcohol | LA3969 | 1.8924 | 0.083233929 | 0.3886885   |
| benzyl alcohol | LA3970 | 1.5372 | 0.605445647 | 0.89289183  |
| benzyl alcohol | LA3971 | 2.4113 | 0.290433624 | 0.712336922 |
| benzyl alcohol | LA3976 | 0.5886 | 0.442555185 | 0.816778568 |
| benzyl alcohol | LA3977 | 0.8661 | 0.834921941 | 0.96155125  |
| benzyl alcohol | LA3978 | 0.6531 | 0.368517547 | 0.763055883 |
| benzyl alcohol | LA3979 | 4.4513 | 0.197695551 | 0.607126492 |
| benzyl alcohol | LA3980 | 3.6230 | 6.64663E-05 | 0.002607524 |



|                  |        |         |             |             |
|------------------|--------|---------|-------------|-------------|
| benzyl alcohol   | LA3981 | 2.5105  | 0.129401244 | 0.500591412 |
| benzyl alcohol   | LA3983 | 1.4723  | 0.480735777 | 0.83916228  |
| benzyl alcohol   | LA3984 | 2.7413  | 0.225859055 | 0.642910426 |
| benzyl alcohol   | LA3985 | 2.2321  | 0.489012944 | 0.841212822 |
| benzyl alcohol   | LA3986 | 1.8121  | 0.240983579 | 0.661303851 |
| benzyl alcohol   | LA3988 | 1.6321  | 0.228509792 | 0.645650936 |
| benzyl alcohol   | LA3989 | 2.3095  | 0.314713732 | 0.732830713 |
| benzyl alcohol   | LA3990 | 1.8658  | 0.219874064 | 0.634940929 |
| benzyl alcohol   | LA3992 | 0.5950  | 0.654183833 | 0.907945362 |
| benzyl alcohol   | LA3993 | 0.4807  | 0.37797399  | 0.771818109 |
| benzyl alcohol   | LA3994 | 4.2860  | 0.080650831 | 0.383937025 |
| benzyl alcohol   | LA3995 | 0.7093  | 0.335431687 | 0.749338373 |
| benzyl alcohol   | LA3996 | 1.1434  | 0.692127274 | 0.918070679 |
| benzyl alcohol   | LA3997 | 1.7617  | 0.496338645 | 0.844594188 |
| benzyl alcohol   | LA3998 | 1.6029  | 0.254051521 | 0.674824353 |
| benzyl alcohol   | LA3999 | 1.3531  | 0.501831998 | 0.846360081 |
| benzyl alcohol   | LA4000 | 0.4124  | 0.143108083 | 0.521943664 |
| benzyl alcohol   | LA4001 | 0.6241  | 0.435562721 | 0.813917408 |
| benzyl alcohol   | LA4002 | 2.8177  | 0.00156644  | 0.029958165 |
| benzyl alcohol   | LA4003 | 0.4151  | 0.025026688 | 0.196363244 |
| benzyl alcohol   | LA4004 | 0.7979  | 0.538551774 | 0.868723473 |
| benzyl alcohol   | LA4005 | 0.7871  | 0.558017788 | 0.877064179 |
| benzyl alcohol   | LA4006 | 1.6282  | 0.151389218 | 0.533699317 |
| benzyl alcohol   | LA4007 | 1.2384  | 0.615873462 | 0.89790427  |
| benzyl alcohol   | LA4008 | 4.7050  | 1.33202E-05 | 0.000690844 |
| benzyl alcohol   | LA4009 | 0.8460  | 0.693053356 | 0.918070679 |
| benzyl alcohol   | LA4010 | 2.3235  | 0.039292723 | 0.257293785 |
| beta-damascenone | LA1777 | 25.0791 | 9.67309E-17 | 1.48E-13    |
| beta-damascenone | LA3913 | 0.9299  | 0.762070285 | 0.938912768 |
| beta-damascenone | LA3914 | 1.1834  | 0.625413564 | 0.898316986 |
| beta-damascenone | LA3915 | 1.1299  | 0.666619633 | 0.911463841 |
| beta-damascenone | LA3916 | 0.7341  | 0.370067857 | 0.764623661 |
| beta-damascenone | LA3917 | 1.3125  | 0.529636205 | 0.861522302 |
| beta-damascenone | LA3918 | 0.9818  | 0.929343077 | 0.979385922 |
| beta-damascenone | LA3919 | 1.6864  | 0.130369731 | 0.503066049 |
| beta-damascenone | LA3920 | 1.3186  | 0.46729806  | 0.831478314 |
| beta-damascenone | LA3921 | 1.2248  | 0.331768961 | 0.745384009 |
| beta-damascenone | LA3922 | 0.6885  | 0.186477136 | 0.587795885 |
| beta-damascenone | LA3923 | 1.0528  | 0.905731607 | 0.973435137 |
| beta-damascenone | LA3924 | 1.4993  | 0.103165148 | 0.435828549 |
| beta-damascenone | LA3925 | 1.1477  | 0.66593726  | 0.91093787  |
| beta-damascenone | LA3926 | 1.0404  | 0.887909944 | 0.971746934 |
| beta-damascenone | LA3927 | 1.0217  | 0.936183831 | 0.979392316 |
| beta-damascenone | LA3929 | 1.2756  | 0.522427695 | 0.856143518 |
| beta-damascenone | LA3930 | 1.0864  | 0.827702716 | 0.96011005  |
| beta-damascenone | LA3931 | 1.0180  | 0.930386854 | 0.979385922 |
| beta-damascenone | LA3932 | 1.2705  | 0.375759319 | 0.77057623  |
| beta-damascenone | LA3933 | 1.4473  | 0.39346101  | 0.782614296 |
| beta-damascenone | LA3934 | 1.0438  | 0.858268028 | 0.968539929 |
| beta-damascenone | LA3935 | 1.0448  | 0.817048891 | 0.959431373 |
| beta-damascenone | LA3936 | 0.7910  | 0.43290046  | 0.813917408 |
| beta-damascenone | LA3937 | 1.3185  | 0.198130455 | 0.607126492 |
| beta-damascenone | LA3938 | 0.9969  | 0.986279664 | 0.994252622 |
| beta-damascenone | LA3939 | 1.2688  | 0.307005404 | 0.729376193 |
| beta-damascenone | LA3940 | 0.8264  | 0.551153296 | 0.874302274 |
| beta-damascenone | LA3941 | 1.4302  | 0.347185666 | 0.759160206 |
| beta-damascenone | LA3942 | 0.7519  | 0.247773582 | 0.669223144 |
| beta-damascenone | LA3943 | 1.4885  | 0.04548     | 0.280017706 |
| beta-damascenone | LA3944 | 0.8761  | 0.607750867 | 0.894095025 |
| beta-damascenone | LA3945 | 1.0179  | 0.952450663 | 0.983631127 |
| beta-damascenone | LA3946 | 1.3383  | 0.241191816 | 0.661303851 |
| beta-damascenone | LA3947 | 1.3097  | 0.434080834 | 0.813917408 |



|                  |        |        |             |             |
|------------------|--------|--------|-------------|-------------|
| beta-damascenone | LA3948 | 3.1763 | 0.000851302 | 0.020412136 |
| beta-damascenone | LA3949 | 1.3705 | 0.19054687  | 0.595750303 |
| beta-damascenone | LA3950 | 1.0430 | 0.922649266 | 0.977323061 |
| beta-damascenone | LA3952 | 1.0072 | 0.97793071  | 0.991290259 |
| beta-damascenone | LA3953 | 0.7228 | 0.13456242  | 0.508254208 |
| beta-damascenone | LA3954 | 1.3729 | 0.2870742   | 0.708996814 |
| beta-damascenone | LA3955 | 1.1629 | 0.434653621 | 0.813917408 |
| beta-damascenone | LA3956 | 0.9079 | 0.597792659 | 0.890833176 |
| beta-damascenone | LA3957 | 1.3927 | 0.336899987 | 0.749691598 |
| beta-damascenone | LA3958 | 0.9152 | 0.662940903 | 0.910087458 |
| beta-damascenone | LA3959 | 0.7581 | 0.383593724 | 0.777348871 |
| beta-damascenone | LA3960 | 0.6377 | 0.299056117 | 0.722336997 |
| beta-damascenone | LA3961 | 1.0891 | 0.763135853 | 0.938962619 |
| beta-damascenone | LA3962 | 1.4657 | 0.1029326   | 0.435828549 |
| beta-damascenone | LA3963 | 1.3388 | 0.254513298 | 0.674879282 |
| beta-damascenone | LA3964 | 0.9285 | 0.726413428 | 0.925600427 |
| beta-damascenone | LA3965 | 1.0269 | 0.902207765 | 0.973435137 |
| beta-damascenone | LA3966 | 1.4170 | 0.360021882 | 0.762755031 |
| beta-damascenone | LA3967 | 1.0648 | 0.764561217 | 0.939204064 |
| beta-damascenone | LA3968 | 1.1073 | 0.600947368 | 0.890833176 |
| beta-damascenone | LA3969 | 1.6707 | 0.026896787 | 0.204405274 |
| beta-damascenone | LA3970 | 0.9722 | 0.957116212 | 0.984553949 |
| beta-damascenone | LA3971 | 1.1772 | 0.755534768 | 0.935627839 |
| beta-damascenone | LA3976 | 1.3541 | 0.485415624 | 0.84089408  |
| beta-damascenone | LA3977 | 1.9435 | 0.126396957 | 0.4942012   |
| beta-damascenone | LA3978 | 0.9619 | 0.903095649 | 0.973435137 |
| beta-damascenone | LA3979 | 1.7883 | 0.425569681 | 0.807342358 |
| beta-damascenone | LA3980 | 1.0077 | 0.969619849 | 0.988024222 |
| beta-damascenone | LA3981 | 0.9143 | 0.814553268 | 0.958297962 |
| beta-damascenone | LA3983 | 1.0064 | 0.985355606 | 0.994252622 |
| beta-damascenone | LA3984 | 1.4190 | 0.504220984 | 0.848222216 |
| beta-damascenone | LA3985 | 1.0416 | 0.95549827  | 0.984553949 |
| beta-damascenone | LA3986 | 1.5998 | 0.141058376 | 0.517125697 |
| beta-damascenone | LA3988 | 1.0948 | 0.723571877 | 0.925212938 |
| beta-damascenone | LA3989 | 0.8542 | 0.763548973 | 0.939091583 |
| beta-damascenone | LA3990 | 0.9844 | 0.96083118  | 0.984553949 |
| beta-damascenone | LA3992 | 1.8344 | 0.405739914 | 0.790942448 |
| beta-damascenone | LA3993 | 0.7068 | 0.506964508 | 0.849759808 |
| beta-damascenone | LA3994 | 0.9895 | 0.983960478 | 0.993564185 |
| beta-damascenone | LA3995 | 1.0944 | 0.68771461  | 0.91782784  |
| beta-damascenone | LA3996 | 1.0898 | 0.686435345 | 0.91782784  |
| beta-damascenone | LA3997 | 1.3409 | 0.575603622 | 0.881996536 |
| beta-damascenone | LA3998 | 0.8530 | 0.541283264 | 0.869634797 |
| beta-damascenone | LA3999 | 1.2332 | 0.459535776 | 0.826457792 |
| beta-damascenone | LA4000 | 1.1833 | 0.658334176 | 0.909481977 |
| beta-damascenone | LA4001 | 1.5847 | 0.226566451 | 0.644324665 |
| beta-damascenone | LA4002 | 1.2268 | 0.320246765 | 0.737202017 |
| beta-damascenone | LA4003 | 0.9585 | 0.863539221 | 0.968539929 |
| beta-damascenone | LA4004 | 1.1415 | 0.566862544 | 0.87990471  |
| beta-damascenone | LA4005 | 1.2215 | 0.436901267 | 0.8142009   |
| beta-damascenone | LA4006 | 1.2561 | 0.286323558 | 0.707714126 |
| beta-damascenone | LA4007 | 1.5679 | 0.093975287 | 0.417116109 |
| beta-damascenone | LA4008 | 1.2388 | 0.33603112  | 0.749586368 |
| beta-damascenone | LA4009 | 0.9380 | 0.810273893 | 0.954731657 |
| beta-damascenone | LA4010 | 0.9390 | 0.806563113 | 0.953295916 |
| beta-ionone      | LA1777 | 7.0839 | 6.84249E-08 | 9.97E-06    |
| beta-ionone      | LA3913 | 0.9298 | 0.749056841 | 0.931898617 |
| beta-ionone      | LA3914 | 1.0782 | 0.817892013 | 0.959431373 |
| beta-ionone      | LA3915 | 0.9622 | 0.886034142 | 0.970981353 |
| beta-ionone      | LA3916 | 0.4989 | 0.033677258 | 0.235206698 |
| beta-ionone      | LA3917 | 0.7881 | 0.508747485 | 0.850692516 |
| beta-ionone      | LA3918 | 0.8441 | 0.38914605  | 0.779823632 |

|             |        |        |             |             |
|-------------|--------|--------|-------------|-------------|
| beta-ionone | LA3919 | 0.7035 | 0.282698697 | 0.703871451 |
| beta-ionone | LA3920 | 0.6531 | 0.237637543 | 0.657868733 |
| beta-ionone | LA3921 | 0.8983 | 0.588119551 | 0.885653473 |
| beta-ionone | LA3922 | 0.5953 | 0.05293252  | 0.307934432 |
| beta-ionone | LA3923 | 0.8194 | 0.62862766  | 0.898759707 |
| beta-ionone | LA3924 | 1.5242 | 0.073648378 | 0.364666726 |
| beta-ionone | LA3925 | 1.1785 | 0.562639537 | 0.877064179 |
| beta-ionone | LA3926 | 1.1995 | 0.494841167 | 0.843607662 |
| beta-ionone | LA3927 | 1.1781 | 0.519133985 | 0.854488751 |
| beta-ionone | LA3929 | 1.1603 | 0.680164923 | 0.915261506 |
| beta-ionone | LA3930 | 0.3866 | 0.00857819  | 0.09942902  |
| beta-ionone | LA3931 | 0.7602 | 0.157828616 | 0.543257103 |
| beta-ionone | LA3932 | 1.0739 | 0.780679137 | 0.945579457 |
| beta-ionone | LA3933 | 0.7876 | 0.56094536  | 0.877064179 |
| beta-ionone | LA3934 | 1.3845 | 0.152923804 | 0.538253088 |
| beta-ionone | LA3935 | 1.3547 | 0.091153087 | 0.410544131 |
| beta-ionone | LA3936 | 0.7072 | 0.221606834 | 0.634940929 |
| beta-ionone | LA3937 | 0.9985 | 0.993940551 | 0.998201701 |
| beta-ionone | LA3938 | 1.2938 | 0.135632593 | 0.50987191  |
| beta-ionone | LA3939 | 0.9978 | 0.992019918 | 0.997234215 |
| beta-ionone | LA3940 | 3.7039 | 1.76368E-05 | 0.000856645 |
| beta-ionone | LA3941 | 1.3260 | 0.434128731 | 0.813917408 |
| beta-ionone | LA3942 | 0.8040 | 0.350874878 | 0.761980418 |
| beta-ionone | LA3943 | 1.3998 | 0.074345482 | 0.366275063 |
| beta-ionone | LA3944 | 0.8008 | 0.363005928 | 0.762755031 |
| beta-ionone | LA3945 | 1.0595 | 0.837743671 | 0.96155125  |
| beta-ionone | LA3946 | 0.6766 | 0.097570194 | 0.426201672 |
| beta-ionone | LA3947 | 0.7605 | 0.402392303 | 0.789846977 |
| beta-ionone | LA3948 | 1.4503 | 0.256183014 | 0.676960296 |
| beta-ionone | LA3949 | 1.2738 | 0.288943512 | 0.711252852 |
| beta-ionone | LA3950 | 0.9172 | 0.833252813 | 0.96155125  |
| beta-ionone | LA3952 | 0.9601 | 0.867880629 | 0.970339004 |
| beta-ionone | LA3953 | 0.6929 | 0.07445199  | 0.366275063 |
| beta-ionone | LA3954 | 1.4843 | 0.161807767 | 0.548846947 |
| beta-ionone | LA3955 | 0.9788 | 0.906871897 | 0.973435137 |
| beta-ionone | LA3956 | 0.9867 | 0.93833479  | 0.979979304 |
| beta-ionone | LA3957 | 0.6880 | 0.252879394 | 0.67390054  |
| beta-ionone | LA3958 | 1.0435 | 0.825350045 | 0.960073694 |
| beta-ionone | LA3959 | 0.7286 | 0.293416429 | 0.714852128 |
| beta-ionone | LA3960 | 1.1048 | 0.808236806 | 0.953768655 |
| beta-ionone | LA3961 | 1.1657 | 0.568130376 | 0.87990471  |
| beta-ionone | LA3962 | 1.3516 | 0.16327528  | 0.551459555 |
| beta-ionone | LA3963 | 1.5848 | 0.058010924 | 0.326311448 |
| beta-ionone | LA3964 | 0.9373 | 0.747491818 | 0.931898617 |
| beta-ionone | LA3965 | 1.2615 | 0.256509819 | 0.677080098 |
| beta-ionone | LA3966 | 0.9825 | 0.960937036 | 0.984553949 |
| beta-ionone | LA3967 | 0.9947 | 0.978618731 | 0.991502421 |
| beta-ionone | LA3968 | 1.1940 | 0.337549034 | 0.750108964 |
| beta-ionone | LA3969 | 1.3029 | 0.22829964  | 0.645650936 |
| beta-ionone | LA3970 | 1.1774 | 0.742253133 | 0.931622062 |
| beta-ionone | LA3971 | 0.8769 | 0.791490473 | 0.947951453 |
| beta-ionone | LA3976 | 1.1185 | 0.785648275 | 0.946659481 |
| beta-ionone | LA3977 | 0.9303 | 0.860738429 | 0.968539929 |
| beta-ionone | LA3978 | 0.6994 | 0.206144659 | 0.615536345 |
| beta-ionone | LA3979 | 2.1236 | 0.276212723 | 0.696851163 |
| beta-ionone | LA3980 | 1.2005 | 0.34047052  | 0.753863814 |
| beta-ionone | LA3981 | 1.5680 | 0.21420728  | 0.627848924 |
| beta-ionone | LA3983 | 1.1385 | 0.691972001 | 0.918070679 |
| beta-ionone | LA3984 | 0.9496 | 0.917091551 | 0.974748227 |
| beta-ionone | LA3985 | 0.7967 | 0.742715274 | 0.931819901 |
| beta-ionone | LA3986 | 1.2157 | 0.518489905 | 0.854488751 |
| beta-ionone | LA3988 | 0.9073 | 0.68837088  | 0.91782784  |

|                   |        |        |              |             |
|-------------------|--------|--------|--------------|-------------|
| beta-ionone       | LA3989 | 1.0484 | 0.924163011  | 0.977873226 |
| beta-ionone       | LA3990 | 0.7932 | 0.444899139  | 0.819621532 |
| beta-ionone       | LA3992 | 2.4243 | 0.20064514   | 0.610312255 |
| beta-ionone       | LA3993 | 0.6258 | 0.344561066  | 0.755811393 |
| beta-ionone       | LA3994 | 1.5943 | 0.347777761  | 0.759600249 |
| beta-ionone       | LA3995 | 0.7310 | 0.1411111097 | 0.517125697 |
| beta-ionone       | LA3996 | 1.0326 | 0.873877957  | 0.970384791 |
| beta-ionone       | LA3997 | 0.6648 | 0.411104995  | 0.794681797 |
| beta-ionone       | LA3998 | 1.0872 | 0.734750273  | 0.929863686 |
| beta-ionone       | LA3999 | 1.1111 | 0.694951289  | 0.919007058 |
| beta-ionone       | LA4000 | 1.3036 | 0.462369626  | 0.829253084 |
| beta-ionone       | LA4001 | 1.4805 | 0.276918632  | 0.696851163 |
| beta-ionone       | LA4002 | 1.1958 | 0.358943097  | 0.762755031 |
| beta-ionone       | LA4003 | 1.1162 | 0.63814576   | 0.900427508 |
| beta-ionone       | LA4004 | 1.0215 | 0.922707949  | 0.977323061 |
| beta-ionone       | LA4005 | 1.1612 | 0.539998508  | 0.869494047 |
| beta-ionone       | LA4006 | 1.4533 | 0.065378926  | 0.347929589 |
| beta-ionone       | LA4007 | 1.0734 | 0.780628224  | 0.945579457 |
| beta-ionone       | LA4008 | 1.2616 | 0.27082187   | 0.689488431 |
| beta-ionone       | LA4009 | 1.0495 | 0.84836117   | 0.965768296 |
| beta-ionone       | LA4010 | 0.9321 | 0.773163843  | 0.943176305 |
| cis-2-penten-1-ol | LA1777 | 4.9627 | 0.000906035  | 0.020808617 |
| cis-2-penten-1-ol | LA3913 | 0.4205 | 0.004560705  | 0.062025588 |
| cis-2-penten-1-ol | LA3914 | 0.8160 | 0.642132001  | 0.903336616 |
| cis-2-penten-1-ol | LA3915 | 0.7115 | 0.343881743  | 0.755811393 |
| cis-2-penten-1-ol | LA3916 | 0.3216 | 0.009664003  | 0.108321792 |
| cis-2-penten-1-ol | LA3917 | 0.5155 | 0.169646518  | 0.561816391 |
| cis-2-penten-1-ol | LA3918 | 1.0145 | 0.95625674   | 0.984553949 |
| cis-2-penten-1-ol | LA3919 | 1.0259 | 0.953399822  | 0.984234818 |
| cis-2-penten-1-ol | LA3920 | 0.7084 | 0.475092131  | 0.835026951 |
| cis-2-penten-1-ol | LA3921 | 0.9818 | 0.944641941  | 0.98245006  |
| cis-2-penten-1-ol | LA3922 | 1.1205 | 0.750859725  | 0.933237514 |
| cis-2-penten-1-ol | LA3923 | 0.8040 | 0.692116474  | 0.918070679 |
| cis-2-penten-1-ol | LA3924 | 0.8325 | 0.560643537  | 0.877064179 |
| cis-2-penten-1-ol | LA3925 | 0.8207 | 0.602616602  | 0.891786227 |
| cis-2-penten-1-ol | LA3926 | 1.0925 | 0.804032331  | 0.952512169 |
| cis-2-penten-1-ol | LA3927 | 1.0766 | 0.828239466  | 0.960368612 |
| cis-2-penten-1-ol | LA3929 | 0.5075 | 0.160208162  | 0.548843207 |
| cis-2-penten-1-ol | LA3930 | 0.8131 | 0.668297713  | 0.91253503  |
| cis-2-penten-1-ol | LA3931 | 0.9839 | 0.950077031  | 0.982875948 |
| cis-2-penten-1-ol | LA3932 | 0.7042 | 0.306479428  | 0.729376193 |
| cis-2-penten-1-ol | LA3933 | 0.7434 | 0.58944565   | 0.886776642 |
| cis-2-penten-1-ol | LA3934 | 1.2985 | 0.390968858  | 0.781426979 |
| cis-2-penten-1-ol | LA3935 | 2.2820 | 0.000622527  | 0.016421833 |
| cis-2-penten-1-ol | LA3936 | 1.0959 | 0.809144911  | 0.953768655 |
| cis-2-penten-1-ol | LA3937 | 1.4380 | 0.182635909  | 0.582511884 |
| cis-2-penten-1-ol | LA3938 | 1.3892 | 0.154654684  | 0.53902068  |
| cis-2-penten-1-ol | LA3939 | 1.5344 | 0.147760617  | 0.529241957 |
| cis-2-penten-1-ol | LA3940 | 0.9150 | 0.826730125  | 0.960073694 |
| cis-2-penten-1-ol | LA3941 | 0.4552 | 0.103260032  | 0.435828549 |
| cis-2-penten-1-ol | LA3942 | 0.3701 | 0.001540298  | 0.029811655 |
| cis-2-penten-1-ol | LA3943 | 1.0579 | 0.823228104  | 0.960073694 |
| cis-2-penten-1-ol | LA3944 | 0.7414 | 0.359944907  | 0.762755031 |
| cis-2-penten-1-ol | LA3945 | 1.8083 | 0.117083471  | 0.474536982 |
| cis-2-penten-1-ol | LA3946 | 1.5210 | 0.183658422  | 0.582511884 |
| cis-2-penten-1-ol | LA3947 | 1.0513 | 0.908954302  | 0.973773422 |
| cis-2-penten-1-ol | LA3948 | 1.5531 | 0.314925617  | 0.732830713 |
| cis-2-penten-1-ol | LA3949 | 0.9563 | 0.883617502  | 0.970586028 |
| cis-2-penten-1-ol | LA3950 | 1.4663 | 0.486124715  | 0.84089408  |
| cis-2-penten-1-ol | LA3952 | 0.9818 | 0.955187605  | 0.984553949 |
| cis-2-penten-1-ol | LA3953 | 1.1846 | 0.537820181  | 0.868723473 |
| cis-2-penten-1-ol | LA3954 | 1.4176 | 0.355492415  | 0.762755031 |

|                   |        |        |             |             |
|-------------------|--------|--------|-------------|-------------|
| cis-2-penten-1-ol | LA3955 | 0.8658 | 0.556361796 | 0.877064179 |
| cis-2-penten-1-ol | LA3956 | 0.7905 | 0.311675542 | 0.732830713 |
| cis-2-penten-1-ol | LA3957 | 0.4276 | 0.052379463 | 0.306464927 |
| cis-2-penten-1-ol | LA3958 | 1.1696 | 0.543797705 | 0.869848917 |
| cis-2-penten-1-ol | LA3959 | 0.8381 | 0.661241942 | 0.90958877  |
| cis-2-penten-1-ol | LA3960 | 2.0356 | 0.195983158 | 0.605766125 |
| cis-2-penten-1-ol | LA3961 | 2.4063 | 0.014722649 | 0.13968405  |
| cis-2-penten-1-ol | LA3962 | 0.6472 | 0.132411524 | 0.504661815 |
| cis-2-penten-1-ol | LA3963 | 1.2540 | 0.485797239 | 0.84089408  |
| cis-2-penten-1-ol | LA3964 | 0.9693 | 0.907841285 | 0.973773422 |
| cis-2-penten-1-ol | LA3965 | 1.1769 | 0.552105524 | 0.87525828  |
| cis-2-penten-1-ol | LA3966 | 1.8525 | 0.201880005 | 0.610979478 |
| cis-2-penten-1-ol | LA3967 | 0.9407 | 0.818379896 | 0.959431373 |
| cis-2-penten-1-ol | LA3968 | 1.1495 | 0.57325344  | 0.881536692 |
| cis-2-penten-1-ol | LA3969 | 1.2186 | 0.501003951 | 0.846175052 |
| cis-2-penten-1-ol | LA3970 | 0.6855 | 0.570020409 | 0.881385776 |
| cis-2-penten-1-ol | LA3971 | 0.6299 | 0.486825692 | 0.841212822 |
| cis-2-penten-1-ol | LA3976 | 0.8105 | 0.702941329 | 0.920138121 |
| cis-2-penten-1-ol | LA3977 | 0.6544 | 0.441647553 | 0.816739684 |
| cis-2-penten-1-ol | LA3978 | 1.0814 | 0.836114564 | 0.96155125  |
| cis-2-penten-1-ol | LA3979 | 1.7864 | 0.53062628  | 0.861769067 |
| cis-2-penten-1-ol | LA3980 | 1.5558 | 0.085063471 | 0.395583923 |
| cis-2-penten-1-ol | LA3981 | 1.8425 | 0.207258946 | 0.61685947  |
| cis-2-penten-1-ol | LA3983 | 1.0959 | 0.834472474 | 0.96155125  |
| cis-2-penten-1-ol | LA3984 | 0.9301 | 0.913175348 | 0.973773422 |
| cis-2-penten-1-ol | LA3985 | 1.1540 | 0.877122244 | 0.970384791 |
| cis-2-penten-1-ol | LA3986 | 0.5479 | 0.137368614 | 0.512154363 |
| cis-2-penten-1-ol | LA3988 | 1.0314 | 0.924217251 | 0.977873226 |
| cis-2-penten-1-ol | LA3989 | 2.0809 | 0.270391658 | 0.689488431 |
| cis-2-penten-1-ol | LA3990 | 0.6218 | 0.24178237  | 0.661303851 |
| cis-2-penten-1-ol | LA3992 | 0.1338 | 0.030017781 | 0.218181496 |
| cis-2-penten-1-ol | LA3993 | 0.8372 | 0.788741346 | 0.947232543 |
| cis-2-penten-1-ol | LA3994 | 1.1638 | 0.819496413 | 0.959431373 |
| cis-2-penten-1-ol | LA3995 | 0.4034 | 0.001480759 | 0.02961518  |
| cis-2-penten-1-ol | LA3996 | 1.3904 | 0.222711338 | 0.636912798 |
| cis-2-penten-1-ol | LA3997 | 1.2038 | 0.780179955 | 0.945579457 |
| cis-2-penten-1-ol | LA3998 | 0.6040 | 0.12709155  | 0.495414195 |
| cis-2-penten-1-ol | LA3999 | 0.5326 | 0.080008854 | 0.381945543 |
| cis-2-penten-1-ol | LA4000 | 1.0747 | 0.88141296  | 0.970384791 |
| cis-2-penten-1-ol | LA4001 | 0.5165 | 0.171401493 | 0.564921897 |
| cis-2-penten-1-ol | LA4002 | 1.5077 | 0.115645654 | 0.469954451 |
| cis-2-penten-1-ol | LA4003 | 0.8391 | 0.574981503 | 0.881926516 |
| cis-2-penten-1-ol | LA4004 | 1.0128 | 0.965435306 | 0.985400946 |
| cis-2-penten-1-ol | LA4005 | 1.1114 | 0.746211651 | 0.931898617 |
| cis-2-penten-1-ol | LA4006 | 0.8655 | 0.594302235 | 0.888328227 |
| cis-2-penten-1-ol | LA4007 | 2.0313 | 0.037590267 | 0.250489744 |
| cis-2-penten-1-ol | LA4008 | 2.1929 | 0.005518424 | 0.072149631 |
| cis-2-penten-1-ol | LA4009 | 2.0044 | 0.040157113 | 0.259242122 |
| cis-2-penten-1-ol | LA4010 | 0.6574 | 0.198655082 | 0.607884551 |
| cis-3-hexen-1-ol  | LA1777 | 1.4646 | 0.373534381 | 0.768800257 |
| cis-3-hexen-1-ol  | LA3913 | 0.5903 | 0.060618186 | 0.334219188 |
| cis-3-hexen-1-ol  | LA3914 | 0.6752 | 0.313897837 | 0.732830713 |
| cis-3-hexen-1-ol  | LA3915 | 1.1106 | 0.743214439 | 0.931898617 |
| cis-3-hexen-1-ol  | LA3916 | 0.3072 | 0.002533576 | 0.041906717 |
| cis-3-hexen-1-ol  | LA3917 | 0.2214 | 0.000471796 | 0.013244915 |
| cis-3-hexen-1-ol  | LA3918 | 0.9597 | 0.860841609 | 0.968539929 |
| cis-3-hexen-1-ol  | LA3919 | 0.4432 | 0.037296473 | 0.249731307 |
| cis-3-hexen-1-ol  | LA3920 | 0.3502 | 0.01489048  | 0.13968405  |
| cis-3-hexen-1-ol  | LA3921 | 0.8757 | 0.57402979  | 0.881536692 |
| cis-3-hexen-1-ol  | LA3922 | 0.5285 | 0.046018307 | 0.280509999 |
| cis-3-hexen-1-ol  | LA3923 | 0.3667 | 0.041332003 | 0.262808271 |
| cis-3-hexen-1-ol  | LA3924 | 1.1445 | 0.630611171 | 0.898759707 |

|                  |        |        |             |             |
|------------------|--------|--------|-------------|-------------|
| cis-3-hexen-1-ol | LA3925 | 1.2792 | 0.466636481 | 0.831478314 |
| cis-3-hexen-1-ol | LA3926 | 0.9135 | 0.775808747 | 0.944905501 |
| cis-3-hexen-1-ol | LA3927 | 0.5770 | 0.069916239 | 0.357168099 |
| cis-3-hexen-1-ol | LA3929 | 0.9352 | 0.876317311 | 0.970384791 |
| cis-3-hexen-1-ol | LA3930 | 1.0633 | 0.886575784 | 0.970981353 |
| cis-3-hexen-1-ol | LA3931 | 0.8534 | 0.493186002 | 0.843121844 |
| cis-3-hexen-1-ol | LA3932 | 0.6759 | 0.1999847   | 0.609515122 |
| cis-3-hexen-1-ol | LA3933 | 0.8184 | 0.682288971 | 0.917367707 |
| cis-3-hexen-1-ol | LA3934 | 1.0437 | 0.87457443  | 0.970384791 |
| cis-3-hexen-1-ol | LA3935 | 1.2923 | 0.231152887 | 0.650117495 |
| cis-3-hexen-1-ol | LA3936 | 0.8098 | 0.532359489 | 0.862371644 |
| cis-3-hexen-1-ol | LA3937 | 0.6846 | 0.11879568  | 0.477680395 |
| cis-3-hexen-1-ol | LA3938 | 1.3748 | 0.121975597 | 0.485364534 |
| cis-3-hexen-1-ol | LA3939 | 1.3422 | 0.263997308 | 0.682557341 |
| cis-3-hexen-1-ol | LA3940 | 1.0648 | 0.862166154 | 0.968539929 |
| cis-3-hexen-1-ol | LA3941 | 0.6872 | 0.383185694 | 0.777348871 |
| cis-3-hexen-1-ol | LA3942 | 1.1056 | 0.718787789 | 0.925212938 |
| cis-3-hexen-1-ol | LA3943 | 1.0868 | 0.710807373 | 0.923910251 |
| cis-3-hexen-1-ol | LA3944 | 0.7429 | 0.307481054 | 0.729529023 |
| cis-3-hexen-1-ol | LA3945 | 1.0981 | 0.780875584 | 0.945579457 |
| cis-3-hexen-1-ol | LA3946 | 0.8881 | 0.672653237 | 0.913734467 |
| cis-3-hexen-1-ol | LA3947 | 1.7690 | 0.143624884 | 0.523171023 |
| cis-3-hexen-1-ol | LA3948 | 1.5235 | 0.280808061 | 0.701521032 |
| cis-3-hexen-1-ol | LA3949 | 1.2600 | 0.395538079 | 0.783022521 |
| cis-3-hexen-1-ol | LA3950 | 1.3193 | 0.571395463 | 0.881536692 |
| cis-3-hexen-1-ol | LA3952 | 1.1327 | 0.669209864 | 0.912906394 |
| cis-3-hexen-1-ol | LA3953 | 1.1443 | 0.582233898 | 0.883886192 |
| cis-3-hexen-1-ol | LA3954 | 1.2414 | 0.520361718 | 0.854488751 |
| cis-3-hexen-1-ol | LA3955 | 0.9019 | 0.636127868 | 0.900427508 |
| cis-3-hexen-1-ol | LA3956 | 0.9398 | 0.764349396 | 0.939204064 |
| cis-3-hexen-1-ol | LA3957 | 0.7008 | 0.361793664 | 0.762755031 |
| cis-3-hexen-1-ol | LA3958 | 1.0617 | 0.794595678 | 0.948513004 |
| cis-3-hexen-1-ol | LA3959 | 1.1418 | 0.71195437  | 0.923910251 |
| cis-3-hexen-1-ol | LA3960 | 1.9787 | 0.163595637 | 0.551932359 |
| cis-3-hexen-1-ol | LA3961 | 0.5112 | 0.036352906 | 0.245233819 |
| cis-3-hexen-1-ol | LA3962 | 0.9337 | 0.790071183 | 0.947489068 |
| cis-3-hexen-1-ol | LA3963 | 1.4291 | 0.217395553 | 0.632949945 |
| cis-3-hexen-1-ol | LA3964 | 1.4552 | 0.117946718 | 0.476518625 |
| cis-3-hexen-1-ol | LA3965 | 1.5707 | 0.064592149 | 0.344942366 |
| cis-3-hexen-1-ol | LA3966 | 0.3273 | 0.009598232 | 0.108321792 |
| cis-3-hexen-1-ol | LA3967 | 1.2670 | 0.318278111 | 0.735597447 |
| cis-3-hexen-1-ol | LA3968 | 1.1792 | 0.45453639  | 0.825713894 |
| cis-3-hexen-1-ol | LA3969 | 0.4513 | 0.002439758 | 0.041398488 |
| cis-3-hexen-1-ol | LA3970 | 1.3483 | 0.613894779 | 0.89790427  |
| cis-3-hexen-1-ol | LA3971 | 1.4928 | 0.498790748 | 0.845127181 |
| cis-3-hexen-1-ol | LA3976 | 0.7917 | 0.63429397  | 0.899415917 |
| cis-3-hexen-1-ol | LA3977 | 1.0395 | 0.937114774 | 0.979696347 |
| cis-3-hexen-1-ol | LA3978 | 0.8470 | 0.622247617 | 0.898077541 |
| cis-3-hexen-1-ol | LA3979 | 1.4213 | 0.669766155 | 0.912906394 |
| cis-3-hexen-1-ol | LA3980 | 1.2198 | 0.384641873 | 0.777413561 |
| cis-3-hexen-1-ol | LA3981 | 1.6096 | 0.270282858 | 0.689488431 |
| cis-3-hexen-1-ol | LA3983 | 1.0003 | 0.999437093 | 0.999445043 |
| cis-3-hexen-1-ol | LA3984 | 1.6213 | 0.414664817 | 0.7985364   |
| cis-3-hexen-1-ol | LA3985 | 1.4488 | 0.653416076 | 0.907895049 |
| cis-3-hexen-1-ol | LA3986 | 0.4616 | 0.0322893   | 0.229246538 |
| cis-3-hexen-1-ol | LA3988 | 1.2506 | 0.43961094  | 0.815452569 |
| cis-3-hexen-1-ol | LA3989 | 1.5392 | 0.466588013 | 0.831478314 |
| cis-3-hexen-1-ol | LA3990 | 0.7181 | 0.359910584 | 0.762755031 |
| cis-3-hexen-1-ol | LA3992 | 1.6501 | 0.543696328 | 0.869848917 |
| cis-3-hexen-1-ol | LA3993 | 0.5640 | 0.332747598 | 0.747034226 |
| cis-3-hexen-1-ol | LA3994 | 1.0664 | 0.913596166 | 0.973773422 |
| cis-3-hexen-1-ol | LA3995 | 0.4676 | 0.002807016 | 0.044736818 |



|                  |        |        |             |             |
|------------------|--------|--------|-------------|-------------|
| cis-3-hexen-1-ol | LA3996 | 1.9280 | 0.006523444 | 0.080816756 |
| cis-3-hexen-1-ol | LA3997 | 1.6727 | 0.385174207 | 0.777725209 |
| cis-3-hexen-1-ol | LA3998 | 0.7851 | 0.411029683 | 0.794681797 |
| cis-3-hexen-1-ol | LA3999 | 0.3616 | 0.001549037 | 0.029811655 |
| cis-3-hexen-1-ol | LA4000 | 1.1792 | 0.701503457 | 0.919315023 |
| cis-3-hexen-1-ol | LA4001 | 0.5070 | 0.114551297 | 0.466746962 |
| cis-3-hexen-1-ol | LA4002 | 1.2198 | 0.39271463  | 0.782614296 |
| cis-3-hexen-1-ol | LA4003 | 0.8679 | 0.611423506 | 0.8969108   |
| cis-3-hexen-1-ol | LA4004 | 0.6237 | 0.071021269 | 0.358867191 |
| cis-3-hexen-1-ol | LA4005 | 0.7771 | 0.385985778 | 0.777725209 |
| cis-3-hexen-1-ol | LA4006 | 1.1463 | 0.572016835 | 0.881536692 |
| cis-3-hexen-1-ol | LA4007 | 1.2906 | 0.400414842 | 0.78816956  |
| cis-3-hexen-1-ol | LA4008 | 1.2092 | 0.45027055  | 0.822093009 |
| cis-3-hexen-1-ol | LA4009 | 1.7410 | 0.066218587 | 0.351176562 |
| cis-3-hexen-1-ol | LA4010 | 0.9637 | 0.898747493 | 0.973435137 |
| cis-3-hexenal    | LA1777 | 2.2072 | 0.091771854 | 0.411293726 |
| cis-3-hexenal    | LA3913 | 0.3653 | 0.000730091 | 0.018617321 |
| cis-3-hexenal    | LA3914 | 0.5586 | 0.216333554 | 0.63158377  |
| cis-3-hexenal    | LA3915 | 0.8297 | 0.594285742 | 0.888328227 |
| cis-3-hexenal    | LA3916 | 0.2726 | 0.002384333 | 0.041220672 |
| cis-3-hexenal    | LA3917 | 0.1680 | 0.000159179 | 0.00559871  |
| cis-3-hexenal    | LA3918 | 0.5764 | 0.032133802 | 0.22920614  |
| cis-3-hexenal    | LA3919 | 0.2108 | 0.000283445 | 0.008587542 |
| cis-3-hexenal    | LA3920 | 0.1893 | 0.000426741 | 0.012556033 |
| cis-3-hexenal    | LA3921 | 0.7772 | 0.329504261 | 0.743729554 |
| cis-3-hexenal    | LA3922 | 0.7275 | 0.362535713 | 0.762755031 |
| cis-3-hexenal    | LA3923 | 0.5492 | 0.264998294 | 0.682576622 |
| cis-3-hexenal    | LA3924 | 0.4121 | 0.003996876 | 0.056481536 |
| cis-3-hexenal    | LA3925 | 0.6752 | 0.288706822 | 0.711252852 |
| cis-3-hexenal    | LA3926 | 0.8636 | 0.673297334 | 0.91405938  |
| cis-3-hexenal    | LA3927 | 0.3652 | 0.002462263 | 0.041398488 |
| cis-3-hexenal    | LA3929 | 0.4268 | 0.07076442  | 0.358508485 |
| cis-3-hexenal    | LA3930 | 1.2714 | 0.609977277 | 0.896077997 |
| cis-3-hexenal    | LA3931 | 0.8876 | 0.637527205 | 0.900427508 |
| cis-3-hexenal    | LA3932 | 0.6903 | 0.267672063 | 0.687144725 |
| cis-3-hexenal    | LA3933 | 0.7825 | 0.64718736  | 0.905529102 |
| cis-3-hexenal    | LA3934 | 0.8822 | 0.672759397 | 0.913734467 |
| cis-3-hexenal    | LA3935 | 1.4073 | 0.144936969 | 0.524860503 |
| cis-3-hexenal    | LA3936 | 0.6045 | 0.173570479 | 0.56865703  |
| cis-3-hexenal    | LA3937 | 1.4653 | 0.150644212 | 0.532762115 |
| cis-3-hexenal    | LA3938 | 1.6313 | 0.029932209 | 0.218077523 |
| cis-3-hexenal    | LA3939 | 0.9636 | 0.89759762  | 0.973435137 |
| cis-3-hexenal    | LA3940 | 1.8477 | 0.121056856 | 0.482335911 |
| cis-3-hexenal    | LA3941 | 0.5164 | 0.16057116  | 0.548843207 |
| cis-3-hexenal    | LA3942 | 0.4098 | 0.003541961 | 0.053215665 |
| cis-3-hexenal    | LA3943 | 0.5998 | 0.037743823 | 0.250533836 |
| cis-3-hexenal    | LA3944 | 0.2471 | 1.29708E-05 | 0.000684406 |
| cis-3-hexenal    | LA3945 | 1.0579 | 0.878458661 | 0.970384791 |
| cis-3-hexenal    | LA3946 | 0.8414 | 0.574439269 | 0.881536692 |
| cis-3-hexenal    | LA3947 | 1.5828 | 0.281899167 | 0.702949472 |
| cis-3-hexenal    | LA3948 | 0.5739 | 0.193793152 | 0.602037609 |
| cis-3-hexenal    | LA3949 | 0.8501 | 0.585493705 | 0.885160207 |
| cis-3-hexenal    | LA3950 | 0.7417 | 0.576990329 | 0.882795203 |
| cis-3-hexenal    | LA3952 | 0.6125 | 0.124887784 | 0.492068006 |
| cis-3-hexenal    | LA3953 | 0.7667 | 0.321888682 | 0.738365343 |
| cis-3-hexenal    | LA3954 | 0.5267 | 0.081914201 | 0.38681706  |
| cis-3-hexenal    | LA3955 | 0.8296 | 0.434223311 | 0.813917408 |
| cis-3-hexenal    | LA3956 | 0.6363 | 0.046230922 | 0.281245768 |
| cis-3-hexenal    | LA3957 | 0.7605 | 0.521116298 | 0.854563704 |
| cis-3-hexenal    | LA3958 | 1.0345 | 0.89282385  | 0.973435137 |
| cis-3-hexenal    | LA3959 | 1.3525 | 0.44242918  | 0.816778568 |
| cis-3-hexenal    | LA3960 | 1.3420 | 0.58302487  | 0.884071408 |



|               |        |        |             |             |
|---------------|--------|--------|-------------|-------------|
| cis-3-hexenal | LA3961 | 0.8572 | 0.660183418 | 0.90958877  |
| cis-3-hexenal | LA3962 | 0.6029 | 0.072863695 | 0.363711069 |
| cis-3-hexenal | LA3963 | 0.7869 | 0.449216805 | 0.821803266 |
| cis-3-hexenal | LA3964 | 1.2671 | 0.366989479 | 0.762798067 |
| cis-3-hexenal | LA3965 | 1.2028 | 0.489388529 | 0.841212822 |
| cis-3-hexenal | LA3966 | 0.7276 | 0.499479469 | 0.845357951 |
| cis-3-hexenal | LA3967 | 1.2400 | 0.407071765 | 0.79120714  |
| cis-3-hexenal | LA3968 | 0.9294 | 0.761289321 | 0.938912768 |
| cis-3-hexenal | LA3969 | 0.3008 | 3.04443E-05 | 0.001276158 |
| cis-3-hexenal | LA3970 | 1.0814 | 0.903943554 | 0.973435137 |
| cis-3-hexenal | LA3971 | 2.1140 | 0.248303251 | 0.669223144 |
| cis-3-hexenal | LA3976 | 0.5464 | 0.260951113 | 0.680742034 |
| cis-3-hexenal | LA3977 | 0.7662 | 0.620146848 | 0.898077541 |
| cis-3-hexenal | LA3978 | 0.4542 | 0.032620028 | 0.231058532 |
| cis-3-hexenal | LA3979 | 1.0684 | 0.941576829 | 0.982347459 |
| cis-3-hexenal | LA3980 | 1.0070 | 0.977700756 | 0.991290259 |
| cis-3-hexenal | LA3981 | 1.1541 | 0.76157203  | 0.938912768 |
| cis-3-hexenal | LA3983 | 1.2953 | 0.54476554  | 0.870032647 |
| cis-3-hexenal | LA3984 | 1.3368 | 0.654254746 | 0.907945362 |
| cis-3-hexenal | LA3985 | 0.6079 | 0.581707809 | 0.883886192 |
| cis-3-hexenal | LA3986 | 0.5252 | 0.102980136 | 0.435828549 |
| cis-3-hexenal | LA3988 | 0.9227 | 0.799426991 | 0.951686433 |
| cis-3-hexenal | LA3989 | 0.9559 | 0.944529589 | 0.98245006  |
| cis-3-hexenal | LA3990 | 1.0012 | 0.997633676 | 0.999168573 |
| cis-3-hexenal | LA3992 | 0.7485 | 0.748259936 | 0.931898617 |
| cis-3-hexenal | LA3993 | 0.3419 | 0.097413351 | 0.426201672 |
| cis-3-hexenal | LA3994 | 0.7844 | 0.707896381 | 0.922681449 |
| cis-3-hexenal | LA3995 | 0.2443 | 4.77014E-07 | 4.42E-05    |
| cis-3-hexenal | LA3996 | 1.0411 | 0.878536732 | 0.970384791 |
| cis-3-hexenal | LA3997 | 1.3397 | 0.651864125 | 0.907895049 |
| cis-3-hexenal | LA3998 | 0.7015 | 0.271063589 | 0.689488431 |
| cis-3-hexenal | LA3999 | 0.2816 | 0.000318018 | 0.009447913 |
| cis-3-hexenal | LA4000 | 1.1101 | 0.824423371 | 0.960073694 |
| cis-3-hexenal | LA4001 | 0.4165 | 0.063107587 | 0.340939803 |
| cis-3-hexenal | LA4002 | 1.3726 | 0.213250485 | 0.626244227 |
| cis-3-hexenal | LA4003 | 0.6427 | 0.147632621 | 0.529241957 |
| cis-3-hexenal | LA4004 | 0.5832 | 0.059515195 | 0.330519958 |
| cis-3-hexenal | LA4005 | 0.3742 | 0.002075911 | 0.037366398 |
| cis-3-hexenal | LA4006 | 1.0346 | 0.897625275 | 0.973435137 |
| cis-3-hexenal | LA4007 | 0.9102 | 0.776922378 | 0.944905595 |
| cis-3-hexenal | LA4008 | 1.7875 | 0.035100147 | 0.240282886 |
| cis-3-hexenal | LA4009 | 1.0558 | 0.869224035 | 0.970339004 |
| cis-3-hexenal | LA4010 | 0.5525 | 0.062454279 | 0.340053548 |
| geranial      | LA1777 | 1.3620 | 0.583396959 | 0.884197471 |
| geranial      | LA3913 | 1.9765 | 0.056359857 | 0.319965051 |
| geranial      | LA3914 | 2.1353 | 0.138836389 | 0.51471811  |
| geranial      | LA3915 | 2.3098 | 0.046974605 | 0.283522224 |
| geranial      | LA3916 | 1.2172 | 0.701210419 | 0.919315023 |
| geranial      | LA3917 | 0.8519 | 0.802953987 | 0.952293751 |
| geranial      | LA3918 | 0.8272 | 0.538336697 | 0.868723473 |
| geranial      | LA3919 | 0.9968 | 0.995008051 | 0.998270372 |
| geranial      | LA3920 | 1.1653 | 0.786635668 | 0.947232543 |
| geranial      | LA3921 | 0.9643 | 0.906703074 | 0.973435137 |
| geranial      | LA3922 | 0.6190 | 0.253035527 | 0.67390054  |
| geranial      | LA3923 | 0.1474 | 0.00308997  | 0.048439097 |
| geranial      | LA3924 | 0.8410 | 0.638679039 | 0.900427508 |
| geranial      | LA3925 | 0.9059 | 0.83483991  | 0.96155125  |
| geranial      | LA3926 | 0.7538 | 0.498348925 | 0.844875733 |
| geranial      | LA3927 | 1.0396 | 0.922278315 | 0.977323061 |
| geranial      | LA3929 | 3.8899 | 0.016440219 | 0.148837486 |
| geranial      | LA3930 | 1.2241 | 0.72056622  | 0.925212938 |
| geranial      | LA3931 | 1.0698 | 0.82434811  | 0.960073694 |

|          |        |        |             |             |
|----------|--------|--------|-------------|-------------|
| geranial | LA3932 | 0.5986 | 0.201225402 | 0.610862828 |
| geranial | LA3933 | 0.9553 | 0.943294609 | 0.98245006  |
| geranial | LA3934 | 1.4016 | 0.343673355 | 0.755811393 |
| geranial | LA3935 | 1.2967 | 0.355768351 | 0.762755031 |
| geranial | LA3936 | 1.3911 | 0.457155787 | 0.826457792 |
| geranial | LA3937 | 1.5715 | 0.156719793 | 0.541765267 |
| geranial | LA3938 | 1.5998 | 0.082348103 | 0.387669531 |
| geranial | LA3939 | 1.0604 | 0.86535561  | 0.968539929 |
| geranial | LA3940 | 2.1629 | 0.104706008 | 0.439607487 |
| geranial | LA3941 | 1.1676 | 0.78391367  | 0.946467831 |
| geranial | LA3942 | 1.5145 | 0.257334691 | 0.677080098 |
| geranial | LA3943 | 1.6587 | 0.08651999  | 0.398830464 |
| geranial | LA3944 | 0.7550 | 0.462593142 | 0.829253084 |
| geranial | LA3945 | 0.9714 | 0.94771244  | 0.982875948 |
| geranial | LA3946 | 0.5907 | 0.15406278  | 0.538779551 |
| geranial | LA3947 | 2.6965 | 0.053057479 | 0.308075685 |
| geranial | LA3948 | 0.7061 | 0.497455585 | 0.844594188 |
| geranial | LA3949 | 1.4906 | 0.264199593 | 0.682557341 |
| geranial | LA3950 | 1.0412 | 0.950003513 | 0.982875948 |
| geranial | LA3952 | 1.1460 | 0.722089056 | 0.925212938 |
| geranial | LA3953 | 1.0321 | 0.92180566  | 0.977323061 |
| geranial | LA3954 | 2.2418 | 0.0681038   | 0.355021513 |
| geranial | LA3955 | 1.5738 | 0.114106385 | 0.466303176 |
| geranial | LA3956 | 1.1455 | 0.617436512 | 0.89798276  |
| geranial | LA3957 | 1.1970 | 0.725511704 | 0.925600427 |
| geranial | LA3958 | 1.6378 | 0.102734225 | 0.435828549 |
| geranial | LA3959 | 1.4788 | 0.407238969 | 0.79120714  |
| geranial | LA3960 | 1.5262 | 0.511094952 | 0.850963952 |
| geranial | LA3961 | 1.0146 | 0.972552033 | 0.98833422  |
| geranial | LA3962 | 1.1345 | 0.71678655  | 0.924993642 |
| geranial | LA3963 | 1.2604 | 0.542715173 | 0.869848917 |
| geranial | LA3964 | 1.3906 | 0.295457815 | 0.718110337 |
| geranial | LA3965 | 2.1496 | 0.017212583 | 0.153558321 |
| geranial | LA3966 | 1.0781 | 0.894239444 | 0.973435137 |
| geranial | LA3967 | 1.5316 | 0.171324859 | 0.564921897 |
| geranial | LA3968 | 1.0445 | 0.880507555 | 0.970384791 |
| geranial | LA3969 | 1.1779 | 0.63409281  | 0.899415917 |
| geranial | LA3970 | 0.7239 | 0.677963851 | 0.914681245 |
| geranial | LA3971 | 1.2089 | 0.807397271 | 0.953768655 |
| geranial | LA3976 | 0.2050 | 0.014227203 | 0.137335146 |
| geranial | LA3977 | 1.9149 | 0.314129365 | 0.732830713 |
| geranial | LA3978 | 0.5467 | 0.202294445 | 0.610979478 |
| geranial | LA3979 | 6.1767 | 0.093074072 | 0.414565736 |
| geranial | LA3980 | 1.4570 | 0.21016189  | 0.620240317 |
| geranial | LA3981 | 1.6329 | 0.387366133 | 0.778908117 |
| geranial | LA3983 | 1.6418 | 0.333839614 | 0.748369509 |
| geranial | LA3984 | 3.8530 | 0.083326685 | 0.3886885   |
| geranial | LA3985 | 1.9258 | 0.545817086 | 0.871108541 |
| geranial | LA3986 | 1.0673 | 0.890661697 | 0.972324221 |
| geranial | LA3988 | 1.9437 | 0.08071613  | 0.383937025 |
| geranial | LA3989 | 1.7782 | 0.4595834   | 0.826457792 |
| geranial | LA3990 | 1.8272 | 0.204714708 | 0.613420987 |
| geranial | LA3992 | 2.2138 | 0.463389843 | 0.82970914  |
| geranial | LA3993 | 0.5325 | 0.417183695 | 0.799348623 |
| geranial | LA3994 | 3.7764 | 0.088018569 | 0.402643605 |
| geranial | LA3995 | 1.5150 | 0.212849615 | 0.625667456 |
| geranial | LA3996 | 1.5353 | 0.175621231 | 0.571095608 |
| geranial | LA3997 | 1.2691 | 0.759402364 | 0.938800538 |
| geranial | LA3998 | 2.6270 | 0.012655756 | 0.127390176 |
| geranial | LA3999 | 1.7901 | 0.166791654 | 0.55597218  |
| geranial | LA4000 | 0.2303 | 0.009534487 | 0.108057519 |
| geranial | LA4001 | 1.8320 | 0.284265591 | 0.706049276 |

|                |        |        |             |             |
|----------------|--------|--------|-------------|-------------|
| geranial       | LA4002 | 1.6204 | 0.114204285 | 0.466303176 |
| geranial       | LA4003 | 0.4714 | 0.04033499  | 0.259296364 |
| geranial       | LA4004 | 0.7502 | 0.402520382 | 0.789846977 |
| geranial       | LA4005 | 1.6509 | 0.189805733 | 0.59447855  |
| geranial       | LA4006 | 1.1134 | 0.735078515 | 0.929863686 |
| geranial       | LA4007 | 0.7924 | 0.559332312 | 0.877064179 |
| geranial       | LA4008 | 1.1074 | 0.757531525 | 0.936963002 |
| geranial       | LA4009 | 1.4711 | 0.330019344 | 0.744185109 |
| geranial       | LA4010 | 0.5158 | 0.083262316 | 0.3886885   |
| geranylacetone | LA1777 | 3.0212 | 0.041396597 | 0.262808271 |
| geranylacetone | LA3913 | 1.2127 | 0.573761312 | 0.881536692 |
| geranylacetone | LA3914 | 0.6931 | 0.456488754 | 0.826457792 |
| geranylacetone | LA3915 | 1.0447 | 0.913879403 | 0.973773422 |
| geranylacetone | LA3916 | 0.6028 | 0.304024462 | 0.727870907 |
| geranylacetone | LA3917 | 0.2262 | 0.006280863 | 0.0787682   |
| geranylacetone | LA3918 | 0.7557 | 0.344561076 | 0.755811393 |
| geranylacetone | LA3919 | 0.7581 | 0.574200285 | 0.881536692 |
| geranylacetone | LA3920 | 0.6245 | 0.386125337 | 0.777725209 |
| geranylacetone | LA3921 | 0.6555 | 0.156894813 | 0.541765267 |
| geranylacetone | LA3922 | 0.0520 | 5.57812E-13 | 3.41E-10    |
| geranylacetone | LA3923 | 0.0163 | 5.81587E-11 | 1.67E-08    |
| geranylacetone | LA3924 | 0.8442 | 0.63291154  | 0.899415917 |
| geranylacetone | LA3925 | 0.9524 | 0.909063186 | 0.973773422 |
| geranylacetone | LA3926 | 0.4069 | 0.025271736 | 0.197413082 |
| geranylacetone | LA3927 | 0.8012 | 0.562633086 | 0.877064179 |
| geranylacetone | LA3929 | 0.8269 | 0.726477982 | 0.925600427 |
| geranylacetone | LA3930 | 0.8845 | 0.82118441  | 0.960073694 |
| geranylacetone | LA3931 | 0.8798 | 0.661032334 | 0.90958877  |
| geranylacetone | LA3932 | 0.5079 | 0.079300078 | 0.379746852 |
| geranylacetone | LA3933 | 1.2825 | 0.687384163 | 0.91782784  |
| geranylacetone | LA3934 | 1.0507 | 0.885157562 | 0.970981353 |
| geranylacetone | LA3935 | 0.9043 | 0.709781467 | 0.923602575 |
| geranylacetone | LA3936 | 0.9909 | 0.982886024 | 0.993401375 |
| geranylacetone | LA3937 | 0.7812 | 0.420618242 | 0.803929932 |
| geranylacetone | LA3938 | 1.6868 | 0.04441037  | 0.276027337 |
| geranylacetone | LA3939 | 0.7504 | 0.388181333 | 0.778908117 |
| geranylacetone | LA3940 | 1.0766 | 0.871602321 | 0.970384791 |
| geranylacetone | LA3941 | 0.8112 | 0.700170102 | 0.919304287 |
| geranylacetone | LA3942 | 0.8051 | 0.538131587 | 0.868723473 |
| geranylacetone | LA3943 | 1.1958 | 0.528349749 | 0.860823737 |
| geranylacetone | LA3944 | 0.3874 | 0.010061917 | 0.110480627 |
| geranylacetone | LA3945 | 0.4665 | 0.073109623 | 0.363711069 |
| geranylacetone | LA3946 | 0.3132 | 0.00111011  | 0.023922089 |
| geranylacetone | LA3947 | 1.5870 | 0.348290629 | 0.760047884 |
| geranylacetone | LA3948 | 1.3000 | 0.594541245 | 0.888328227 |
| geranylacetone | LA3949 | 1.0391 | 0.911069084 | 0.973773422 |
| geranylacetone | LA3950 | 0.7418 | 0.629040201 | 0.898759707 |
| geranylacetone | LA3952 | 1.0586 | 0.877171163 | 0.970384791 |
| geranylacetone | LA3953 | 1.1966 | 0.561856043 | 0.877064179 |
| geranylacetone | LA3954 | 1.1371 | 0.762403741 | 0.938912768 |
| geranylacetone | LA3955 | 1.0049 | 0.985797723 | 0.994252622 |
| geranylacetone | LA3956 | 0.6928 | 0.160528213 | 0.548843207 |
| geranylacetone | LA3957 | 0.5475 | 0.221302743 | 0.634940929 |
| geranylacetone | LA3958 | 0.7963 | 0.432840084 | 0.813917408 |
| geranylacetone | LA3959 | 0.6068 | 0.270900286 | 0.689488431 |
| geranylacetone | LA3960 | 1.6112 | 0.44050428  | 0.815452569 |
| geranylacetone | LA3961 | 0.6623 | 0.308431712 | 0.731061997 |
| geranylacetone | LA3962 | 0.9798 | 0.949982835 | 0.982875948 |
| geranylacetone | LA3963 | 0.7722 | 0.479440088 | 0.838051446 |
| geranylacetone | LA3964 | 1.0336 | 0.91298327  | 0.973773422 |
| geranylacetone | LA3965 | 1.4164 | 0.258938911 | 0.678384476 |
| geranylacetone | LA3966 | 0.6757 | 0.470785482 | 0.834110248 |

|                |        |         |             |             |
|----------------|--------|---------|-------------|-------------|
| geranylacetone | LA3967 | 1.0219  | 0.942250007 | 0.98245006  |
| geranylacetone | LA3968 | 0.7746  | 0.358798148 | 0.762755031 |
| geranylacetone | LA3969 | 0.8050  | 0.511729696 | 0.850963952 |
| geranylacetone | LA3970 | 1.2728  | 0.747110406 | 0.931898617 |
| geranylacetone | LA3971 | 1.5501  | 0.557869927 | 0.877064179 |
| geranylacetone | LA3976 | 0.2873  | 0.044598459 | 0.276257661 |
| geranylacetone | LA3977 | 1.4323  | 0.562363819 | 0.877064179 |
| geranylacetone | LA3978 | 0.5608  | 0.17450597  | 0.569891428 |
| geranylacetone | LA3979 | 0.9993  | 0.999445043 | 0.999445043 |
| geranylacetone | LA3980 | 1.5320  | 0.139623829 | 0.515924738 |
| geranylacetone | LA3981 | 0.8111  | 0.700995796 | 0.919315023 |
| geranylacetone | LA3983 | 1.4106  | 0.485278932 | 0.84089408  |
| geranylacetone | LA3984 | 1.2135  | 0.795832811 | 0.948513004 |
| geranylacetone | LA3985 | 2.0787  | 0.482907685 | 0.839381895 |
| geranylacetone | LA3986 | 1.4903  | 0.381113786 | 0.775886941 |
| geranylacetone | LA3988 | 2.2813  | 0.024227    | 0.192557455 |
| geranylacetone | LA3989 | 1.3094  | 0.718549938 | 0.925212938 |
| geranylacetone | LA3990 | 1.0160  | 0.972342334 | 0.98833422  |
| geranylacetone | LA3992 | 1.2398  | 0.836480563 | 0.96155125  |
| geranylacetone | LA3993 | 0.4274  | 0.255035566 | 0.675678642 |
| geranylacetone | LA3994 | 1.6764  | 0.489761302 | 0.841212822 |
| geranylacetone | LA3995 | 1.0836  | 0.802026686 | 0.952293751 |
| geranylacetone | LA3996 | 1.1610  | 0.623473041 | 0.898077541 |
| geranylacetone | LA3997 | 1.3279  | 0.704568024 | 0.921272668 |
| geranylacetone | LA3998 | 1.3157  | 0.460304947 | 0.826603954 |
| geranylacetone | LA3999 | 1.1768  | 0.687361743 | 0.91782784  |
| geranylacetone | LA4000 | 0.4477  | 0.13930213  | 0.515434725 |
| geranylacetone | LA4001 | 1.7785  | 0.28934248  | 0.711252852 |
| geranylacetone | LA4002 | 1.3471  | 0.310170552 | 0.732434594 |
| geranylacetone | LA4003 | 0.3875  | 0.007212938 | 0.087068577 |
| geranylacetone | LA4004 | 0.7058  | 0.290950893 | 0.712336922 |
| geranylacetone | LA4005 | 0.8524  | 0.663832706 | 0.910087458 |
| geranylacetone | LA4006 | 1.3981  | 0.272317975 | 0.691529463 |
| geranylacetone | LA4007 | 1.3026  | 0.490121088 | 0.841212822 |
| geranylacetone | LA4008 | 0.8829  | 0.695076336 | 0.919007058 |
| geranylacetone | LA4009 | 0.7284  | 0.405506515 | 0.790942448 |
| geranylacetone | LA4010 | 1.3007  | 0.473937566 | 0.835017119 |
| guaiacol       | LA1777 | 2.8542  | 0.150365731 | 0.532762115 |
| guaiacol       | LA3913 | 7.2962  | 1.85219E-05 | 0.000871954 |
| guaiacol       | LA3914 | 9.2530  | 0.000820084 | 0.020254165 |
| guaiacol       | LA3915 | 13.0664 | 2.77216E-06 | 0.000192791 |
| guaiacol       | LA3916 | 2.5999  | 0.149574181 | 0.530970991 |
| guaiacol       | LA3917 | 0.8483  | 0.821793775 | 0.960073694 |
| guaiacol       | LA3918 | 0.5709  | 0.160104491 | 0.548843207 |
| guaiacol       | LA3919 | 1.2835  | 0.706738019 | 0.92238941  |
| guaiacol       | LA3920 | 0.9341  | 0.925703279 | 0.978377595 |
| guaiacol       | LA3921 | 0.5381  | 0.122863722 | 0.486998691 |
| guaiacol       | LA3922 | 1.2392  | 0.692642593 | 0.918070679 |
| guaiacol       | LA3923 | 0.2028  | 0.056246841 | 0.319965051 |
| guaiacol       | LA3924 | 1.7568  | 0.237778699 | 0.657868733 |
| guaiacol       | LA3925 | 1.3879  | 0.568527604 | 0.879966853 |
| guaiacol       | LA3926 | 1.9416  | 0.219456074 | 0.634940929 |
| guaiacol       | LA3927 | 1.5691  | 0.382045119 | 0.776266975 |
| guaiacol       | LA3929 | 30.2447 | 3.64128E-06 | 0.000222846 |
| guaiacol       | LA3930 | 2.0764  | 0.317827445 | 0.735597447 |
| guaiacol       | LA3931 | 1.1952  | 0.650169869 | 0.907627646 |
| guaiacol       | LA3932 | 1.3134  | 0.599564252 | 0.890833176 |
| guaiacol       | LA3933 | 0.4643  | 0.356745061 | 0.762755031 |
| guaiacol       | LA3934 | 1.4560  | 0.41526495  | 0.798923014 |
| guaiacol       | LA3935 | 2.3601  | 0.018490904 | 0.161247511 |
| guaiacol       | LA3936 | 1.4967  | 0.482601465 | 0.839381895 |
| guaiacol       | LA3937 | 1.8153  | 0.148758493 | 0.529919661 |

|          |        |         |             |             |
|----------|--------|---------|-------------|-------------|
| guaiacol | LA3938 | 1.0329  | 0.926259148 | 0.978377595 |
| guaiacol | LA3939 | 0.9354  | 0.881419429 | 0.970384791 |
| guaiacol | LA3940 | 0.5998  | 0.40576255  | 0.790942448 |
| guaiacol | LA3941 | 2.1440  | 0.29708308  | 0.720867526 |
| guaiacol | LA3942 | 0.6684  | 0.395402705 | 0.783022521 |
| guaiacol | LA3943 | 0.8674  | 0.709448831 | 0.923602575 |
| guaiacol | LA3944 | 0.8053  | 0.661688269 | 0.90958877  |
| guaiacol | LA3945 | 5.9853  | 0.001822146 | 0.033189088 |
| guaiacol | LA3946 | 1.4102  | 0.47172831  | 0.834110248 |
| guaiacol | LA3947 | 2.1613  | 0.244966641 | 0.666783496 |
| guaiacol | LA3948 | 0.5378  | 0.349924465 | 0.761980418 |
| guaiacol | LA3949 | 0.5764  | 0.233666035 | 0.652967925 |
| guaiacol | LA3950 | 2.5305  | 0.264786361 | 0.682576622 |
| guaiacol | LA3952 | 1.4268  | 0.473503123 | 0.835017119 |
| guaiacol | LA3953 | 0.6941  | 0.380720909 | 0.775636472 |
| guaiacol | LA3954 | 0.8654  | 0.800390708 | 0.951883236 |
| guaiacol | LA3955 | 0.7587  | 0.456752448 | 0.826457792 |
| guaiacol | LA3956 | 0.5313  | 0.072522033 | 0.362610165 |
| guaiacol | LA3957 | 0.1978  | 0.014643328 | 0.139590603 |
| guaiacol | LA3958 | 0.1489  | 1.31751E-06 | 0.000103374 |
| guaiacol | LA3959 | 1.2621  | 0.703033636 | 0.920138121 |
| guaiacol | LA3960 | 1.2702  | 0.773798719 | 0.943176305 |
| guaiacol | LA3961 | 6.0422  | 0.000989761 | 0.022107071 |
| guaiacol | LA3962 | 1.1994  | 0.677950099 | 0.914681245 |
| guaiacol | LA3963 | 1.5778  | 0.35396636  | 0.762755031 |
| guaiacol | LA3964 | 2.6892  | 0.015405623 | 0.142420563 |
| guaiacol | LA3965 | 2.6428  | 0.019368129 | 0.166219867 |
| guaiacol | LA3966 | 0.9545  | 0.949254751 | 0.982875948 |
| guaiacol | LA3967 | 1.5000  | 0.314442382 | 0.732830713 |
| guaiacol | LA3968 | 0.8947  | 0.766492469 | 0.940443847 |
| guaiacol | LA3969 | 2.9599  | 0.014927021 | 0.13968405  |
| guaiacol | LA3970 | 2.3738  | 0.390615971 | 0.781231942 |
| guaiacol | LA3971 | 0.8968  | 0.913835126 | 0.973773422 |
| guaiacol | LA3976 | 0.7199  | 0.69378944  | 0.918420831 |
| guaiacol | LA3977 | 6.2552  | 0.028296066 | 0.211701618 |
| guaiacol | LA3978 | 1.4162  | 0.54364449  | 0.869848917 |
| guaiacol | LA3979 | 0.4107  | 0.525465573 | 0.857559815 |
| guaiacol | LA3980 | 1.1876  | 0.658033622 | 0.909477364 |
| guaiacol | LA3981 | 0.9172  | 0.906252099 | 0.973435137 |
| guaiacol | LA3983 | 1.2602  | 0.727428569 | 0.925946399 |
| guaiacol | LA3984 | 1.3430  | 0.769561841 | 0.94243751  |
| guaiacol | LA3985 | 4.6549  | 0.273375559 | 0.693639478 |
| guaiacol | LA3986 | 1.9677  | 0.269685173 | 0.689488431 |
| guaiacol | LA3988 | 1.6312  | 0.319932901 | 0.737202017 |
| guaiacol | LA3989 | 2.7151  | 0.32128332  | 0.738083303 |
| guaiacol | LA3990 | 0.5123  | 0.276729695 | 0.696851163 |
| guaiacol | LA3992 | 2.4726  | 0.518510714 | 0.854488751 |
| guaiacol | LA3993 | 0.4980  | 0.487820742 | 0.841212822 |
| guaiacol | LA3994 | 1.4823  | 0.695862534 | 0.919007058 |
| guaiacol | LA3995 | 32.6381 | 2.34992E-15 | 1.80E-12    |
| guaiacol | LA3996 | 1.4516  | 0.362669807 | 0.762755031 |
| guaiacol | LA3997 | 0.5944  | 0.605352206 | 0.89289183  |
| guaiacol | LA3998 | 14.7937 | 9.39811E-08 | 1.20E-05    |
| guaiacol | LA3999 | 18.1904 | 1.28929E-07 | 1.52E-05    |
| guaiacol | LA4000 | 0.5301  | 0.385517625 | 0.777725209 |
| guaiacol | LA4001 | 15.2730 | 0.000205678 | 0.006841029 |
| guaiacol | LA4002 | 1.2184  | 0.616992429 | 0.89790427  |
| guaiacol | LA4003 | 1.1691  | 0.741593439 | 0.931176005 |
| guaiacol | LA4004 | 4.7573  | 0.000467091 | 0.013234245 |
| guaiacol | LA4005 | 0.9737  | 0.957026123 | 0.984553949 |
| guaiacol | LA4006 | 5.7753  | 2.18916E-05 | 0.000999825 |
| guaiacol | LA4007 | 2.2637  | 0.113326437 | 0.466100668 |



|          |        |        |             |             |
|----------|--------|--------|-------------|-------------|
| guaiacol | LA4008 | 3.9776 | 0.001288241 | 0.026635253 |
| guaiacol | LA4009 | 3.0608 | 0.029318123 | 0.216177003 |
| guaiacol | LA4010 | 1.3085 | 0.58634632  | 0.885160207 |
| hexanal  | LA1777 | 0.4075 | 0.062084048 | 0.338827336 |
| hexanal  | LA3913 | 0.4959 | 0.021378407 | 0.176805204 |
| hexanal  | LA3914 | 0.6805 | 0.378504543 | 0.772149268 |
| hexanal  | LA3915 | 0.9601 | 0.909614066 | 0.973773422 |
| hexanal  | LA3916 | 0.2912 | 0.004863849 | 0.064992917 |
| hexanal  | LA3917 | 0.2022 | 0.000940736 | 0.021323349 |
| hexanal  | LA3918 | 0.7838 | 0.354352325 | 0.762755031 |
| hexanal  | LA3919 | 0.3200 | 0.009349033 | 0.106746422 |
| hexanal  | LA3920 | 0.2740 | 0.00737955  | 0.0885546   |
| hexanal  | LA3921 | 0.7166 | 0.208333367 | 0.618516411 |
| hexanal  | LA3922 | 0.5628 | 0.108460557 | 0.449528061 |
| hexanal  | LA3923 | 0.4403 | 0.136513599 | 0.511925996 |
| hexanal  | LA3924 | 0.6444 | 0.162858142 | 0.550658469 |
| hexanal  | LA3925 | 0.8246 | 0.610958516 | 0.8969108   |
| hexanal  | LA3926 | 0.8222 | 0.582583882 | 0.883886192 |
| hexanal  | LA3927 | 0.4540 | 0.020330888 | 0.171801272 |
| hexanal  | LA3929 | 0.5825 | 0.262636354 | 0.681073935 |
| hexanal  | LA3930 | 1.1032 | 0.838619749 | 0.962195887 |
| hexanal  | LA3931 | 0.8083 | 0.411862411 | 0.795153777 |
| hexanal  | LA3932 | 0.3507 | 0.00228202  | 0.040132076 |
| hexanal  | LA3933 | 0.6524 | 0.436524514 | 0.8142009   |
| hexanal  | LA3934 | 0.9886 | 0.970032802 | 0.9880354   |
| hexanal  | LA3935 | 1.4805 | 0.10234037  | 0.435828549 |
| hexanal  | LA3936 | 0.4883 | 0.058665187 | 0.328782916 |
| hexanal  | LA3937 | 1.1589 | 0.587927681 | 0.885653473 |
| hexanal  | LA3938 | 1.7468 | 0.015755235 | 0.144344369 |
| hexanal  | LA3939 | 1.0444 | 0.882952905 | 0.970586028 |
| hexanal  | LA3940 | 1.5765 | 0.261611544 | 0.681073935 |
| hexanal  | LA3941 | 0.6846 | 0.432105766 | 0.813917408 |
| hexanal  | LA3942 | 0.2000 | 3.28437E-07 | 3.14E-05    |
| hexanal  | LA3943 | 0.9558 | 0.85738139  | 0.968539929 |
| hexanal  | LA3944 | 0.3654 | 0.002104562 | 0.037660583 |
| hexanal  | LA3945 | 1.0060 | 0.987341543 | 0.994491482 |
| hexanal  | LA3946 | 0.4971 | 0.026690096 | 0.204179234 |
| hexanal  | LA3947 | 0.8587 | 0.727442857 | 0.925946399 |
| hexanal  | LA3948 | 0.8644 | 0.739049465 | 0.931176005 |
| hexanal  | LA3949 | 0.6542 | 0.164322327 | 0.55317961  |
| hexanal  | LA3950 | 0.9668 | 0.951011114 | 0.982875948 |
| hexanal  | LA3952 | 0.8488 | 0.616106107 | 0.89790427  |
| hexanal  | LA3953 | 0.9261 | 0.779760573 | 0.945579457 |
| hexanal  | LA3954 | 0.9693 | 0.934145509 | 0.979385922 |
| hexanal  | LA3955 | 0.9983 | 0.994553579 | 0.998201701 |
| hexanal  | LA3956 | 0.6247 | 0.042891345 | 0.268835336 |
| hexanal  | LA3957 | 0.7044 | 0.422754192 | 0.805998646 |
| hexanal  | LA3958 | 1.0392 | 0.881486708 | 0.970384791 |
| hexanal  | LA3959 | 1.1909 | 0.664423327 | 0.910087458 |
| hexanal  | LA3960 | 0.9080 | 0.860440495 | 0.968539929 |
| hexanal  | LA3961 | 1.5622 | 0.214154452 | 0.627848924 |
| hexanal  | LA3962 | 0.9425 | 0.837561018 | 0.96155125  |
| hexanal  | LA3963 | 1.0584 | 0.86118192  | 0.968539929 |
| hexanal  | LA3964 | 1.4395 | 0.175579181 | 0.571095608 |
| hexanal  | LA3965 | 1.7538 | 0.040315374 | 0.259296364 |
| hexanal  | LA3966 | 1.6677 | 0.28921187  | 0.711252852 |
| hexanal  | LA3967 | 1.0466 | 0.863789011 | 0.968539929 |
| hexanal  | LA3968 | 0.8505 | 0.512157281 | 0.850963952 |
| hexanal  | LA3969 | 0.4737 | 0.011068332 | 0.115990055 |
| hexanal  | LA3970 | 1.0242 | 0.971280461 | 0.9880354   |
| hexanal  | LA3971 | 1.6239 | 0.465313185 | 0.831185588 |
| hexanal  | LA3976 | 0.9643 | 0.947312134 | 0.982875948 |

|               |        |        |             |             |
|---------------|--------|--------|-------------|-------------|
| hexanal       | LA3977 | 1.0610 | 0.914313979 | 0.973773422 |
| hexanal       | LA3978 | 0.5186 | 0.082503365 | 0.387803835 |
| hexanal       | LA3979 | 0.6430 | 0.632807221 | 0.899415917 |
| hexanal       | LA3980 | 1.3061 | 0.29729896  | 0.720867526 |
| hexanal       | LA3981 | 1.4145 | 0.473608544 | 0.835017119 |
| hexanal       | LA3983 | 1.4834 | 0.367618006 | 0.762827222 |
| hexanal       | LA3984 | 1.4165 | 0.600048337 | 0.890833176 |
| hexanal       | LA3985 | 1.2954 | 0.779787391 | 0.945579457 |
| hexanal       | LA3986 | 0.5897 | 0.191599277 | 0.598258967 |
| hexanal       | LA3988 | 1.1312 | 0.70381693  | 0.920769477 |
| hexanal       | LA3989 | 1.1088 | 0.876439063 | 0.970384791 |
| hexanal       | LA3990 | 0.8390 | 0.664948619 | 0.910399452 |
| hexanal       | LA3992 | 0.8514 | 0.861879592 | 0.968539929 |
| hexanal       | LA3993 | 0.8228 | 0.768451854 | 0.94243751  |
| hexanal       | LA3994 | 1.2383 | 0.747499426 | 0.931898617 |
| hexanal       | LA3995 | 0.2987 | 2.3929E-05  | 0.001061199 |
| hexanal       | LA3996 | 1.1930 | 0.513359299 | 0.850963952 |
| hexanal       | LA3997 | 1.0485 | 0.943167862 | 0.98245006  |
| hexanal       | LA3998 | 0.9494 | 0.874926666 | 0.970384791 |
| hexanal       | LA3999 | 0.3210 | 0.001607184 | 0.030546479 |
| hexanal       | LA4000 | 1.2503 | 0.64317535  | 0.903634789 |
| hexanal       | LA4001 | 0.5274 | 0.184859604 | 0.584974548 |
| hexanal       | LA4002 | 1.0681 | 0.800220655 | 0.951883236 |
| hexanal       | LA4003 | 0.5587 | 0.062801696 | 0.340732606 |
| hexanal       | LA4004 | 0.5841 | 0.066625236 | 0.351470075 |
| hexanal       | LA4005 | 0.5275 | 0.050071132 | 0.296063512 |
| hexanal       | LA4006 | 1.0491 | 0.859540783 | 0.968539929 |
| hexanal       | LA4007 | 0.8820 | 0.711824042 | 0.923910251 |
| hexanal       | LA4008 | 1.7494 | 0.047586456 | 0.285518736 |
| hexanal       | LA4009 | 0.7885 | 0.482146135 | 0.839381895 |
| hexanal       | LA4010 | 0.6489 | 0.184668747 | 0.584974548 |
| hexyl alcohol | LA1777 | 0.5710 | 0.316234168 | 0.734494298 |
| hexyl alcohol | LA3913 | 0.9581 | 0.906948881 | 0.973435137 |
| hexyl alcohol | LA3914 | 0.7764 | 0.618502704 | 0.898077541 |
| hexyl alcohol | LA3915 | 1.4683 | 0.357942179 | 0.762755031 |
| hexyl alcohol | LA3916 | 0.3582 | 0.043686062 | 0.272259368 |
| hexyl alcohol | LA3917 | 0.1835 | 0.002548279 | 0.0419233   |
| hexyl alcohol | LA3918 | 1.1250 | 0.7002094   | 0.919304287 |
| hexyl alcohol | LA3919 | 0.5665 | 0.264323676 | 0.682557341 |
| hexyl alcohol | LA3920 | 0.3657 | 0.073144007 | 0.363711069 |
| hexyl alcohol | LA3921 | 0.7657 | 0.385959491 | 0.777725209 |
| hexyl alcohol | LA3922 | 0.3651 | 0.0156748   | 0.144038703 |
| hexyl alcohol | LA3923 | 0.2165 | 0.017055285 | 0.153413468 |
| hexyl alcohol | LA3924 | 1.7694 | 0.119230788 | 0.478173278 |
| hexyl alcohol | LA3925 | 1.5685 | 0.307546549 | 0.729529023 |
| hexyl alcohol | LA3926 | 0.8050 | 0.600590612 | 0.890833176 |
| hexyl alcohol | LA3927 | 0.6595 | 0.292378745 | 0.712891601 |
| hexyl alcohol | LA3929 | 1.3776 | 0.567955541 | 0.87990471  |
| hexyl alcohol | LA3930 | 0.9871 | 0.981595063 | 0.992624221 |
| hexyl alcohol | LA3931 | 0.7421 | 0.322825971 | 0.738428286 |
| hexyl alcohol | LA3932 | 0.3269 | 0.005104271 | 0.067615018 |
| hexyl alcohol | LA3933 | 0.7028 | 0.58060749  | 0.883886192 |
| hexyl alcohol | LA3934 | 1.1327 | 0.724686819 | 0.925600427 |
| hexyl alcohol | LA3935 | 1.3183 | 0.322270795 | 0.738428286 |
| hexyl alcohol | LA3936 | 0.7403 | 0.494861357 | 0.843607662 |
| hexyl alcohol | LA3937 | 0.4577 | 0.013748757 | 0.135438542 |
| hexyl alcohol | LA3938 | 1.5474 | 0.103851889 | 0.437722838 |
| hexyl alcohol | LA3939 | 1.2965 | 0.449627832 | 0.821803266 |
| hexyl alcohol | LA3940 | 1.0712 | 0.88400225  | 0.970586028 |
| hexyl alcohol | LA3941 | 0.7825 | 0.661978494 | 0.90958877  |
| hexyl alcohol | LA3942 | 1.9071 | 0.076029824 | 0.367755808 |
| hexyl alcohol | LA3943 | 1.5979 | 0.109674909 | 0.452298142 |

|                  |        |        |             |             |
|------------------|--------|--------|-------------|-------------|
| hexyl alcohol    | LA3944 | 0.9398 | 0.870036063 | 0.970339004 |
| hexyl alcohol    | LA3945 | 1.1774 | 0.709770062 | 0.923602575 |
| hexyl alcohol    | LA3946 | 0.6897 | 0.310686308 | 0.732434594 |
| hexyl alcohol    | LA3947 | 1.0481 | 0.926411001 | 0.978377595 |
| hexyl alcohol    | LA3948 | 1.9396 | 0.193208276 | 0.601441836 |
| hexyl alcohol    | LA3949 | 1.0294 | 0.934897477 | 0.979385922 |
| hexyl alcohol    | LA3950 | 1.7857 | 0.36389555  | 0.762755031 |
| hexyl alcohol    | LA3952 | 1.4160 | 0.360501927 | 0.762755031 |
| hexyl alcohol    | LA3953 | 1.4299 | 0.26317066  | 0.681881642 |
| hexyl alcohol    | LA3954 | 1.6510 | 0.253263275 | 0.67390054  |
| hexyl alcohol    | LA3955 | 1.0104 | 0.971129366 | 0.9880354   |
| hexyl alcohol    | LA3956 | 0.8734 | 0.616002722 | 0.89790427  |
| hexyl alcohol    | LA3957 | 0.6887 | 0.463248913 | 0.82970914  |
| hexyl alcohol    | LA3958 | 1.0158 | 0.958180717 | 0.984553949 |
| hexyl alcohol    | LA3959 | 1.1918 | 0.707992171 | 0.922681449 |
| hexyl alcohol    | LA3960 | 1.5036 | 0.522919031 | 0.856143518 |
| hexyl alcohol    | LA3961 | 0.7943 | 0.581254358 | 0.883886192 |
| hexyl alcohol    | LA3962 | 1.2169 | 0.558853379 | 0.877064179 |
| hexyl alcohol    | LA3963 | 1.6605 | 0.179155218 | 0.577068386 |
| hexyl alcohol    | LA3964 | 1.6303 | 0.118244665 | 0.476518625 |
| hexyl alcohol    | LA3965 | 2.3132 | 0.008557037 | 0.09942902  |
| hexyl alcohol    | LA3966 | 1.0272 | 0.961877372 | 0.984553949 |
| hexyl alcohol    | LA3967 | 0.8800 | 0.679135879 | 0.914681245 |
| hexyl alcohol    | LA3968 | 1.0649 | 0.826726655 | 0.960073694 |
| hexyl alcohol    | LA3969 | 0.4727 | 0.02839963  | 0.211958214 |
| hexyl alcohol    | LA3970 | 1.5149 | 0.59072231  | 0.887088479 |
| hexyl alcohol    | LA3971 | 1.2640 | 0.761624195 | 0.938912768 |
| hexyl alcohol    | LA3976 | 1.0848 | 0.898837513 | 0.973435137 |
| hexyl alcohol    | LA3977 | 1.5578 | 0.488826258 | 0.841212822 |
| hexyl alcohol    | LA3978 | 0.9566 | 0.9195371   | 0.975991511 |
| hexyl alcohol    | LA3979 | 0.9050 | 0.926044743 | 0.978377595 |
| hexyl alcohol    | LA3980 | 1.5246 | 0.157218156 | 0.541765267 |
| hexyl alcohol    | LA3981 | 2.0548 | 0.200948029 | 0.610626583 |
| hexyl alcohol    | LA3983 | 1.2276 | 0.687097237 | 0.91782784  |
| hexyl alcohol    | LA3984 | 2.0322 | 0.358635276 | 0.762755031 |
| hexyl alcohol    | LA3985 | 3.7798 | 0.217047196 | 0.632537543 |
| hexyl alcohol    | LA3986 | 0.5370 | 0.186350349 | 0.587795885 |
| hexyl alcohol    | LA3988 | 1.4228 | 0.350054189 | 0.761980418 |
| hexyl alcohol    | LA3989 | 1.6240 | 0.530145913 | 0.861522302 |
| hexyl alcohol    | LA3990 | 0.6413 | 0.346134951 | 0.757634442 |
| hexyl alcohol    | LA3992 | 1.5406 | 0.68777741  | 0.91782784  |
| hexyl alcohol    | LA3993 | 1.2939 | 0.738205804 | 0.93112521  |
| hexyl alcohol    | LA3994 | 2.0739 | 0.345044632 | 0.756164639 |
| hexyl alcohol    | LA3995 | 0.5175 | 0.04672052  | 0.283522224 |
| hexyl alcohol    | LA3996 | 1.9546 | 0.033046703 | 0.232466462 |
| hexyl alcohol    | LA3997 | 1.3140 | 0.72366816  | 0.925212938 |
| hexyl alcohol    | LA3998 | 1.3320 | 0.454952165 | 0.825713894 |
| hexyl alcohol    | LA3999 | 0.3545 | 0.013223307 | 0.131802343 |
| hexyl alcohol    | LA4000 | 0.9478 | 0.923806414 | 0.977873226 |
| hexyl alcohol    | LA4001 | 0.5368 | 0.267480288 | 0.687144725 |
| hexyl alcohol    | LA4002 | 0.9086 | 0.751742916 | 0.933576836 |
| hexyl alcohol    | LA4003 | 0.6759 | 0.281406668 | 0.702369008 |
| hexyl alcohol    | LA4004 | 0.5380 | 0.069039753 | 0.356649926 |
| hexyl alcohol    | LA4005 | 0.9888 | 0.976287789 | 0.991188001 |
| hexyl alcohol    | LA4006 | 1.1410 | 0.675453749 | 0.914552421 |
| hexyl alcohol    | LA4007 | 1.1906 | 0.659139067 | 0.90958877  |
| hexyl alcohol    | LA4008 | 1.2867 | 0.442198395 | 0.816778568 |
| hexyl alcohol    | LA4009 | 1.4812 | 0.31787098  | 0.735597447 |
| hexyl alcohol    | LA4010 | 0.9895 | 0.977781267 | 0.991290259 |
| isobutyl acetate | LA1777 | 3.4479 | 0.020830329 | 0.17415521  |
| isobutyl acetate | LA3913 | 5.7194 | 3.25158E-07 | 3.14E-05    |
| isobutyl acetate | LA3914 | 6.9123 | 7.59472E-05 | 0.002869116 |

|                  |        |         |             |             |
|------------------|--------|---------|-------------|-------------|
| isobutyl acetate | LA3915 | 11.3081 | 1.95496E-09 | 3.99E-07    |
| isobutyl acetate | LA3916 | 11.5482 | 5.96549E-07 | 5.22E-05    |
| isobutyl acetate | LA3917 | 0.5316  | 0.238523301 | 0.658182179 |
| isobutyl acetate | LA3918 | 1.3918  | 0.258709724 | 0.678364829 |
| isobutyl acetate | LA3919 | 0.5446  | 0.212047534 | 0.62390909  |
| isobutyl acetate | LA3920 | 0.6347  | 0.396756558 | 0.784793192 |
| isobutyl acetate | LA3921 | 0.6174  | 0.101827445 | 0.435184332 |
| isobutyl acetate | LA3922 | 1.0213  | 0.957762732 | 0.984553949 |
| isobutyl acetate | LA3923 | 1.3230  | 0.64765245  | 0.905529102 |
| isobutyl acetate | LA3924 | 2.6431  | 0.005607863 | 0.072712122 |
| isobutyl acetate | LA3925 | 0.9656  | 0.933821485 | 0.979385922 |
| isobutyl acetate | LA3926 | 0.7790  | 0.528590785 | 0.860823737 |
| isobutyl acetate | LA3927 | 0.8725  | 0.718275239 | 0.925212938 |
| isobutyl acetate | LA3929 | 3.9429  | 0.010711708 | 0.113811898 |
| isobutyl acetate | LA3930 | 0.8319  | 0.731546749 | 0.928466633 |
| isobutyl acetate | LA3931 | 1.0806  | 0.788222164 | 0.947232543 |
| isobutyl acetate | LA3932 | 0.4501  | 0.036384364 | 0.245233819 |
| isobutyl acetate | LA3933 | 1.2818  | 0.684319952 | 0.91782784  |
| isobutyl acetate | LA3934 | 0.6709  | 0.238347866 | 0.658182179 |
| isobutyl acetate | LA3935 | 0.4600  | 0.003725275 | 0.054025315 |
| isobutyl acetate | LA3936 | 1.0382  | 0.929109439 | 0.979385922 |
| isobutyl acetate | LA3937 | 0.7184  | 0.274908468 | 0.695223068 |
| isobutyl acetate | LA3938 | 3.1496  | 8.8157E-06  | 0.000508982 |
| isobutyl acetate | LA3939 | 0.6109  | 0.133794683 | 0.508090904 |
| isobutyl acetate | LA3940 | 0.2314  | 0.001217406 | 0.025869878 |
| isobutyl acetate | LA3941 | 1.2871  | 0.638048343 | 0.900427508 |
| isobutyl acetate | LA3942 | 1.1799  | 0.634170058 | 0.899415917 |
| isobutyl acetate | LA3943 | 0.7002  | 0.203391405 | 0.612357114 |
| isobutyl acetate | LA3944 | 0.4186  | 0.021835443 | 0.178653625 |
| isobutyl acetate | LA3945 | 1.0923  | 0.833502584 | 0.96155125  |
| isobutyl acetate | LA3946 | 1.4111  | 0.325826323 | 0.740734434 |
| isobutyl acetate | LA3947 | 0.2166  | 0.001709594 | 0.031705198 |
| isobutyl acetate | LA3948 | 0.6977  | 0.459683386 | 0.826457792 |
| isobutyl acetate | LA3949 | 1.1578  | 0.665830272 | 0.91093787  |
| isobutyl acetate | LA3950 | 0.5828  | 0.37670411  | 0.771332229 |
| isobutyl acetate | LA3952 | 1.0637  | 0.865138419 | 0.968539929 |
| isobutyl acetate | LA3953 | 1.1556  | 0.636011197 | 0.900427508 |
| isobutyl acetate | LA3954 | 0.5334  | 0.134475365 | 0.508254208 |
| isobutyl acetate | LA3955 | 0.9934  | 0.980725365 | 0.992624221 |
| isobutyl acetate | LA3956 | 0.7952  | 0.374939289 | 0.770009547 |
| isobutyl acetate | LA3957 | 0.5526  | 0.222674014 | 0.636912798 |
| isobutyl acetate | LA3958 | 0.9144  | 0.755051716 | 0.935627839 |
| isobutyl acetate | LA3959 | 0.5740  | 0.215531565 | 0.630522552 |
| isobutyl acetate | LA3960 | 0.7231  | 0.660807562 | 0.90958877  |
| isobutyl acetate | LA3961 | 1.0765  | 0.853590111 | 0.968539929 |
| isobutyl acetate | LA3962 | 1.7786  | 0.073281584 | 0.363711069 |
| isobutyl acetate | LA3963 | 1.1321  | 0.730904117 | 0.928062181 |
| isobutyl acetate | LA3964 | 0.7035  | 0.239746812 | 0.660328753 |
| isobutyl acetate | LA3965 | 1.9451  | 0.029085295 | 0.215498796 |
| isobutyl acetate | LA3966 | 1.3351  | 0.590204171 | 0.887088479 |
| isobutyl acetate | LA3967 | 0.8239  | 0.512507135 | 0.850963952 |
| isobutyl acetate | LA3968 | 0.8732  | 0.621659977 | 0.898077541 |
| isobutyl acetate | LA3969 | 0.7908  | 0.472217415 | 0.834287119 |
| isobutyl acetate | LA3970 | 6.0711  | 0.01480899  | 0.13968405  |
| isobutyl acetate | LA3971 | 1.8753  | 0.394752608 | 0.783022521 |
| isobutyl acetate | LA3976 | 0.2110  | 0.011226873 | 0.117249936 |
| isobutyl acetate | LA3977 | 4.8432  | 0.010155405 | 0.110480627 |
| isobutyl acetate | LA3978 | 1.5903  | 0.269899137 | 0.689488431 |
| isobutyl acetate | LA3979 | 1.6763  | 0.615415678 | 0.89790427  |
| isobutyl acetate | LA3980 | 1.5799  | 0.1087851   | 0.449528061 |
| isobutyl acetate | LA3981 | 0.5235  | 0.229522655 | 0.646943008 |
| isobutyl acetate | LA3983 | 1.0829  | 0.870058434 | 0.970339004 |

|                  |        |         |             |             |
|------------------|--------|---------|-------------|-------------|
| isobutyl acetate | LA3984 | 0.9413  | 0.934719618 | 0.979385922 |
| isobutyl acetate | LA3985 | 0.3548  | 0.314492366 | 0.732830713 |
| isobutyl acetate | LA3986 | 0.3435  | 0.028201348 | 0.211571595 |
| isobutyl acetate | LA3988 | 1.9300  | 0.068735056 | 0.356007587 |
| isobutyl acetate | LA3989 | 2.0349  | 0.336284649 | 0.749586368 |
| isobutyl acetate | LA3990 | 0.8860  | 0.788447259 | 0.947232543 |
| isobutyl acetate | LA3992 | 23.2894 | 0.002277673 | 0.040132076 |
| isobutyl acetate | LA3993 | 0.8309  | 0.801553274 | 0.952293751 |
| isobutyl acetate | LA3994 | 1.3903  | 0.655528099 | 0.909027475 |
| isobutyl acetate | LA3995 | 4.4242  | 3.05081E-06 | 0.000207455 |
| isobutyl acetate | LA3996 | 0.6512  | 0.15338454  | 0.538253088 |
| isobutyl acetate | LA3997 | 1.9291  | 0.373847968 | 0.768800257 |
| isobutyl acetate | LA3998 | 25.7187 | 5.74147E-18 | 1.76E-14    |
| isobutyl acetate | LA3999 | 11.2582 | 2.08786E-09 | 3.99E-07    |
| isobutyl acetate | LA4000 | 0.7771  | 0.638359937 | 0.900427508 |
| isobutyl acetate | LA4001 | 25.8926 | 2.02456E-09 | 3.99E-07    |
| isobutyl acetate | LA4002 | 1.9101  | 0.025783332 | 0.200755715 |
| isobutyl acetate | LA4003 | 0.5553  | 0.090986062 | 0.410544131 |
| isobutyl acetate | LA4004 | 0.9430  | 0.857059196 | 0.968539929 |
| isobutyl acetate | LA4005 | 0.6507  | 0.236442989 | 0.657350152 |
| isobutyl acetate | LA4006 | 0.8233  | 0.518971644 | 0.854488751 |
| isobutyl acetate | LA4007 | 1.0959  | 0.808727906 | 0.953768655 |
| isobutyl acetate | LA4008 | 1.4717  | 0.218278849 | 0.634314604 |
| isobutyl acetate | LA4009 | 0.6727  | 0.291910399 | 0.712336922 |
| isobutyl acetate | LA4010 | 1.1042  | 0.784624502 | 0.946467831 |
| isovaleraldehyde | LA1777 | 1.0445  | 0.924505635 | 0.977873226 |
| isovaleraldehyde | LA3913 | 0.5335  | 0.031015034 | 0.222889167 |
| isovaleraldehyde | LA3914 | 0.8195  | 0.633709857 | 0.899415917 |
| isovaleraldehyde | LA3915 | 0.7600  | 0.424240347 | 0.806821294 |
| isovaleraldehyde | LA3916 | 1.2400  | 0.606649671 | 0.894095025 |
| isovaleraldehyde | LA3917 | 0.2998  | 0.009036863 | 0.103957898 |
| isovaleraldehyde | LA3918 | 1.0437  | 0.864914155 | 0.968539929 |
| isovaleraldehyde | LA3919 | 0.6809  | 0.358221456 | 0.762755031 |
| isovaleraldehyde | LA3920 | 0.5379  | 0.178755123 | 0.576386382 |
| isovaleraldehyde | LA3921 | 0.8719  | 0.588120215 | 0.885653473 |
| isovaleraldehyde | LA3922 | 0.7356  | 0.369608593 | 0.764518643 |
| isovaleraldehyde | LA3923 | 0.7526  | 0.589218323 | 0.886776642 |
| isovaleraldehyde | LA3924 | 0.7590  | 0.359393336 | 0.762755031 |
| isovaleraldehyde | LA3925 | 0.6652  | 0.260932915 | 0.680742034 |
| isovaleraldehyde | LA3926 | 1.1456  | 0.689826383 | 0.918070679 |
| isovaleraldehyde | LA3927 | 1.2948  | 0.426539533 | 0.807680056 |
| isovaleraldehyde | LA3929 | 0.3883  | 0.040422703 | 0.259315453 |
| isovaleraldehyde | LA3930 | 1.2547  | 0.622572692 | 0.898077541 |
| isovaleraldehyde | LA3931 | 1.3798  | 0.194296164 | 0.602988095 |
| isovaleraldehyde | LA3932 | 0.2792  | 0.000104882 | 0.00376807  |
| isovaleraldehyde | LA3933 | 0.3390  | 0.03951898  | 0.257293785 |
| isovaleraldehyde | LA3934 | 1.1678  | 0.593652996 | 0.888328227 |
| isovaleraldehyde | LA3935 | 1.8054  | 0.010181548 | 0.110480627 |
| isovaleraldehyde | LA3936 | 0.8128  | 0.566951987 | 0.87990471  |
| isovaleraldehyde | LA3937 | 2.0672  | 0.005366584 | 0.070479601 |
| isovaleraldehyde | LA3938 | 2.2588  | 0.000232664 | 0.007573956 |
| isovaleraldehyde | LA3939 | 1.0306  | 0.914901499 | 0.973773422 |
| isovaleraldehyde | LA3940 | 1.0519  | 0.896042356 | 0.973435137 |
| isovaleraldehyde | LA3941 | 0.6238  | 0.306083262 | 0.729376193 |
| isovaleraldehyde | LA3942 | 1.0140  | 0.963004867 | 0.984553949 |
| isovaleraldehyde | LA3943 | 0.5995  | 0.033743706 | 0.235206698 |
| isovaleraldehyde | LA3944 | 1.0599  | 0.852216735 | 0.968539929 |
| isovaleraldehyde | LA3945 | 1.3548  | 0.399999639 | 0.78816956  |
| isovaleraldehyde | LA3946 | 0.4189  | 0.003950036 | 0.056219117 |
| isovaleraldehyde | LA3947 | 1.0919  | 0.833276339 | 0.96155125  |
| isovaleraldehyde | LA3948 | 0.8652  | 0.729124241 | 0.926929862 |
| isovaleraldehyde | LA3949 | 0.8387  | 0.546314853 | 0.871143017 |



|                  |        |        |             |             |
|------------------|--------|--------|-------------|-------------|
| isovaleraldehyde | LA3950 | 0.1648 | 0.000617826 | 0.016421833 |
| isovaleraldehyde | LA3952 | 0.9978 | 0.994295476 | 0.998201701 |
| isovaleraldehyde | LA3953 | 1.3682 | 0.23272675  | 0.651485583 |
| isovaleraldehyde | LA3954 | 1.2592 | 0.522775699 | 0.856143518 |
| isovaleraldehyde | LA3955 | 0.8963 | 0.639889282 | 0.901501475 |
| isovaleraldehyde | LA3956 | 0.5910 | 0.017953721 | 0.15832388  |
| isovaleraldehyde | LA3957 | 1.4262 | 0.395525322 | 0.783022521 |
| isovaleraldehyde | LA3958 | 1.5235 | 0.087835787 | 0.402643605 |
| isovaleraldehyde | LA3959 | 1.4569 | 0.328428333 | 0.742514275 |
| isovaleraldehyde | LA3960 | 0.6166 | 0.356960549 | 0.762755031 |
| isovaleraldehyde | LA3961 | 2.5817 | 0.00583085  | 0.074654397 |
| isovaleraldehyde | LA3962 | 1.0391 | 0.889360245 | 0.972213686 |
| isovaleraldehyde | LA3963 | 1.0277 | 0.929895986 | 0.979385922 |
| isovaleraldehyde | LA3964 | 1.1503 | 0.585888758 | 0.885160207 |
| isovaleraldehyde | LA3965 | 1.6786 | 0.047962999 | 0.287214828 |
| isovaleraldehyde | LA3966 | 3.4683 | 0.007131372 | 0.086595231 |
| isovaleraldehyde | LA3967 | 1.5429 | 0.088119367 | 0.402643605 |
| isovaleraldehyde | LA3968 | 0.9667 | 0.885982558 | 0.970981353 |
| isovaleraldehyde | LA3969 | 2.4092 | 0.001780994 | 0.032657181 |
| isovaleraldehyde | LA3970 | 0.6600 | 0.512806696 | 0.850963952 |
| isovaleraldehyde | LA3971 | 2.7732 | 0.108348178 | 0.449528061 |
| isovaleraldehyde | LA3976 | 0.5479 | 0.253090756 | 0.67390054  |
| isovaleraldehyde | LA3977 | 0.5488 | 0.254477241 | 0.674879282 |
| isovaleraldehyde | LA3978 | 1.0181 | 0.960407362 | 0.984553949 |
| isovaleraldehyde | LA3979 | 1.7899 | 0.510023428 | 0.850963952 |
| isovaleraldehyde | LA3980 | 2.3125 | 0.000647942 | 0.016946175 |
| isovaleraldehyde | LA3981 | 0.6334 | 0.323727184 | 0.739106084 |
| isovaleraldehyde | LA3983 | 1.2084 | 0.650973845 | 0.907895049 |
| isovaleraldehyde | LA3984 | 0.7689 | 0.678899463 | 0.914681245 |
| isovaleraldehyde | LA3985 | 0.1972 | 0.06684308  | 0.351470075 |
| isovaleraldehyde | LA3986 | 0.3224 | 0.006868802 | 0.084411784 |
| isovaleraldehyde | LA3988 | 1.4073 | 0.270730177 | 0.689488431 |
| isovaleraldehyde | LA3989 | 0.9978 | 0.997213545 | 0.999168573 |
| isovaleraldehyde | LA3990 | 1.1862 | 0.659420032 | 0.90958877  |
| isovaleraldehyde | LA3992 | 0.2187 | 0.085774656 | 0.397682496 |
| isovaleraldehyde | LA3993 | 0.3546 | 0.101994135 | 0.435288777 |
| isovaleraldehyde | LA3994 | 1.3368 | 0.647444184 | 0.905529102 |
| isovaleraldehyde | LA3995 | 0.6924 | 0.176664028 | 0.573316966 |
| isovaleraldehyde | LA3996 | 0.4705 | 0.003572432 | 0.053325083 |
| isovaleraldehyde | LA3997 | 1.4506 | 0.557890182 | 0.877064179 |
| isovaleraldehyde | LA3998 | 1.3681 | 0.320356193 | 0.737202017 |
| isovaleraldehyde | LA3999 | 0.8278 | 0.582086191 | 0.883886192 |
| isovaleraldehyde | LA4000 | 0.8916 | 0.803406417 | 0.952293751 |
| isovaleraldehyde | LA4001 | 0.2644 | 0.00400539  | 0.056481536 |
| isovaleraldehyde | LA4002 | 1.7517 | 0.024619667 | 0.194162782 |
| isovaleraldehyde | LA4003 | 0.8154 | 0.494593508 | 0.843607662 |
| isovaleraldehyde | LA4004 | 0.6260 | 0.094577512 | 0.417116109 |
| isovaleraldehyde | LA4005 | 0.9986 | 0.996479703 | 0.998764458 |
| isovaleraldehyde | LA4006 | 1.0181 | 0.944835718 | 0.98245006  |
| isovaleraldehyde | LA4007 | 2.6988 | 0.002325018 | 0.0406546   |
| isovaleraldehyde | LA4008 | 2.5364 | 0.000582276 | 0.015908612 |
| isovaleraldehyde | LA4009 | 0.7196 | 0.308768971 | 0.731294931 |
| isovaleraldehyde | LA4010 | 1.0209 | 0.946957109 | 0.982875948 |
| isovaleronitrile | LA1777 | 0.1060 | 4.23236E-05 | 0.001726803 |
| isovaleronitrile | LA3913 | 0.4383 | 0.017096076 | 0.153413468 |
| isovaleronitrile | LA3914 | 2.8591 | 0.034377337 | 0.237996948 |
| isovaleronitrile | LA3915 | 0.9278 | 0.854055739 | 0.968539929 |
| isovaleronitrile | LA3916 | 1.6638 | 0.304708892 | 0.727876042 |
| isovaleronitrile | LA3917 | 0.1168 | 9.23892E-05 | 0.003406156 |
| isovaleronitrile | LA3918 | 1.0974 | 0.755416873 | 0.935627839 |
| isovaleronitrile | LA3919 | 0.6825 | 0.441733391 | 0.816739684 |
| isovaleronitrile | LA3920 | 0.6015 | 0.352944114 | 0.762755031 |

|                  |        |        |             |             |
|------------------|--------|--------|-------------|-------------|
| isovaleronitrile | LA3921 | 0.7119 | 0.258135749 | 0.678021796 |
| isovaleronitrile | LA3922 | 0.5713 | 0.16822489  | 0.55831688  |
| isovaleronitrile | LA3923 | 1.1787 | 0.792352604 | 0.947951453 |
| isovaleronitrile | LA3924 | 2.4251 | 0.013267367 | 0.131812153 |
| isovaleronitrile | LA3925 | 0.9670 | 0.937798882 | 0.979979304 |
| isovaleronitrile | LA3926 | 0.8817 | 0.755370409 | 0.935627839 |
| isovaleronitrile | LA3927 | 1.6587 | 0.189568493 | 0.594343841 |
| isovaleronitrile | LA3929 | 0.3191 | 0.037095028 | 0.248927162 |
| isovaleronitrile | LA3930 | 1.3279 | 0.604280083 | 0.89289183  |
| isovaleronitrile | LA3931 | 1.5691 | 0.125991501 | 0.4940636   |
| isovaleronitrile | LA3932 | 0.1411 | 5.7425E-07  | 5.17E-05    |
| isovaleronitrile | LA3933 | 0.3959 | 0.137033275 | 0.512154363 |
| isovaleronitrile | LA3934 | 2.3272 | 0.014551383 | 0.139583799 |
| isovaleronitrile | LA3935 | 1.6786 | 0.057436533 | 0.323879039 |
| isovaleronitrile | LA3936 | 0.5675 | 0.18768196  | 0.589674334 |
| isovaleronitrile | LA3937 | 1.3507 | 0.330416841 | 0.74425851  |
| isovaleronitrile | LA3938 | 3.7224 | 6.22471E-07 | 5.29E-05    |
| isovaleronitrile | LA3939 | 0.9919 | 0.980592872 | 0.992624221 |
| isovaleronitrile | LA3940 | 0.6993 | 0.436892535 | 0.8142009   |
| isovaleronitrile | LA3941 | 0.8344 | 0.740671515 | 0.931176005 |
| isovaleronitrile | LA3942 | 1.5431 | 0.221445506 | 0.634940929 |
| isovaleronitrile | LA3943 | 0.2634 | 3.48593E-06 | 0.000220545 |
| isovaleronitrile | LA3944 | 2.7618 | 0.006212939 | 0.07823701  |
| isovaleronitrile | LA3945 | 2.5933 | 0.026260867 | 0.202498798 |
| isovaleronitrile | LA3946 | 0.4965 | 0.050379227 | 0.297033593 |
| isovaleronitrile | LA3947 | 0.9884 | 0.981281646 | 0.992624221 |
| isovaleronitrile | LA3948 | 0.9700 | 0.95107702  | 0.982875948 |
| isovaleronitrile | LA3949 | 0.4420 | 0.018496038 | 0.161247511 |
| isovaleronitrile | LA3950 | 0.3330 | 0.077713033 | 0.373902329 |
| isovaleronitrile | LA3952 | 1.6388 | 0.183312384 | 0.582511884 |
| isovaleronitrile | LA3953 | 1.5265 | 0.174992628 | 0.570575098 |
| isovaleronitrile | LA3954 | 2.7918 | 0.016636446 | 0.15016969  |
| isovaleronitrile | LA3955 | 0.7229 | 0.24271696  | 0.66254585  |
| isovaleronitrile | LA3956 | 0.7663 | 0.312284535 | 0.732830713 |
| isovaleronitrile | LA3957 | 2.1241 | 0.128957776 | 0.499507335 |
| isovaleronitrile | LA3958 | 1.6145 | 0.101740897 | 0.435184332 |
| isovaleronitrile | LA3959 | 1.6203 | 0.29105204  | 0.712336922 |
| isovaleronitrile | LA3960 | 0.6274 | 0.454271406 | 0.825713894 |
| isovaleronitrile | LA3961 | 1.7547 | 0.167677234 | 0.558315926 |
| isovaleronitrile | LA3962 | 1.2827 | 0.447289637 | 0.821059562 |
| isovaleronitrile | LA3963 | 1.0332 | 0.929362894 | 0.979385922 |
| isovaleronitrile | LA3964 | 1.7371 | 0.07049344  | 0.358322137 |
| isovaleronitrile | LA3965 | 3.9653 | 1.03499E-05 | 0.000585072 |
| isovaleronitrile | LA3966 | 3.4263 | 0.024682785 | 0.194162782 |
| isovaleronitrile | LA3967 | 1.4387 | 0.227932527 | 0.645211409 |
| isovaleronitrile | LA3968 | 1.3322 | 0.306351445 | 0.729376193 |
| isovaleronitrile | LA3969 | 2.4803 | 0.00649677  | 0.08081348  |
| isovaleronitrile | LA3970 | 0.9676 | 0.965078177 | 0.985365106 |
| isovaleronitrile | LA3971 | 2.1794 | 0.301259131 | 0.724275522 |
| isovaleronitrile | LA3976 | 0.7454 | 0.638055127 | 0.900427508 |
| isovaleronitrile | LA3977 | 0.9828 | 0.977865381 | 0.991290259 |
| isovaleronitrile | LA3978 | 0.9955 | 0.991696784 | 0.997234215 |
| isovaleronitrile | LA3979 | 0.6437 | 0.674505923 | 0.914322307 |
| isovaleronitrile | LA3980 | 5.2469 | 1.64942E-08 | 2.52E-06    |
| isovaleronitrile | LA3981 | 1.7112 | 0.327997301 | 0.742514275 |
| isovaleronitrile | LA3983 | 2.1487 | 0.123714693 | 0.489737336 |
| isovaleronitrile | LA3984 | 1.7262 | 0.468730669 | 0.831487448 |
| isovaleronitrile | LA3985 | 0.8395 | 0.867730644 | 0.970339004 |
| isovaleronitrile | LA3986 | 0.7417 | 0.514823166 | 0.851884764 |
| isovaleronitrile | LA3988 | 1.1576 | 0.690933779 | 0.918070679 |
| isovaleronitrile | LA3989 | 1.1634 | 0.840768812 | 0.963216984 |
| isovaleronitrile | LA3990 | 0.9308 | 0.876167863 | 0.970384791 |

|                  |        |        |             |             |
|------------------|--------|--------|-------------|-------------|
| isovaleronitrile | LA3992 | 0.3402 | 0.30423101  | 0.727870907 |
| isovaleronitrile | LA3993 | 1.9672 | 0.368313875 | 0.763055883 |
| isovaleronitrile | LA3994 | 2.3871 | 0.248315421 | 0.669223144 |
| isovaleronitrile | LA3995 | 0.3384 | 0.000820757 | 0.020254165 |
| isovaleronitrile | LA3996 | 0.9539 | 0.87763188  | 0.970384791 |
| isovaleronitrile | LA3997 | 0.6599 | 0.581088418 | 0.883886192 |
| isovaleronitrile | LA3998 | 1.5136 | 0.268303311 | 0.687611501 |
| isovaleronitrile | LA3999 | 0.5465 | 0.138400156 | 0.514586242 |
| isovaleronitrile | LA4000 | 0.6764 | 0.475025834 | 0.835026951 |
| isovaleronitrile | LA4001 | 0.2973 | 0.026879199 | 0.204405274 |
| isovaleronitrile | LA4002 | 2.7039 | 0.000799481 | 0.020052556 |
| isovaleronitrile | LA4003 | 1.0623 | 0.864744905 | 0.968539929 |
| isovaleronitrile | LA4004 | 0.4357 | 0.012581249 | 0.127058158 |
| isovaleronitrile | LA4005 | 2.5696 | 0.01091074  | 0.115127119 |
| isovaleronitrile | LA4006 | 1.4279 | 0.246743391 | 0.669223144 |
| isovaleronitrile | LA4007 | 3.1848 | 0.002753724 | 0.04434945  |
| isovaleronitrile | LA4008 | 2.9217 | 0.000840303 | 0.020407359 |
| isovaleronitrile | LA4009 | 0.5215 | 0.089890556 | 0.408108459 |
| isovaleronitrile | LA4010 | 2.1961 | 0.033616171 | 0.235206698 |
| methional        | LA1777 | 0.7318 | 0.477086435 | 0.83597154  |
| methional        | LA3913 | 0.4183 | 0.001782271 | 0.032657181 |
| methional        | LA3914 | 1.1051 | 0.802396989 | 0.952293751 |
| methional        | LA3915 | 0.6090 | 0.131000905 | 0.504661815 |
| methional        | LA3916 | 0.8435 | 0.669894189 | 0.912906394 |
| methional        | LA3917 | 0.2588 | 0.007103839 | 0.086595231 |
| methional        | LA3918 | 0.9716 | 0.904656633 | 0.973435137 |
| methional        | LA3919 | 0.9234 | 0.842078074 | 0.963634595 |
| methional        | LA3920 | 0.8553 | 0.722780687 | 0.925212938 |
| methional        | LA3921 | 0.9790 | 0.929987453 | 0.979385922 |
| methional        | LA3922 | 1.0087 | 0.978865625 | 0.991502421 |
| methional        | LA3923 | 1.1688 | 0.756571092 | 0.936196579 |
| methional        | LA3924 | 1.3839 | 0.258650183 | 0.678364829 |
| methional        | LA3925 | 0.7495 | 0.435287697 | 0.813917408 |
| methional        | LA3926 | 0.6608 | 0.203322916 | 0.612357114 |
| methional        | LA3927 | 1.1405 | 0.672053648 | 0.913734467 |
| methional        | LA3929 | 0.3203 | 0.009943563 | 0.110243851 |
| methional        | LA3930 | 0.9822 | 0.967412316 | 0.986431752 |
| methional        | LA3931 | 1.0332 | 0.89029879  | 0.97227491  |
| methional        | LA3932 | 0.5876 | 0.089524528 | 0.407656333 |
| methional        | LA3933 | 0.6592 | 0.406068819 | 0.790942448 |
| methional        | LA3934 | 1.3186 | 0.319718888 | 0.737202017 |
| methional        | LA3935 | 1.2479 | 0.31259026  | 0.732830713 |
| methional        | LA3936 | 0.8335 | 0.598620009 | 0.890833176 |
| methional        | LA3937 | 1.6016 | 0.058519313 | 0.328567152 |
| methional        | LA3938 | 2.2941 | 8.79367E-05 | 0.00328154  |
| methional        | LA3939 | 1.4153 | 0.198208943 | 0.607126492 |
| methional        | LA3940 | 1.2525 | 0.543301733 | 0.869848917 |
| methional        | LA3941 | 0.8756 | 0.763137266 | 0.938962619 |
| methional        | LA3942 | 1.0239 | 0.934098277 | 0.979385922 |
| methional        | LA3943 | 0.8490 | 0.476640135 | 0.83584059  |
| methional        | LA3944 | 1.1969 | 0.546779788 | 0.871430287 |
| methional        | LA3945 | 3.1978 | 0.00078203  | 0.019776957 |
| methional        | LA3946 | 0.6896 | 0.196873347 | 0.607126492 |
| methional        | LA3947 | 1.0518 | 0.899344081 | 0.973435137 |
| methional        | LA3948 | 1.5656 | 0.262420997 | 0.681073935 |
| methional        | LA3949 | 1.3021 | 0.343584862 | 0.755811393 |
| methional        | LA3950 | 0.8474 | 0.741252278 | 0.931176005 |
| methional        | LA3952 | 1.1876 | 0.565134306 | 0.879608838 |
| methional        | LA3953 | 1.2276 | 0.414052276 | 0.79785892  |
| methional        | LA3954 | 1.0378 | 0.914304603 | 0.973773422 |
| methional        | LA3955 | 1.1059 | 0.652489639 | 0.907895049 |
| methional        | LA3956 | 0.7637 | 0.209389654 | 0.619791595 |

|                 |        |         |             |             |
|-----------------|--------|---------|-------------|-------------|
| methional       | LA3957 | 0.8163  | 0.611358711 | 0.8969108   |
| methional       | LA3958 | 1.2264  | 0.386321019 | 0.777725209 |
| methional       | LA3959 | 1.2178  | 0.620423087 | 0.898077541 |
| methional       | LA3960 | 0.9822  | 0.971417825 | 0.9880354   |
| methional       | LA3961 | 1.0405  | 0.903733623 | 0.973435137 |
| methional       | LA3962 | 2.2632  | 0.002681144 | 0.043408998 |
| methional       | LA3963 | 0.9418  | 0.8398013   | 0.963190397 |
| methional       | LA3964 | 1.2901  | 0.299956758 | 0.723299984 |
| methional       | LA3965 | 2.9241  | 1.9857E-05  | 0.000920643 |
| methional       | LA3966 | 2.0636  | 0.100573436 | 0.43296923  |
| methional       | LA3967 | 1.5508  | 0.071069777 | 0.358867191 |
| methional       | LA3968 | 0.9862  | 0.951012466 | 0.982875948 |
| methional       | LA3969 | 2.1563  | 0.004261822 | 0.059548746 |
| methional       | LA3970 | 0.5897  | 0.384141539 | 0.777413561 |
| methional       | LA3971 | 1.5302  | 0.483274636 | 0.839381895 |
| methional       | LA3976 | 0.9731  | 0.956798244 | 0.984553949 |
| methional       | LA3977 | 0.8707  | 0.783076869 | 0.946467831 |
| methional       | LA3978 | 0.8108  | 0.598820406 | 0.890833176 |
| methional       | LA3979 | 0.5843  | 0.524665579 | 0.857168538 |
| methional       | LA3980 | 2.9832  | 3.53161E-06 | 0.000220545 |
| methional       | LA3981 | 1.2088  | 0.668063104 | 0.91253503  |
| methional       | LA3983 | 1.3615  | 0.440407415 | 0.815452569 |
| methional       | LA3984 | 1.5031  | 0.501848661 | 0.846360081 |
| methional       | LA3985 | 1.7912  | 0.490770353 | 0.841792197 |
| methional       | LA3986 | 0.4694  | 0.040912017 | 0.261905381 |
| methional       | LA3988 | 1.6389  | 0.095854935 | 0.42143118  |
| methional       | LA3989 | 1.5342  | 0.480606394 | 0.83916228  |
| methional       | LA3990 | 0.8487  | 0.657779212 | 0.909477364 |
| methional       | LA3992 | 14.2817 | 0.00170433  | 0.031705198 |
| methional       | LA3993 | 0.9626  | 0.949771536 | 0.982875948 |
| methional       | LA3994 | 1.9987  | 0.253903903 | 0.674824353 |
| methional       | LA3995 | 0.2962  | 3.32092E-06 | 0.000216213 |
| methional       | LA3996 | 1.1227  | 0.638832719 | 0.900427508 |
| methional       | LA3997 | 0.8083  | 0.72583033  | 0.925600427 |
| methional       | LA3998 | 0.6499  | 0.153072164 | 0.538253088 |
| methional       | LA3999 | 0.3051  | 0.000315118 | 0.009447913 |
| methional       | LA4000 | 0.8805  | 0.772748892 | 0.943176305 |
| methional       | LA4001 | 0.3238  | 0.010658011 | 0.113635936 |
| methional       | LA4002 | 1.2719  | 0.312405209 | 0.732830713 |
| methional       | LA4003 | 0.7719  | 0.36471425  | 0.762755031 |
| methional       | LA4004 | 0.7666  | 0.320658786 | 0.737202017 |
| methional       | LA4005 | 1.2240  | 0.497648144 | 0.844594188 |
| methional       | LA4006 | 1.2034  | 0.454446459 | 0.825713894 |
| methional       | LA4007 | 1.8150  | 0.055339861 | 0.318159085 |
| methional       | LA4008 | 1.1957  | 0.487961552 | 0.841212822 |
| methional       | LA4009 | 0.6895  | 0.22896255  | 0.646333398 |
| methional       | LA4010 | 1.2325  | 0.50016401  | 0.845581144 |
| methyl benzoate | LA1777 | 6.0089  | 0.002532809 | 0.041906717 |
| methyl benzoate | LA3913 | 3.4914  | 0.000890958 | 0.02070964  |
| methyl benzoate | LA3914 | 3.0443  | 0.038944938 | 0.256835151 |
| methyl benzoate | LA3915 | 4.2993  | 0.001020432 | 0.022464186 |
| methyl benzoate | LA3916 | 0.4514  | 0.139870483 | 0.515924738 |
| methyl benzoate | LA3917 | 0.5561  | 0.322881388 | 0.738428286 |
| methyl benzoate | LA3918 | 0.5180  | 0.042649005 | 0.268530772 |
| methyl benzoate | LA3919 | 0.7171  | 0.537357396 | 0.868628437 |
| methyl benzoate | LA3920 | 0.4007  | 0.12393388  | 0.489971153 |
| methyl benzoate | LA3921 | 0.5313  | 0.052761176 | 0.307522283 |
| methyl benzoate | LA3922 | 0.4885  | 0.104556184 | 0.439607487 |
| methyl benzoate | LA3923 | 0.2681  | 0.052541078 | 0.306823852 |
| methyl benzoate | LA3924 | 0.7321  | 0.421209809 | 0.804558062 |
| methyl benzoate | LA3925 | 0.8604  | 0.747467443 | 0.931898617 |
| methyl benzoate | LA3926 | 0.5270  | 0.144668145 | 0.52450773  |

|                 |        |        |             |             |
|-----------------|--------|--------|-------------|-------------|
| methyl benzoate | LA3927 | 0.8099 | 0.614556474 | 0.89790427  |
| methyl benzoate | LA3929 | 4.7048 | 0.009304937 | 0.106640851 |
| methyl benzoate | LA3930 | 1.3012 | 0.657751747 | 0.909477364 |
| methyl benzoate | LA3931 | 0.6470 | 0.173133937 | 0.568444042 |
| methyl benzoate | LA3932 | 0.5950 | 0.218699579 | 0.63488194  |
| methyl benzoate | LA3933 | 0.8302 | 0.783243295 | 0.946467831 |
| methyl benzoate | LA3934 | 1.2977 | 0.486877469 | 0.841212822 |
| methyl benzoate | LA3935 | 0.9068 | 0.740782381 | 0.931176005 |
| methyl benzoate | LA3936 | 0.7460 | 0.530013477 | 0.861522302 |
| methyl benzoate | LA3937 | 0.9771 | 0.944885793 | 0.98245006  |
| methyl benzoate | LA3938 | 1.0460 | 0.87432651  | 0.970384791 |
| methyl benzoate | LA3939 | 0.9345 | 0.85223177  | 0.968539929 |
| methyl benzoate | LA3940 | 0.7764 | 0.612415481 | 0.897505446 |
| methyl benzoate | LA3941 | 1.0306 | 0.959516076 | 0.984553949 |
| methyl benzoate | LA3942 | 0.8085 | 0.580950831 | 0.883886192 |
| methyl benzoate | LA3943 | 0.7411 | 0.334076062 | 0.748369509 |
| methyl benzoate | LA3944 | 0.4414 | 0.042276171 | 0.26673213  |
| methyl benzoate | LA3945 | 1.3006 | 0.57194597  | 0.881536692 |
| methyl benzoate | LA3946 | 0.6472 | 0.262351485 | 0.681073935 |
| methyl benzoate | LA3947 | 1.9320 | 0.221531318 | 0.634940929 |
| methyl benzoate | LA3948 | 0.8075 | 0.691640306 | 0.918070679 |
| methyl benzoate | LA3949 | 0.7044 | 0.351175605 | 0.761980418 |
| methyl benzoate | LA3950 | 0.4062 | 0.183088936 | 0.582511884 |
| methyl benzoate | LA3952 | 0.8900 | 0.772467327 | 0.943176305 |
| methyl benzoate | LA3953 | 0.8487 | 0.627909516 | 0.898759707 |
| methyl benzoate | LA3954 | 1.3228 | 0.547241733 | 0.871712495 |
| methyl benzoate | LA3955 | 0.8826 | 0.678732104 | 0.914681245 |
| methyl benzoate | LA3956 | 0.6538 | 0.13752888  | 0.512154363 |
| methyl benzoate | LA3957 | 1.3790 | 0.550688694 | 0.874302274 |
| methyl benzoate | LA3958 | 0.6689 | 0.20567797  | 0.615224426 |
| methyl benzoate | LA3959 | 1.0265 | 0.957936925 | 0.984553949 |
| methyl benzoate | LA3960 | 0.9016 | 0.878320981 | 0.970384791 |
| methyl benzoate | LA3961 | 1.3672 | 0.479551661 | 0.838051446 |
| methyl benzoate | LA3962 | 0.9475 | 0.879469774 | 0.970384791 |
| methyl benzoate | LA3963 | 1.1522 | 0.722958581 | 0.925212938 |
| methyl benzoate | LA3964 | 2.1312 | 0.022553463 | 0.182686299 |
| methyl benzoate | LA3965 | 1.6937 | 0.118351031 | 0.476518625 |
| methyl benzoate | LA3966 | 0.9722 | 0.962138514 | 0.984553949 |
| methyl benzoate | LA3967 | 0.8215 | 0.548229184 | 0.872041817 |
| methyl benzoate | LA3968 | 0.8515 | 0.597531475 | 0.890833176 |
| methyl benzoate | LA3969 | 0.5802 | 0.132432496 | 0.504661815 |
| methyl benzoate | LA3970 | 1.9172 | 0.426382801 | 0.807680056 |
| methyl benzoate | LA3971 | 2.4172 | 0.280837668 | 0.701521032 |
| methyl benzoate | LA3976 | 0.1882 | 0.013990866 | 0.13591127  |
| methyl benzoate | LA3977 | 1.2721 | 0.722741418 | 0.925212938 |
| methyl benzoate | LA3978 | 2.0412 | 0.125653323 | 0.493580447 |
| methyl benzoate | LA3979 | 5.2071 | 0.147643713 | 0.529241957 |
| methyl benzoate | LA3980 | 1.1601 | 0.638044489 | 0.900427508 |
| methyl benzoate | LA3981 | 0.8729 | 0.819592683 | 0.959431373 |
| methyl benzoate | LA3983 | 1.4325 | 0.50506815  | 0.848714189 |
| methyl benzoate | LA3984 | 1.5499 | 0.592257303 | 0.887530928 |
| methyl benzoate | LA3985 | 0.5235 | 0.570473373 | 0.881536692 |
| methyl benzoate | LA3986 | 1.0950 | 0.855459458 | 0.968539929 |
| methyl benzoate | LA3988 | 1.7838 | 0.147885066 | 0.529241957 |
| methyl benzoate | LA3989 | 1.4556 | 0.646330213 | 0.905529102 |
| methyl benzoate | LA3990 | 0.6101 | 0.322574857 | 0.738428286 |
| methyl benzoate | LA3992 | 4.8472 | 0.166159287 | 0.555680238 |
| methyl benzoate | LA3993 | 0.5780 | 0.502007695 | 0.846360081 |
| methyl benzoate | LA3994 | 1.3122 | 0.739819479 | 0.931176005 |
| methyl benzoate | LA3995 | 4.0785 | 6.57739E-05 | 0.002607524 |
| methyl benzoate | LA3996 | 0.8823 | 0.706571565 | 0.92238941  |
| methyl benzoate | LA3997 | 1.3873 | 0.689037734 | 0.918070679 |



|                  |        |         |             |             |
|------------------|--------|---------|-------------|-------------|
| methyl benzoate  | LA3998 | 7.6827  | 6.45045E-07 | 5.33E-05    |
| methyl benzoate  | LA3999 | 1.5428  | 0.327262096 | 0.742514275 |
| methyl benzoate  | LA4000 | 0.9187  | 0.886563122 | 0.970981353 |
| methyl benzoate  | LA4001 | 2.0628  | 0.223212208 | 0.637749166 |
| methyl benzoate  | LA4002 | 1.2621  | 0.468437141 | 0.831478314 |
| methyl benzoate  | LA4003 | 0.6227  | 0.218889035 | 0.63488194  |
| methyl benzoate  | LA4004 | 0.6914  | 0.306563756 | 0.729376193 |
| methyl benzoate  | LA4005 | 0.7798  | 0.535993121 | 0.866905647 |
| methyl benzoate  | LA4006 | 0.9319  | 0.832610246 | 0.96155125  |
| methyl benzoate  | LA4007 | 1.3161  | 0.512113055 | 0.850963952 |
| methyl benzoate  | LA4008 | 2.1012  | 0.032847675 | 0.231598815 |
| methyl benzoate  | LA4009 | 1.5383  | 0.301308085 | 0.724275522 |
| methyl benzoate  | LA4010 | 1.2595  | 0.565595771 | 0.879879542 |
| methyl jasmonate | LA1777 | 38.1995 | 1.40871E-12 | 7.18E-10    |
| methyl jasmonate | LA3913 | 1.0967  | 0.773298542 | 0.943176305 |
| methyl jasmonate | LA3914 | 1.0752  | 0.874759991 | 0.970384791 |
| methyl jasmonate | LA3915 | 1.8837  | 0.094308636 | 0.417116109 |
| methyl jasmonate | LA3916 | 0.4599  | 0.091706035 | 0.411293726 |
| methyl jasmonate | LA3917 | 0.7510  | 0.57246206  | 0.881536692 |
| methyl jasmonate | LA3918 | 0.9105  | 0.734811565 | 0.929863686 |
| methyl jasmonate | LA3919 | 0.5522  | 0.197647567 | 0.607126492 |
| methyl jasmonate | LA3920 | 0.4275  | 0.094442856 | 0.417116109 |
| methyl jasmonate | LA3921 | 0.8506  | 0.561726364 | 0.877064179 |
| methyl jasmonate | LA3922 | 1.1475  | 0.71511109  | 0.924912567 |
| methyl jasmonate | LA3923 | 0.6910  | 0.523833461 | 0.856723886 |
| methyl jasmonate | LA3924 | 1.3591  | 0.354531771 | 0.762755031 |
| methyl jasmonate | LA3925 | 0.7224  | 0.41538775  | 0.798923014 |
| methyl jasmonate | LA3926 | 1.1648  | 0.684233096 | 0.91782784  |
| methyl jasmonate | LA3927 | 0.6956  | 0.310458257 | 0.732434594 |
| methyl jasmonate | LA3929 | 1.2158  | 0.700332543 | 0.919304287 |
| methyl jasmonate | LA3930 | 0.6070  | 0.325718039 | 0.740734434 |
| methyl jasmonate | LA3931 | 1.0356  | 0.897987011 | 0.973435137 |
| methyl jasmonate | LA3932 | 1.0617  | 0.8681127   | 0.970339004 |
| methyl jasmonate | LA3933 | 0.9327  | 0.9040663   | 0.973435137 |
| methyl jasmonate | LA3934 | 0.8079  | 0.505418281 | 0.84883641  |
| methyl jasmonate | LA3935 | 0.7256  | 0.204507457 | 0.613420987 |
| methyl jasmonate | LA3936 | 1.5380  | 0.280531212 | 0.701521032 |
| methyl jasmonate | LA3937 | 1.3483  | 0.297206534 | 0.720867526 |
| methyl jasmonate | LA3938 | 0.9637  | 0.879121764 | 0.970384791 |
| methyl jasmonate | LA3939 | 0.9134  | 0.770889244 | 0.94243751  |
| methyl jasmonate | LA3940 | 2.0576  | 0.091232029 | 0.410544131 |
| methyl jasmonate | LA3941 | 0.8437  | 0.737895632 | 0.93112521  |
| methyl jasmonate | LA3942 | 0.5599  | 0.078262264 | 0.375953733 |
| methyl jasmonate | LA3943 | 1.1958  | 0.499920183 | 0.845581144 |
| methyl jasmonate | LA3944 | 0.5958  | 0.132218335 | 0.504661815 |
| methyl jasmonate | LA3945 | 0.7219  | 0.41224922  | 0.795386263 |
| methyl jasmonate | LA3946 | 0.9703  | 0.927546986 | 0.979059599 |
| methyl jasmonate | LA3947 | 2.7835  | 0.026338079 | 0.202498798 |
| methyl jasmonate | LA3948 | 1.6253  | 0.291914033 | 0.712336922 |
| methyl jasmonate | LA3949 | 1.0631  | 0.848900339 | 0.966022699 |
| methyl jasmonate | LA3950 | 1.5755  | 0.431631508 | 0.813917408 |
| methyl jasmonate | LA3952 | 0.7811  | 0.473207008 | 0.835017119 |
| methyl jasmonate | LA3953 | 0.7141  | 0.244545773 | 0.666783496 |
| methyl jasmonate | LA3954 | 0.7484  | 0.465572581 | 0.831185588 |
| methyl jasmonate | LA3955 | 0.9599  | 0.87371615  | 0.970384791 |
| methyl jasmonate | LA3956 | 0.8219  | 0.42230088  | 0.805636342 |
| methyl jasmonate | LA3957 | 0.9943  | 0.99014028  | 0.995999098 |
| methyl jasmonate | LA3958 | 0.8478  | 0.543131668 | 0.869848917 |
| methyl jasmonate | LA3959 | 0.7159  | 0.430755045 | 0.813917408 |
| methyl jasmonate | LA3960 | 0.7996  | 0.698876834 | 0.919304287 |
| methyl jasmonate | LA3961 | 1.4647  | 0.31282356  | 0.732830713 |
| methyl jasmonate | LA3962 | 1.0017  | 0.995413345 | 0.998349668 |

|                         |               |               |                    |                    |
|-------------------------|---------------|---------------|--------------------|--------------------|
| methyl jasmonate        | LA3963        | 0.9189        | 0.804432978        | 0.952618           |
| methyl jasmonate        | LA3964        | 0.8930        | 0.68926161         | 0.918070679        |
| methyl jasmonate        | LA3965        | 0.9663        | 0.905302496        | 0.973435137        |
| methyl jasmonate        | LA3966        | 0.7185        | 0.515306764        | 0.851884764        |
| methyl jasmonate        | LA3967        | 0.8257        | 0.493861896        | 0.843313282        |
| methyl jasmonate        | LA3968        | 1.1868        | 0.510461979        | 0.850963952        |
| methyl jasmonate        | LA3969        | 1.2247        | 0.511859798        | 0.850963952        |
| methyl jasmonate        | LA3970        | 0.7075        | 0.620684633        | 0.898077541        |
| methyl jasmonate        | LA3971        | 1.7604        | 0.418678777        | 0.801223926        |
| methyl jasmonate        | LA3976        | 0.7900        | 0.684355503        | 0.91782784         |
| methyl jasmonate        | LA3977        | 0.6364        | 0.435676188        | 0.813917408        |
| methyl jasmonate        | LA3978        | 0.5254        | 0.106009558        | 0.442888599        |
| methyl jasmonate        | LA3979        | 0.8294        | 0.847593335        | 0.965539339        |
| methyl jasmonate        | LA3980        | 0.8989        | 0.692702698        | 0.918070679        |
| methyl jasmonate        | LA3981        | 0.7087        | 0.499201731        | 0.845355449        |
| methyl jasmonate        | LA3983        | 1.0195        | 0.966651513        | 0.985984543        |
| methyl jasmonate        | LA3984        | 1.1667        | 0.82542086         | 0.960073694        |
| methyl jasmonate        | LA3985        | 1.7669        | 0.559269666        | 0.877064179        |
| methyl jasmonate        | LA3986        | 0.7036        | 0.40902037         | 0.792655055        |
| methyl jasmonate        | LA3988        | 0.8301        | 0.585789167        | 0.885160207        |
| methyl jasmonate        | LA3989        | 0.4961        | 0.316151545        | 0.734494298        |
| methyl jasmonate        | LA3990        | 0.8077        | 0.616811763        | 0.89790427         |
| methyl jasmonate        | LA3992        | 1.0847        | 0.933435963        | 0.979385922        |
| methyl jasmonate        | LA3993        | 0.7900        | 0.735527917        | 0.930047697        |
| methyl jasmonate        | LA3994        | 1.7880        | 0.405997131        | 0.790942448        |
| methyl jasmonate        | LA3995        | 0.9403        | 0.837197819        | 0.96155125         |
| methyl jasmonate        | LA3996        | 0.7848        | 0.393916922        | 0.78271804         |
| methyl jasmonate        | LA3997        | 2.9230        | 0.125275812        | 0.492730057        |
| methyl jasmonate        | LA3998        | 1.4493        | 0.285532982        | 0.707474433        |
| methyl jasmonate        | LA3999        | 1.6998        | 0.160886391        | 0.548843207        |
| methyl jasmonate        | LA4000        | 1.1634        | 0.765705461        | 0.939855078        |
| methyl jasmonate        | LA4001        | 0.9287        | 0.884187039        | 0.970586028        |
| methyl jasmonate        | LA4002        | 0.8997        | 0.700173057        | 0.919304287        |
| methyl jasmonate        | LA4003        | 0.9190        | 0.797377569        | 0.949776318        |
| methyl jasmonate        | LA4004        | 0.9836        | 0.957227337        | 0.984553949        |
| methyl jasmonate        | LA4005        | 0.9708        | 0.931192617        | 0.979385922        |
| methyl jasmonate        | LA4006        | 1.1396        | 0.646981405        | 0.905529102        |
| methyl jasmonate        | LA4007        | 1.2116        | 0.591925688        | 0.887530928        |
| methyl jasmonate        | LA4008        | 0.9949        | 0.986390215        | 0.994252622        |
| <b>methyl jasmonate</b> | <b>LA4009</b> | <b>3.2301</b> | <b>0.001028766</b> | <b>0.022485885</b> |
| methyl jasmonate        | LA4010        | 0.6941        | 0.287468196        | 0.709397322        |
| methylsalicylate        | LA1777        | 0.8898        | 0.869755585        | 0.970339004        |
| methylsalicylate        | LA3913        | 1.2743        | 0.590908458        | 0.887088479        |
| methylsalicylate        | LA3914        | 0.8011        | 0.732027414        | 0.928544288        |
| methylsalicylate        | LA3915        | 0.6154        | 0.361713069        | 0.762755031        |
| methylsalicylate        | LA3916        | 0.7276        | 0.623409718        | 0.898077541        |
| methylsalicylate        | LA3917        | 1.5625        | 0.53187476         | 0.862371644        |
| methylsalicylate        | LA3918        | 0.5247        | 0.098332804        | 0.426201672        |
| methylsalicylate        | LA3919        | 1.1435        | 0.836161112        | 0.96155125         |
| methylsalicylate        | LA3920        | 2.8440        | 0.143786546        | 0.523171023        |
| methylsalicylate        | LA3921        | 0.8395        | 0.655635037        | 0.909027475        |
| methylsalicylate        | LA3922        | 0.4693        | 0.154044331        | 0.538779551        |
| methylsalicylate        | LA3923        | 1.0227        | 0.978008265        | 0.991290259        |
| methylsalicylate        | LA3924        | 1.4862        | 0.395605496        | 0.783022521        |
| methylsalicylate        | LA3925        | 0.6120        | 0.382356434        | 0.776384           |
| methylsalicylate        | LA3926        | 0.6371        | 0.393237263        | 0.782614296        |
| methylsalicylate        | LA3927        | 1.1581        | 0.770744331        | 0.94243751         |
| methylsalicylate        | LA3929        | 1.1061        | 0.88778194         | 0.971746934        |
| methylsalicylate        | LA3930        | 0.5302        | 0.374708926        | 0.770009547        |
| methylsalicylate        | LA3931        | 1.0332        | 0.932355188        | 0.979385922        |
| methylsalicylate        | LA3932        | 0.5068        | 0.18075361         | 0.580907176        |
| methylsalicylate        | LA3933        | 1.7573        | 0.488294307        | 0.841212822        |

|                 |        |        |             |             |
|-----------------|--------|--------|-------------|-------------|
| methysalicylate | LA3934 | 0.6973 | 0.423744542 | 0.806435222 |
| methysalicylate | LA3935 | 1.3085 | 0.44979252  | 0.821803266 |
| methysalicylate | LA3936 | 1.1289 | 0.828965242 | 0.960846076 |
| methysalicylate | LA3937 | 0.7427 | 0.460866838 | 0.82712758  |
| methysalicylate | LA3938 | 1.1572 | 0.66925793  | 0.912906394 |
| methysalicylate | LA3939 | 1.0881 | 0.847072352 | 0.965539339 |
| methysalicylate | LA3940 | 1.4037 | 0.572469365 | 0.881536692 |
| methysalicylate | LA3941 | 0.1827 | 0.017583529 | 0.155904559 |
| methysalicylate | LA3942 | 0.2589 | 0.003620078 | 0.053514197 |
| methysalicylate | LA3943 | 2.6388 | 0.009438305 | 0.107365105 |
| methysalicylate | LA3944 | 0.8744 | 0.781500229 | 0.945729687 |
| methysalicylate | LA3945 | 2.3435 | 0.128043814 | 0.497857777 |
| methysalicylate | LA3946 | 3.0734 | 0.016343763 | 0.148403308 |
| methysalicylate | LA3947 | 1.1250 | 0.855707043 | 0.968539929 |
| methysalicylate | LA3948 | 2.0991 | 0.252970355 | 0.67390054  |
| methysalicylate | LA3949 | 1.1048 | 0.825457698 | 0.960073694 |
| methysalicylate | LA3950 | 2.6165 | 0.237233017 | 0.657868733 |
| methysalicylate | LA3952 | 0.8814 | 0.794399804 | 0.948513004 |
| methysalicylate | LA3953 | 0.6426 | 0.277585135 | 0.697381374 |
| methysalicylate | LA3954 | 0.5663 | 0.309247964 | 0.731297349 |
| methysalicylate | LA3955 | 0.7204 | 0.365883351 | 0.762755031 |
| methysalicylate | LA3956 | 0.7645 | 0.43507444  | 0.813917408 |
| methysalicylate | LA3957 | 0.2163 | 0.018286612 | 0.160335337 |
| methysalicylate | LA3958 | 0.2358 | 0.000166796 | 0.005799952 |
| methysalicylate | LA3959 | 2.8364 | 0.080949341 | 0.383937025 |
| methysalicylate | LA3960 | 1.0408 | 0.960808307 | 0.984553949 |
| methysalicylate | LA3961 | 1.9843 | 0.197927308 | 0.607126492 |
| methysalicylate | LA3962 | 0.8005 | 0.602988951 | 0.891805795 |
| methysalicylate | LA3963 | 1.4262 | 0.46029056  | 0.826603954 |
| methysalicylate | LA3964 | 1.1042 | 0.803536753 | 0.952293751 |
| methysalicylate | LA3965 | 0.4862 | 0.075671783 | 0.367755808 |
| methysalicylate | LA3966 | 1.6468 | 0.485387332 | 0.84089408  |
| methysalicylate | LA3967 | 0.8429 | 0.664242703 | 0.910087458 |
| methysalicylate | LA3968 | 1.9219 | 0.074647956 | 0.366649672 |
| methysalicylate | LA3969 | 1.2950 | 0.552328019 | 0.87525828  |
| methysalicylate | LA3970 | 0.5465 | 0.53918091  | 0.868822319 |
| methysalicylate | LA3971 | 0.3974 | 0.348479471 | 0.760047884 |
| methysalicylate | LA3976 | 3.3272 | 0.140891815 | 0.517125697 |
| methysalicylate | LA3977 | 3.7272 | 0.107114294 | 0.445945224 |
| methysalicylate | LA3978 | 1.1528 | 0.799603209 | 0.951686433 |
| methysalicylate | LA3979 | 0.2795 | 0.352216893 | 0.762755031 |
| methysalicylate | LA3980 | 1.0076 | 0.984148054 | 0.993564185 |
| methysalicylate | LA3981 | 1.9204 | 0.362982042 | 0.762755031 |
| methysalicylate | LA3983 | 1.2421 | 0.738160691 | 0.93112521  |
| methysalicylate | LA3984 | 1.3711 | 0.748387682 | 0.931898617 |
| methysalicylate | LA3985 | 1.5779 | 0.739532186 | 0.931176005 |
| methysalicylate | LA3986 | 0.5548 | 0.325659778 | 0.740734434 |
| methysalicylate | LA3988 | 0.8491 | 0.733727211 | 0.929691621 |
| methysalicylate | LA3989 | 0.7027 | 0.719959092 | 0.925212938 |
| methysalicylate | LA3990 | 0.3337 | 0.067970547 | 0.354931525 |
| methysalicylate | LA3992 | 0.5890 | 0.699266935 | 0.919304287 |
| methysalicylate | LA3993 | 2.4384 | 0.36421737  | 0.762755031 |
| methysalicylate | LA3994 | 0.8912 | 0.906817714 | 0.973435137 |
| methysalicylate | LA3995 | 2.0243 | 0.094600843 | 0.417116109 |
| methysalicylate | LA3996 | 1.0734 | 0.859470973 | 0.968539929 |
| methysalicylate | LA3997 | 0.6729 | 0.687291486 | 0.91782784  |
| methysalicylate | LA3998 | 0.2710 | 0.007701842 | 0.091702866 |
| methysalicylate | LA3999 | 0.8188 | 0.707165214 | 0.92238941  |
| methysalicylate | LA4000 | 1.2915 | 0.72038857  | 0.925212938 |
| methysalicylate | LA4001 | 3.4849 | 0.080953598 | 0.383937025 |
| methysalicylate | LA4002 | 1.6791 | 0.17973566  | 0.578329253 |
| methysalicylate | LA4003 | 1.4572 | 0.416357463 | 0.799280952 |

|                    |        |         |             |             |
|--------------------|--------|---------|-------------|-------------|
| methylsalicylate   | LA4004 | 1.0881  | 0.84572573  | 0.965539339 |
| methylsalicylate   | LA4005 | 0.9481  | 0.912097623 | 0.973773422 |
| methylsalicylate   | LA4006 | 1.4931  | 0.318222562 | 0.735597447 |
| methylsalicylate   | LA4007 | 0.5068  | 0.177665799 | 0.574690639 |
| methylsalicylate   | LA4008 | 2.1003  | 0.076074976 | 0.367755808 |
| methylsalicylate   | LA4009 | 3.6116  | 0.010531838 | 0.112683302 |
| methylsalicylate   | LA4010 | 0.5567  | 0.22535838  | 0.642910426 |
| phenylacetaldehyde | LA1777 | 11.1312 | 0.002455456 | 0.041398488 |
| phenylacetaldehyde | LA3913 | 1.1742  | 0.74919705  | 0.931898617 |
| phenylacetaldehyde | LA3914 | 1.5419  | 0.548360427 | 0.872041817 |
| phenylacetaldehyde | LA3915 | 0.9699  | 0.95886079  | 0.984553949 |
| phenylacetaldehyde | LA3916 | 4.5924  | 0.034823858 | 0.239462934 |
| phenylacetaldehyde | LA3917 | 0.3872  | 0.232916741 | 0.651485583 |
| phenylacetaldehyde | LA3918 | 0.7217  | 0.452559988 | 0.824305692 |
| phenylacetaldehyde | LA3919 | 0.2624  | 0.064218477 | 0.344751824 |
| phenylacetaldehyde | LA3920 | 0.2549  | 0.086123878 | 0.398697529 |
| phenylacetaldehyde | LA3921 | 0.5855  | 0.220710927 | 0.634940929 |
| phenylacetaldehyde | LA3922 | 0.4686  | 0.199622019 | 0.609515122 |
| phenylacetaldehyde | LA3923 | 0.3785  | 0.285172171 | 0.707153033 |
| phenylacetaldehyde | LA3924 | 1.1464  | 0.792499416 | 0.947951453 |
| phenylacetaldehyde | LA3925 | 0.6115  | 0.431903862 | 0.813917408 |
| phenylacetaldehyde | LA3926 | 0.5102  | 0.252551949 | 0.67390054  |
| phenylacetaldehyde | LA3927 | 1.2727  | 0.667275407 | 0.91195299  |
| phenylacetaldehyde | LA3929 | 1.3942  | 0.67633393  | 0.914681245 |
| phenylacetaldehyde | LA3930 | 3.0461  | 0.161963658 | 0.548846947 |
| phenylacetaldehyde | LA3931 | 0.7954  | 0.592754943 | 0.887826787 |
| phenylacetaldehyde | LA3932 | 0.1688  | 0.001703963 | 0.031705198 |
| phenylacetaldehyde | LA3933 | 0.1952  | 0.071671783 | 0.36012423  |
| phenylacetaldehyde | LA3934 | 1.2439  | 0.66376233  | 0.910087458 |
| phenylacetaldehyde | LA3935 | 0.8964  | 0.782556389 | 0.946467831 |
| phenylacetaldehyde | LA3936 | 0.7265  | 0.609269196 | 0.895467694 |
| phenylacetaldehyde | LA3937 | 0.7992  | 0.617944981 | 0.898077541 |
| phenylacetaldehyde | LA3938 | 2.1392  | 0.045992553 | 0.280509999 |
| phenylacetaldehyde | LA3939 | 1.0175  | 0.971568143 | 0.9880354   |
| phenylacetaldehyde | LA3940 | 0.8151  | 0.75993756  | 0.938800538 |
| phenylacetaldehyde | LA3941 | 0.6784  | 0.625984589 | 0.898443963 |
| phenylacetaldehyde | LA3942 | 1.0568  | 0.914757259 | 0.973773422 |
| phenylacetaldehyde | LA3943 | 0.7755  | 0.540572144 | 0.869494047 |
| phenylacetaldehyde | LA3944 | 0.5049  | 0.204874591 | 0.613420987 |
| phenylacetaldehyde | LA3945 | 0.5690  | 0.365326064 | 0.762755031 |
| phenylacetaldehyde | LA3946 | 0.3237  | 0.030287488 | 0.219620174 |
| phenylacetaldehyde | LA3947 | 1.0954  | 0.899478377 | 0.973435137 |
| phenylacetaldehyde | LA3948 | 0.1702  | 0.014377816 | 0.138352569 |
| phenylacetaldehyde | LA3949 | 0.4576  | 0.120682458 | 0.481707542 |
| phenylacetaldehyde | LA3950 | 0.0482  | 0.000853841 | 0.020412136 |
| phenylacetaldehyde | LA3952 | 0.8580  | 0.776602288 | 0.944905501 |
| phenylacetaldehyde | LA3953 | 0.8865  | 0.790370349 | 0.947489068 |
| phenylacetaldehyde | LA3954 | 2.0633  | 0.244872259 | 0.666783496 |
| phenylacetaldehyde | LA3955 | 0.8262  | 0.636517313 | 0.900427508 |
| phenylacetaldehyde | LA3956 | 0.5617  | 0.132351681 | 0.504661815 |
| phenylacetaldehyde | LA3957 | 1.2653  | 0.744294791 | 0.931898617 |
| phenylacetaldehyde | LA3958 | 0.7803  | 0.559918966 | 0.877064179 |
| phenylacetaldehyde | LA3959 | 0.7220  | 0.624179867 | 0.898316986 |
| phenylacetaldehyde | LA3960 | 1.7946  | 0.518653189 | 0.854488751 |
| phenylacetaldehyde | LA3961 | 1.7083  | 0.366250492 | 0.762755031 |
| phenylacetaldehyde | LA3962 | 0.5184  | 0.168199304 | 0.55831688  |
| phenylacetaldehyde | LA3963 | 0.8575  | 0.77395938  | 0.943176305 |
| phenylacetaldehyde | LA3964 | 0.4143  | 0.047297401 | 0.284478263 |
| phenylacetaldehyde | LA3965 | 0.2373  | 0.001501875 | 0.029693273 |
| phenylacetaldehyde | LA3966 | 0.8735  | 0.86511658  | 0.968539929 |
| phenylacetaldehyde | LA3967 | 1.3476  | 0.496467942 | 0.844594188 |
| phenylacetaldehyde | LA3968 | 0.8615  | 0.714648705 | 0.924912567 |

|                    |        |        |             |             |
|--------------------|--------|--------|-------------|-------------|
| phenylacetaldehyde | LA3969 | 1.4250 | 0.464721296 | 0.830774612 |
| phenylacetaldehyde | LA3970 | 0.7354 | 0.779119611 | 0.945579457 |
| phenylacetaldehyde | LA3971 | 2.6412 | 0.375621484 | 0.77057623  |
| phenylacetaldehyde | LA3976 | 0.3559 | 0.255806903 | 0.676550668 |
| phenylacetaldehyde | LA3977 | 0.7429 | 0.743640882 | 0.931898617 |
| phenylacetaldehyde | LA3978 | 0.7256 | 0.607088344 | 0.894095025 |
| phenylacetaldehyde | LA3979 | 0.5904 | 0.729821274 | 0.927430689 |
| phenylacetaldehyde | LA3980 | 2.3861 | 0.039977141 | 0.258697627 |
| phenylacetaldehyde | LA3981 | 1.2382 | 0.789114417 | 0.947308794 |
| phenylacetaldehyde | LA3983 | 1.0758 | 0.919435633 | 0.975991511 |
| phenylacetaldehyde | LA3984 | 2.0619 | 0.509143186 | 0.850889213 |
| phenylacetaldehyde | LA3985 | 1.7455 | 0.715428465 | 0.924912567 |
| phenylacetaldehyde | LA3986 | 2.5528 | 0.160455367 | 0.548843207 |
| phenylacetaldehyde | LA3988 | 1.6618 | 0.342927755 | 0.755811393 |
| phenylacetaldehyde | LA3989 | 0.9750 | 0.981553766 | 0.992624221 |
| phenylacetaldehyde | LA3990 | 0.5803 | 0.416061264 | 0.799213727 |
| phenylacetaldehyde | LA3992 | 1.1054 | 0.947653671 | 0.982875948 |
| phenylacetaldehyde | LA3993 | 0.3653 | 0.357361602 | 0.762755031 |
| phenylacetaldehyde | LA3994 | 1.4786 | 0.721225336 | 0.925212938 |
| phenylacetaldehyde | LA3995 | 0.3971 | 0.04942648  | 0.293110521 |
| phenylacetaldehyde | LA3996 | 1.2695 | 0.592267371 | 0.887530928 |
| phenylacetaldehyde | LA3997 | 1.1219 | 0.916437343 | 0.974606828 |
| phenylacetaldehyde | LA3998 | 3.9354 | 0.012030131 | 0.122707336 |
| phenylacetaldehyde | LA3999 | 0.6906 | 0.53231955  | 0.862371644 |
| phenylacetaldehyde | LA4000 | 0.2351 | 0.069200711 | 0.356649926 |
| phenylacetaldehyde | LA4001 | 0.5387 | 0.437173411 | 0.814212196 |
| phenylacetaldehyde | LA4002 | 0.5905 | 0.220716244 | 0.634940929 |
| phenylacetaldehyde | LA4003 | 0.4171 | 0.090327565 | 0.408300695 |
| phenylacetaldehyde | LA4004 | 0.7709 | 0.590361203 | 0.887088479 |
| phenylacetaldehyde | LA4005 | 0.7690 | 0.625570713 | 0.898316986 |
| phenylacetaldehyde | LA4006 | 1.0546 | 0.905299817 | 0.973435137 |
| phenylacetaldehyde | LA4007 | 0.9196 | 0.881243453 | 0.970384791 |
| phenylacetaldehyde | LA4008 | 2.5353 | 0.045900479 | 0.280509999 |
| phenylacetaldehyde | LA4009 | 0.3509 | 0.060847512 | 0.334880192 |
| phenylacetaldehyde | LA4010 | 0.7981 | 0.674984997 | 0.914322307 |
| trans-2-heptenal   | LA1777 | 0.9222 | 0.855216619 | 0.968539929 |
| trans-2-heptenal   | LA3913 | 0.9196 | 0.765440268 | 0.939855078 |
| trans-2-heptenal   | LA3914 | 1.2140 | 0.630852371 | 0.898759707 |
| trans-2-heptenal   | LA3915 | 0.8708 | 0.676478    | 0.914681245 |
| trans-2-heptenal   | LA3916 | 0.6968 | 0.370741283 | 0.765498196 |
| trans-2-heptenal   | LA3917 | 0.4821 | 0.101236766 | 0.43448037  |
| trans-2-heptenal   | LA3918 | 0.7141 | 0.165916504 | 0.555475385 |
| trans-2-heptenal   | LA3919 | 0.4790 | 0.068758328 | 0.356007587 |
| trans-2-heptenal   | LA3920 | 0.3798 | 0.029900151 | 0.218077523 |
| trans-2-heptenal   | LA3921 | 0.6536 | 0.082158307 | 0.387371987 |
| trans-2-heptenal   | LA3922 | 0.5356 | 0.059123369 | 0.329106399 |
| trans-2-heptenal   | LA3923 | 0.7052 | 0.492119994 | 0.842690085 |
| trans-2-heptenal   | LA3924 | 1.1732 | 0.582613872 | 0.883886192 |
| trans-2-heptenal   | LA3925 | 1.1455 | 0.697949344 | 0.919304287 |
| trans-2-heptenal   | LA3926 | 1.1591 | 0.653467332 | 0.907895049 |
| trans-2-heptenal   | LA3927 | 0.9415 | 0.847526459 | 0.965539339 |
| trans-2-heptenal   | LA3929 | 0.7826 | 0.582100163 | 0.883886192 |
| trans-2-heptenal   | LA3930 | 0.8979 | 0.808953072 | 0.953768655 |
| trans-2-heptenal   | LA3931 | 0.5453 | 0.011492896 | 0.119142527 |
| trans-2-heptenal   | LA3932 | 0.9334 | 0.827562445 | 0.96011005  |
| trans-2-heptenal   | LA3933 | 0.5235 | 0.201802054 | 0.610979478 |
| trans-2-heptenal   | LA3934 | 1.4638 | 0.175088241 | 0.570575098 |
| trans-2-heptenal   | LA3935 | 1.4535 | 0.091801835 | 0.411293726 |
| trans-2-heptenal   | LA3936 | 0.6848 | 0.27920631  | 0.699730801 |
| trans-2-heptenal   | LA3937 | 1.3164 | 0.27419513  | 0.695142583 |
| trans-2-heptenal   | LA3938 | 1.1323 | 0.559601851 | 0.877064179 |
| trans-2-heptenal   | LA3939 | 0.7584 | 0.310593338 | 0.732434594 |



|                  |        |        |             |             |
|------------------|--------|--------|-------------|-------------|
| trans-2-heptenal | LA3940 | 0.8157 | 0.586323297 | 0.885160207 |
| trans-2-heptenal | LA3941 | 1.3777 | 0.471844719 | 0.834110248 |
| trans-2-heptenal | LA3942 | 0.9872 | 0.964421986 | 0.98535268  |
| trans-2-heptenal | LA3943 | 0.8768 | 0.571560954 | 0.881536692 |
| trans-2-heptenal | LA3944 | 0.7993 | 0.457346773 | 0.826457792 |
| trans-2-heptenal | LA3945 | 1.0804 | 0.824332745 | 0.960073694 |
| trans-2-heptenal | LA3946 | 0.5329 | 0.030708202 | 0.22214444  |
| trans-2-heptenal | LA3947 | 1.4390 | 0.36719005  | 0.762798067 |
| trans-2-heptenal | LA3948 | 0.7380 | 0.452071792 | 0.823906899 |
| trans-2-heptenal | LA3949 | 0.8911 | 0.682329706 | 0.917367707 |
| trans-2-heptenal | LA3950 | 0.4285 | 0.09476969  | 0.417259355 |
| trans-2-heptenal | LA3952 | 1.2930 | 0.394798358 | 0.783022521 |
| trans-2-heptenal | LA3953 | 0.7914 | 0.356402343 | 0.762755031 |
| trans-2-heptenal | LA3954 | 1.1194 | 0.745980289 | 0.931898617 |
| trans-2-heptenal | LA3955 | 0.8138 | 0.361869257 | 0.762755031 |
| trans-2-heptenal | LA3956 | 0.7608 | 0.202259778 | 0.610979478 |
| trans-2-heptenal | LA3957 | 0.9761 | 0.95215792  | 0.983631127 |
| trans-2-heptenal | LA3958 | 0.9800 | 0.932205184 | 0.979385922 |
| trans-2-heptenal | LA3959 | 1.1145 | 0.770659127 | 0.94243751  |
| trans-2-heptenal | LA3960 | 0.6872 | 0.459272564 | 0.826457792 |
| trans-2-heptenal | LA3961 | 1.6155 | 0.148144025 | 0.529241957 |
| trans-2-heptenal | LA3962 | 0.9453 | 0.832863359 | 0.96155125  |
| trans-2-heptenal | LA3963 | 1.1232 | 0.698123247 | 0.919304287 |
| trans-2-heptenal | LA3964 | 1.1856 | 0.492751863 | 0.843121844 |
| trans-2-heptenal | LA3965 | 1.9145 | 0.01031695  | 0.111468635 |
| trans-2-heptenal | LA3966 | 0.7236 | 0.46781328  | 0.831478314 |
| trans-2-heptenal | LA3967 | 1.2738 | 0.32414391  | 0.739106084 |
| trans-2-heptenal | LA3968 | 1.0289 | 0.900556759 | 0.973435137 |
| trans-2-heptenal | LA3969 | 1.4620 | 0.1613004   | 0.548846947 |
| trans-2-heptenal | LA3970 | 0.8214 | 0.748283679 | 0.931898617 |
| trans-2-heptenal | LA3971 | 0.9539 | 0.938666451 | 0.979979304 |
| trans-2-heptenal | LA3976 | 0.5655 | 0.262316492 | 0.681073935 |
| trans-2-heptenal | LA3977 | 0.5909 | 0.300780523 | 0.724275522 |
| trans-2-heptenal | LA3978 | 0.8414 | 0.620645211 | 0.898077541 |
| trans-2-heptenal | LA3979 | 1.4999 | 0.634833671 | 0.899764258 |
| trans-2-heptenal | LA3980 | 1.2060 | 0.428516987 | 0.810922684 |
| trans-2-heptenal | LA3981 | 1.1858 | 0.702920513 | 0.920138121 |
| trans-2-heptenal | LA3983 | 1.4993 | 0.316360616 | 0.734494298 |
| trans-2-heptenal | LA3984 | 1.5737 | 0.459669566 | 0.826457792 |
| trans-2-heptenal | LA3985 | 1.9222 | 0.444655139 | 0.819621532 |
| trans-2-heptenal | LA3986 | 0.8658 | 0.6995958   | 0.919304287 |
| trans-2-heptenal | LA3988 | 1.2839 | 0.404261599 | 0.79044121  |
| trans-2-heptenal | LA3989 | 0.7386 | 0.621215409 | 0.898077541 |
| trans-2-heptenal | LA3990 | 0.9334 | 0.853952054 | 0.968539929 |
| trans-2-heptenal | LA3992 | 0.5763 | 0.518605874 | 0.854488751 |
| trans-2-heptenal | LA3993 | 0.4692 | 0.216513521 | 0.63158377  |
| trans-2-heptenal | LA3994 | 1.5751 | 0.458744085 | 0.826457792 |
| trans-2-heptenal | LA3995 | 0.4655 | 0.00368993  | 0.054025315 |
| trans-2-heptenal | LA3996 | 1.3280 | 0.255316105 | 0.675836749 |
| trans-2-heptenal | LA3997 | 1.0394 | 0.949756237 | 0.982875948 |
| trans-2-heptenal | LA3998 | 0.9746 | 0.932587015 | 0.979385922 |
| trans-2-heptenal | LA3999 | 0.8472 | 0.617089111 | 0.89790427  |
| trans-2-heptenal | LA4000 | 0.9177 | 0.847035287 | 0.965539339 |
| trans-2-heptenal | LA4001 | 0.4286 | 0.05739348  | 0.323879039 |
| trans-2-heptenal | LA4002 | 0.9234 | 0.740515933 | 0.931176005 |
| trans-2-heptenal | LA4003 | 0.5266 | 0.026513798 | 0.203338902 |
| trans-2-heptenal | LA4004 | 0.9321 | 0.794857102 | 0.948513004 |
| trans-2-heptenal | LA4005 | 0.9556 | 0.879981731 | 0.970384791 |
| trans-2-heptenal | LA4006 | 1.4661 | 0.126457366 | 0.4942012   |
| trans-2-heptenal | LA4007 | 1.0327 | 0.918423011 | 0.975824449 |
| trans-2-heptenal | LA4008 | 1.8887 | 0.014787185 | 0.13968405  |
| trans-2-heptenal | LA4009 | 2.0667 | 0.020257565 | 0.171712324 |

|                  |        |        |             |             |
|------------------|--------|--------|-------------|-------------|
| trans-2-heptenal | LA4010 | 1.1085 | 0.732214826 | 0.928544288 |
| trans-2-hexenal  | LA1777 | 3.3050 | 0.059153111 | 0.329106399 |
| trans-2-hexenal  | LA3913 | 1.2645 | 0.558159875 | 0.877064179 |
| trans-2-hexenal  | LA3914 | 2.3914 | 0.12995245  | 0.502089011 |
| trans-2-hexenal  | LA3915 | 1.5200 | 0.37597069  | 0.77057623  |
| trans-2-hexenal  | LA3916 | 0.8447 | 0.769191748 | 0.94243751  |
| trans-2-hexenal  | LA3917 | 0.3349 | 0.084811313 | 0.395011595 |
| trans-2-hexenal  | LA3918 | 1.0644 | 0.856859734 | 0.968539929 |
| trans-2-hexenal  | LA3919 | 0.2955 | 0.034552357 | 0.23835125  |
| trans-2-hexenal  | LA3920 | 0.2710 | 0.039988228 | 0.258697627 |
| trans-2-hexenal  | LA3921 | 1.0617 | 0.863713568 | 0.968539929 |
| trans-2-hexenal  | LA3922 | 0.9254 | 0.86923259  | 0.970339004 |
| trans-2-hexenal  | LA3923 | 0.6669 | 0.57617076  | 0.882423686 |
| trans-2-hexenal  | LA3924 | 0.7846 | 0.558217678 | 0.877064179 |
| trans-2-hexenal  | LA3925 | 0.8204 | 0.691727086 | 0.918070679 |
| trans-2-hexenal  | LA3926 | 1.0727 | 0.881121336 | 0.970384791 |
| trans-2-hexenal  | LA3927 | 0.5970 | 0.249099726 | 0.669223144 |
| trans-2-hexenal  | LA3929 | 0.9769 | 0.970680253 | 0.9880354   |
| trans-2-hexenal  | LA3930 | 1.2295 | 0.744908107 | 0.931898617 |
| trans-2-hexenal  | LA3931 | 0.8734 | 0.691786624 | 0.918070679 |
| trans-2-hexenal  | LA3932 | 0.2224 | 0.000892081 | 0.02070964  |
| trans-2-hexenal  | LA3933 | 0.6898 | 0.607406483 | 0.894095025 |
| trans-2-hexenal  | LA3934 | 1.2905 | 0.524178918 | 0.856830924 |
| trans-2-hexenal  | LA3935 | 4.1175 | 8.55951E-06 | 0.000503694 |
| trans-2-hexenal  | LA3936 | 0.7627 | 0.586986471 | 0.88525313  |
| trans-2-hexenal  | LA3937 | 2.2785 | 0.021776138 | 0.178653625 |
| trans-2-hexenal  | LA3938 | 2.6528 | 0.00135921  | 0.027727884 |
| trans-2-hexenal  | LA3939 | 1.1001 | 0.806108956 | 0.953295916 |
| trans-2-hexenal  | LA3940 | 2.3559 | 0.108638875 | 0.449528061 |
| trans-2-hexenal  | LA3941 | 0.5375 | 0.328348179 | 0.742514275 |
| trans-2-hexenal  | LA3942 | 0.3529 | 0.011524898 | 0.119142527 |
| trans-2-hexenal  | LA3943 | 1.2237 | 0.54247314  | 0.869848917 |
| trans-2-hexenal  | LA3944 | 0.5980 | 0.23171694  | 0.650173777 |
| trans-2-hexenal  | LA3945 | 1.6884 | 0.291918464 | 0.712336922 |
| trans-2-hexenal  | LA3946 | 0.6860 | 0.363461747 | 0.762755031 |
| trans-2-hexenal  | LA3947 | 1.9896 | 0.232022799 | 0.650173777 |
| trans-2-hexenal  | LA3948 | 1.4160 | 0.546008556 | 0.871108541 |
| trans-2-hexenal  | LA3949 | 1.2850 | 0.532287468 | 0.862371644 |
| trans-2-hexenal  | LA3950 | 0.7735 | 0.722280205 | 0.925212938 |
| trans-2-hexenal  | LA3952 | 0.6039 | 0.241621166 | 0.661303851 |
| trans-2-hexenal  | LA3953 | 1.0317 | 0.93132263  | 0.979385922 |
| trans-2-hexenal  | LA3954 | 1.1125 | 0.830073095 | 0.961227152 |
| trans-2-hexenal  | LA3955 | 1.4979 | 0.209984769 | 0.620240317 |
| trans-2-hexenal  | LA3956 | 0.9786 | 0.943641528 | 0.98245006  |
| trans-2-hexenal  | LA3957 | 0.8309 | 0.747484632 | 0.931898617 |
| trans-2-hexenal  | LA3958 | 2.0135 | 0.039449296 | 0.257293785 |
| trans-2-hexenal  | LA3959 | 1.6182 | 0.364077883 | 0.762755031 |
| trans-2-hexenal  | LA3960 | 2.7509 | 0.161671709 | 0.548846947 |
| trans-2-hexenal  | LA3961 | 2.2921 | 0.07954769  | 0.380337393 |
| trans-2-hexenal  | LA3962 | 1.1814 | 0.661001654 | 0.90958877  |
| trans-2-hexenal  | LA3963 | 1.1007 | 0.82223686  | 0.960073694 |
| trans-2-hexenal  | LA3964 | 2.0194 | 0.047320077 | 0.284478263 |
| trans-2-hexenal  | LA3965 | 1.6269 | 0.176971551 | 0.573316966 |
| trans-2-hexenal  | LA3966 | 2.3792 | 0.172600818 | 0.567302366 |
| trans-2-hexenal  | LA3967 | 2.4284 | 0.011386013 | 0.118507482 |
| trans-2-hexenal  | LA3968 | 1.9920 | 0.034373178 | 0.237996948 |
| trans-2-hexenal  | LA3969 | 0.3859 | 0.013907166 | 0.135708369 |
| trans-2-hexenal  | LA3970 | 1.1169 | 0.899376048 | 0.973435137 |
| trans-2-hexenal  | LA3971 | 2.3235 | 0.334968796 | 0.749272307 |
| trans-2-hexenal  | LA3976 | 0.9990 | 0.998887696 | 0.999445043 |
| trans-2-hexenal  | LA3977 | 1.4945 | 0.579382233 | 0.883886192 |
| trans-2-hexenal  | LA3978 | 0.7313 | 0.529459636 | 0.861522302 |

|                  |        |        |             |             |
|------------------|--------|--------|-------------|-------------|
| trans-2-hexenal  | LA3979 | 1.0705 | 0.955359109 | 0.984553949 |
| trans-2-hexenal  | LA3980 | 1.7291 | 0.104730019 | 0.439607487 |
| trans-2-hexenal  | LA3981 | 1.6615 | 0.425565241 | 0.807342358 |
| trans-2-hexenal  | LA3983 | 2.1025 | 0.197336887 | 0.607126492 |
| trans-2-hexenal  | LA3984 | 1.2783 | 0.778785158 | 0.945579457 |
| trans-2-hexenal  | LA3985 | 0.9426 | 0.961309445 | 0.984553949 |
| trans-2-hexenal  | LA3986 | 0.3535 | 0.050998013 | 0.300103692 |
| trans-2-hexenal  | LA3988 | 1.7404 | 0.194703943 | 0.603082119 |
| trans-2-hexenal  | LA3989 | 1.8765 | 0.471583165 | 0.834110248 |
| trans-2-hexenal  | LA3990 | 1.1840 | 0.751706783 | 0.933576836 |
| trans-2-hexenal  | LA3992 | 0.5283 | 0.600150931 | 0.890833176 |
| trans-2-hexenal  | LA3993 | 0.6202 | 0.584046917 | 0.884306564 |
| trans-2-hexenal  | LA3994 | 0.8389 | 0.840744888 | 0.963216984 |
| trans-2-hexenal  | LA3995 | 1.5456 | 0.245140991 | 0.666783496 |
| trans-2-hexenal  | LA3996 | 1.8430 | 0.085671195 | 0.397682496 |
| trans-2-hexenal  | LA3997 | 2.7879 | 0.241059499 | 0.661303851 |
| trans-2-hexenal  | LA3998 | 2.7800 | 0.018763618 | 0.163099916 |
| trans-2-hexenal  | LA3999 | 0.3677 | 0.034584299 | 0.23835125  |
| trans-2-hexenal  | LA4000 | 1.4603 | 0.550993934 | 0.874302274 |
| trans-2-hexenal  | LA4001 | 0.2677 | 0.038196138 | 0.252987408 |
| trans-2-hexenal  | LA4002 | 2.1473 | 0.02611286  | 0.202292029 |
| trans-2-hexenal  | LA4003 | 1.0908 | 0.832699136 | 0.96155125  |
| trans-2-hexenal  | LA4004 | 0.9013 | 0.78758373  | 0.947232543 |
| trans-2-hexenal  | LA4005 | 1.0571 | 0.897048812 | 0.973435137 |
| trans-2-hexenal  | LA4006 | 1.1737 | 0.653505363 | 0.907895049 |
| trans-2-hexenal  | LA4007 | 1.2057 | 0.676095675 | 0.914681245 |
| trans-2-hexenal  | LA4008 | 2.7564 | 0.006437774 | 0.080406483 |
| trans-2-hexenal  | LA4009 | 1.9131 | 0.145237282 | 0.525326339 |
| trans-2-hexenal  | LA4010 | 0.5069 | 0.113581976 | 0.466240054 |
| trans-2-pentenal | LA1777 | 0.8108 | 0.62855409  | 0.898759707 |
| trans-2-pentenal | LA3913 | 0.8866 | 0.660981049 | 0.90958877  |
| trans-2-pentenal | LA3914 | 1.5754 | 0.248989216 | 0.669223144 |
| trans-2-pentenal | LA3915 | 1.7811 | 0.07498137  | 0.367026127 |
| trans-2-pentenal | LA3916 | 0.4150 | 0.025886276 | 0.201045697 |
| trans-2-pentenal | LA3917 | 0.3262 | 0.010073893 | 0.110480627 |
| trans-2-pentenal | LA3918 | 0.9384 | 0.792585995 | 0.947951453 |
| trans-2-pentenal | LA3919 | 0.2884 | 0.004348439 | 0.060209155 |
| trans-2-pentenal | LA3920 | 0.2811 | 0.003601956 | 0.053504783 |
| trans-2-pentenal | LA3921 | 1.1007 | 0.687788434 | 0.91782784  |
| trans-2-pentenal | LA3922 | 1.1391 | 0.686644103 | 0.91782784  |
| trans-2-pentenal | LA3923 | 0.4137 | 0.075750359 | 0.367755808 |
| trans-2-pentenal | LA3924 | 1.1928 | 0.534422592 | 0.865255625 |
| trans-2-pentenal | LA3925 | 1.2017 | 0.591102421 | 0.887088479 |
| trans-2-pentenal | LA3926 | 1.6299 | 0.128595404 | 0.498735027 |
| trans-2-pentenal | LA3927 | 1.1384 | 0.672324113 | 0.913734467 |
| trans-2-pentenal | LA3929 | 1.3272 | 0.515130568 | 0.851884764 |
| trans-2-pentenal | LA3930 | 1.3751 | 0.463998629 | 0.830313336 |
| trans-2-pentenal | LA3931 | 0.8004 | 0.341212311 | 0.754299522 |
| trans-2-pentenal | LA3932 | 1.0563 | 0.859264434 | 0.968539929 |
| trans-2-pentenal | LA3933 | 0.6178 | 0.33070627  | 0.74425851  |
| trans-2-pentenal | LA3934 | 1.5919 | 0.090333193 | 0.408300695 |
| trans-2-pentenal | LA3935 | 2.5109 | 2.34267E-05 | 0.001054202 |
| trans-2-pentenal | LA3936 | 1.0046 | 0.98918646  | 0.995605194 |
| trans-2-pentenal | LA3937 | 1.7095 | 0.029159298 | 0.215525246 |
| trans-2-pentenal | LA3938 | 1.6048 | 0.023153346 | 0.185956007 |
| trans-2-pentenal | LA3939 | 1.1367 | 0.630498287 | 0.898759707 |
| trans-2-pentenal | LA3940 | 0.9168 | 0.812153451 | 0.956577968 |
| trans-2-pentenal | LA3941 | 0.7664 | 0.54073437  | 0.869494047 |
| trans-2-pentenal | LA3942 | 1.0131 | 0.963046999 | 0.984553949 |
| trans-2-pentenal | LA3943 | 1.0778 | 0.741267418 | 0.931176005 |
| trans-2-pentenal | LA3944 | 1.2214 | 0.496934879 | 0.844594188 |
| trans-2-pentenal | LA3945 | 0.8723 | 0.688161226 | 0.91782784  |

|                  |        |        |             |             |
|------------------|--------|--------|-------------|-------------|
| trans-2-pentenal | LA3946 | 0.6042 | 0.076334878 | 0.368430168 |
| trans-2-pentenal | LA3947 | 2.0875 | 0.062118345 | 0.338827336 |
| trans-2-pentenal | LA3948 | 2.0616 | 0.066994547 | 0.351606481 |
| trans-2-pentenal | LA3949 | 1.3612 | 0.2623984   | 0.681073935 |
| trans-2-pentenal | LA3950 | 0.0439 | 4.44584E-10 | 1.13E-07    |
| trans-2-pentenal | LA3952 | 0.9428 | 0.841689768 | 0.963550576 |
| trans-2-pentenal | LA3953 | 0.9959 | 0.986779481 | 0.994252622 |
| trans-2-pentenal | LA3954 | 1.8343 | 0.074798516 | 0.366800415 |
| trans-2-pentenal | LA3955 | 1.0476 | 0.833187927 | 0.96155125  |
| trans-2-pentenal | LA3956 | 0.8635 | 0.483330359 | 0.839381895 |
| trans-2-pentenal | LA3957 | 0.8665 | 0.716272907 | 0.924993642 |
| trans-2-pentenal | LA3958 | 1.1117 | 0.648732237 | 0.906447783 |
| trans-2-pentenal | LA3959 | 1.2572 | 0.528540604 | 0.860823737 |
| trans-2-pentenal | LA3960 | 2.9166 | 0.030822943 | 0.222448598 |
| trans-2-pentenal | LA3961 | 1.4081 | 0.290612181 | 0.712336922 |
| trans-2-pentenal | LA3962 | 0.8355 | 0.489937984 | 0.841212822 |
| trans-2-pentenal | LA3963 | 1.7902 | 0.04679745  | 0.283522224 |
| trans-2-pentenal | LA3964 | 1.1939 | 0.464799391 | 0.830774612 |
| trans-2-pentenal | LA3965 | 1.0366 | 0.884167835 | 0.970586028 |
| trans-2-pentenal | LA3966 | 0.8213 | 0.650993624 | 0.907895049 |
| trans-2-pentenal | LA3967 | 1.4728 | 0.106472613 | 0.443877651 |
| trans-2-pentenal | LA3968 | 1.2908 | 0.252124825 | 0.67390054  |
| trans-2-pentenal | LA3969 | 0.6793 | 0.144332992 | 0.523913352 |
| trans-2-pentenal | LA3970 | 1.2905 | 0.670224769 | 0.912906394 |
| trans-2-pentenal | LA3971 | 2.4354 | 0.137423084 | 0.512154363 |
| trans-2-pentenal | LA3976 | 0.4572 | 0.115242525 | 0.468938998 |
| trans-2-pentenal | LA3977 | 0.1730 | 0.000431643 | 0.01257931  |
| trans-2-pentenal | LA3978 | 0.8117 | 0.54046506  | 0.869494047 |
| trans-2-pentenal | LA3979 | 1.4259 | 0.670359695 | 0.912906394 |
| trans-2-pentenal | LA3980 | 0.9592 | 0.857013639 | 0.968539929 |
| trans-2-pentenal | LA3981 | 0.2034 | 0.000279379 | 0.008587542 |
| trans-2-pentenal | LA3983 | 1.2246 | 0.607652727 | 0.894095025 |
| trans-2-pentenal | LA3984 | 0.6063 | 0.403441446 | 0.789846977 |
| trans-2-pentenal | LA3985 | 0.0544 | 0.000512417 | 0.014254509 |
| trans-2-pentenal | LA3986 | 0.1386 | 7.89896E-08 | 1.10E-05    |
| trans-2-pentenal | LA3988 | 1.0832 | 0.784702251 | 0.946467831 |
| trans-2-pentenal | LA3989 | 2.5403 | 0.119770172 | 0.479080688 |
| trans-2-pentenal | LA3990 | 0.8327 | 0.616449717 | 0.89790427  |
| trans-2-pentenal | LA3992 | 0.7362 | 0.713413562 | 0.924627488 |
| trans-2-pentenal | LA3993 | 0.5375 | 0.299085286 | 0.722336997 |
| trans-2-pentenal | LA3994 | 0.5199 | 0.27482699  | 0.695223068 |
| trans-2-pentenal | LA3995 | 0.9977 | 0.992724606 | 0.997614875 |
| trans-2-pentenal | LA3996 | 1.5847 | 0.058861418 | 0.329106399 |
| trans-2-pentenal | LA3997 | 1.4868 | 0.507763097 | 0.849975425 |
| trans-2-pentenal | LA3998 | 1.4342 | 0.225667218 | 0.642910426 |
| trans-2-pentenal | LA3999 | 0.7527 | 0.406340198 | 0.790967561 |
| trans-2-pentenal | LA4000 | 1.1570 | 0.73744215  | 0.93112521  |
| trans-2-pentenal | LA4001 | 0.1014 | 1.8264E-07  | 2.00E-05    |
| trans-2-pentenal | LA4002 | 1.8961 | 0.006591702 | 0.081333097 |
| trans-2-pentenal | LA4003 | 1.1580 | 0.602684287 | 0.891786227 |
| trans-2-pentenal | LA4004 | 1.7124 | 0.041942495 | 0.265722639 |
| trans-2-pentenal | LA4005 | 1.4259 | 0.227790107 | 0.645211409 |
| trans-2-pentenal | LA4006 | 0.6671 | 0.097846028 | 0.426201672 |
| trans-2-pentenal | LA4007 | 2.3341 | 0.005826117 | 0.074654397 |
| trans-2-pentenal | LA4008 | 2.7106 | 9.53566E-05 | 0.003473705 |
| trans-2-pentenal | LA4009 | 2.1222 | 0.013765159 | 0.135438542 |
| trans-2-pentenal | LA4010 | 0.6815 | 0.192248883 | 0.599675415 |
| valeraldehyde    | LA1777 | 2.4701 | 0.000893357 | 0.02070964  |
| valeraldehyde    | LA3913 | 0.6746 | 0.02212935  | 0.180095242 |
| valeraldehyde    | LA3914 | 1.5034 | 0.098573093 | 0.426638847 |
| valeraldehyde    | LA3915 | 1.1769 | 0.42154871  | 0.80470309  |
| valeraldehyde    | LA3916 | 0.7519 | 0.247712808 | 0.669223144 |

|               |        |        |             |             |
|---------------|--------|--------|-------------|-------------|
| valeraldehyde | LA3917 | 0.7234 | 0.233873479 | 0.652967925 |
| valeraldehyde | LA3918 | 0.9128 | 0.539029626 | 0.868822319 |
| valeraldehyde | LA3919 | 0.7836 | 0.323350526 | 0.738948924 |
| valeraldehyde | LA3920 | 0.6053 | 0.065309533 | 0.347929589 |
| valeraldehyde | LA3921 | 1.0334 | 0.825968901 | 0.960073694 |
| valeraldehyde | LA3922 | 1.1387 | 0.520355395 | 0.854488751 |
| valeraldehyde | LA3923 | 0.7978 | 0.467231789 | 0.831478314 |
| valeraldehyde | LA3924 | 1.4133 | 0.051703481 | 0.303671117 |
| valeraldehyde | LA3925 | 1.0585 | 0.790503134 | 0.947489068 |
| valeraldehyde | LA3926 | 1.3273 | 0.159286841 | 0.547660375 |
| valeraldehyde | LA3927 | 1.1998 | 0.342208912 | 0.75535392  |
| valeraldehyde | LA3929 | 0.7466 | 0.28300131  | 0.70405204  |
| valeraldehyde | LA3930 | 1.2701 | 0.379696825 | 0.774065479 |
| valeraldehyde | LA3931 | 0.8611 | 0.306909212 | 0.729376193 |
| valeraldehyde | LA3932 | 1.0714 | 0.721043559 | 0.925212938 |
| valeraldehyde | LA3933 | 1.0942 | 0.771395126 | 0.942679347 |
| valeraldehyde | LA3934 | 1.6116 | 0.005540903 | 0.072149631 |
| valeraldehyde | LA3935 | 1.4880 | 0.003427601 | 0.052442295 |
| valeraldehyde | LA3936 | 0.8201 | 0.35352333  | 0.762755031 |
| valeraldehyde | LA3937 | 1.7516 | 0.000279333 | 0.008587542 |
| valeraldehyde | LA3938 | 1.4712 | 0.003090829 | 0.048439097 |
| valeraldehyde | LA3939 | 1.1227 | 0.487535849 | 0.841212822 |
| valeraldehyde | LA3940 | 1.0555 | 0.813475091 | 0.957765979 |
| valeraldehyde | LA3941 | 0.9702 | 0.911362579 | 0.973773422 |
| valeraldehyde | LA3942 | 0.7323 | 0.077629908 | 0.373902329 |
| valeraldehyde | LA3943 | 1.0218 | 0.879350572 | 0.970384791 |
| valeraldehyde | LA3944 | 0.8467 | 0.366522604 | 0.762755031 |
| valeraldehyde | LA3945 | 1.1185 | 0.599046406 | 0.890833176 |
| valeraldehyde | LA3946 | 0.7588 | 0.120741727 | 0.481707542 |
| valeraldehyde | LA3947 | 1.5518 | 0.07508443  | 0.367026127 |
| valeraldehyde | LA3948 | 1.0295 | 0.906361247 | 0.973435137 |
| valeraldehyde | LA3949 | 0.8625 | 0.390175504 | 0.781231942 |
| valeraldehyde | LA3950 | 0.8718 | 0.657752832 | 0.909477364 |
| valeraldehyde | LA3952 | 1.1531 | 0.440144297 | 0.815452569 |
| valeraldehyde | LA3953 | 1.0048 | 0.975280673 | 0.990494145 |
| valeraldehyde | LA3954 | 1.4188 | 0.100601674 | 0.43296923  |
| valeraldehyde | LA3955 | 1.0710 | 0.619600024 | 0.898077541 |
| valeraldehyde | LA3956 | 0.8221 | 0.134870071 | 0.508254208 |
| valeraldehyde | LA3957 | 1.0437 | 0.862446262 | 0.968539929 |
| valeraldehyde | LA3958 | 1.0177 | 0.90390201  | 0.973435137 |
| valeraldehyde | LA3959 | 1.1153 | 0.631187781 | 0.898759707 |
| valeraldehyde | LA3960 | 1.9217 | 0.035214471 | 0.240527414 |
| valeraldehyde | LA3961 | 1.4426 | 0.070741529 | 0.358508485 |
| valeraldehyde | LA3962 | 0.9688 | 0.84554847  | 0.965539339 |
| valeraldehyde | LA3963 | 1.8477 | 0.000832229 | 0.020372966 |
| valeraldehyde | LA3964 | 0.9813 | 0.900783786 | 0.973435137 |
| valeraldehyde | LA3965 | 1.2281 | 0.183506722 | 0.582511884 |
| valeraldehyde | LA3966 | 1.3431 | 0.278742891 | 0.699194146 |
| valeraldehyde | LA3967 | 1.4433 | 0.014616242 | 0.139590603 |
| valeraldehyde | LA3968 | 1.0456 | 0.749037518 | 0.931898617 |
| valeraldehyde | LA3969 | 1.3512 | 0.069465149 | 0.356649926 |
| valeraldehyde | LA3970 | 1.1199 | 0.762483081 | 0.938912768 |
| valeraldehyde | LA3971 | 1.4119 | 0.357377765 | 0.762755031 |
| valeraldehyde | LA3976 | 0.9266 | 0.806193775 | 0.953295916 |
| valeraldehyde | LA3977 | 0.9628 | 0.902927952 | 0.973435137 |
| valeraldehyde | LA3978 | 0.9464 | 0.796006992 | 0.948513004 |
| valeraldehyde | LA3979 | 0.9469 | 0.916640017 | 0.974606828 |
| valeraldehyde | LA3980 | 1.4356 | 0.012550964 | 0.127058158 |
| valeraldehyde | LA3981 | 1.8488 | 0.02465647  | 0.194162782 |
| valeraldehyde | LA3983 | 1.4202 | 0.155767532 | 0.541320603 |
| valeraldehyde | LA3984 | 1.3768 | 0.393608955 | 0.782614296 |
| valeraldehyde | LA3985 | 0.7016 | 0.497629729 | 0.844594188 |



|               |        |        |             |             |
|---------------|--------|--------|-------------|-------------|
| valeraldehyde | LA3986 | 0.8158 | 0.372313695 | 0.767708832 |
| valeraldehyde | LA3988 | 1.1615 | 0.413427622 | 0.79715723  |
| valeraldehyde | LA3989 | 1.6769 | 0.167980078 | 0.55831688  |
| valeraldehyde | LA3990 | 1.1167 | 0.629341073 | 0.898759707 |
| valeraldehyde | LA3992 | 0.6507 | 0.410239722 | 0.794012365 |
| valeraldehyde | LA3993 | 0.9419 | 0.872778576 | 0.970384791 |
| valeraldehyde | LA3994 | 1.3009 | 0.482763904 | 0.839381895 |
| valeraldehyde | LA3995 | 0.6325 | 0.004420055 | 0.060925082 |
| valeraldehyde | LA3996 | 1.2052 | 0.220681059 | 0.634940929 |
| valeraldehyde | LA3997 | 1.2682 | 0.526017158 | 0.858002401 |
| valeraldehyde | LA3998 | 1.1371 | 0.490157667 | 0.841212822 |
| valeraldehyde | LA3999 | 0.7415 | 0.140265786 | 0.516502172 |
| valeraldehyde | LA4000 | 0.9566 | 0.870451165 | 0.970339004 |
| valeraldehyde | LA4001 | 0.7867 | 0.378089982 | 0.771818109 |
| valeraldehyde | LA4002 | 1.5114 | 0.005075789 | 0.067530062 |
| valeraldehyde | LA4003 | 0.7908 | 0.183586415 | 0.582511884 |
| valeraldehyde | LA4004 | 1.4681 | 0.020380347 | 0.171801272 |
| valeraldehyde | LA4005 | 0.9226 | 0.661401523 | 0.90958877  |
| valeraldehyde | LA4006 | 1.0111 | 0.942337898 | 0.98245006  |
| valeraldehyde | LA4007 | 1.8552 | 0.001328405 | 0.027281338 |
| valeraldehyde | LA4008 | 2.1383 | 2.1203E-06  | 0.000158247 |
| valeraldehyde | LA4009 | 1.2386 | 0.262147696 | 0.681073935 |
| valeraldehyde | LA4010 | 0.6850 | 0.039951286 | 0.258697627 |

volatile correlation matrix

| metabolite            | 1-pentar | 1-penten | cis-2-per | 1-penter | pentanal | trans-2-p | 2-methyl | 3-methyl | 3-methyl | 2-methyl | 2-isobutyl | isovalerc | 2-phenyl | phenylac | benzalde | benzyl a | 6-methyl | geranyla | cis-3-he | hexyl alc | cis-3-he | trans-2-f | hexanal | beta-ion | 2-metho | isobutyl | methyl br |
|-----------------------|----------|----------|-----------|----------|----------|-----------|----------|----------|----------|----------|------------|-----------|----------|----------|----------|----------|----------|----------|----------|-----------|----------|-----------|---------|----------|---------|----------|-----------|
| 1-pentanol            | 1        | 0.533    | 0.589     | 0.489    | 0.665    | 0.422     | 0.486    | 0.448    | 0.306    | 0.243    | 0.444      | 0.263     | 0.28     | 0.21     | 0.368    | 0.337    | 0.478    | 0.373    | 0.521    | 0.491     | 0.369    | 0.412     | 0.515   | 0.276    | 0.082   | -0.09    | 0.045     |
| 1-penten-3-ol         | 0.533    | 1        | 0.73      | 0.513    | 0.708    | 0.398     | 0.331    | 0.183    | 0.164    | 0.248    | 0.084      | 0.063     | 0.086    | 0.182    | 0.286    | 0.222    | 0.09     | 0.188    | 0.482    | 0.267     | 0.509    | 0.519     | 0.387   | 0.372    | 0.125   | -0.083   | 0.146     |
| cis-2-penten-1-ol     | 0.589    | 0.73     | 1         | 0.551    | 0.722    | 0.381     | 0.598    | 0.493    | 0.424    | 0.348    | 0.239      | 0.163     | 0.129    | 0.207    | 0.394    | 0.195    | 0.032    | 0.158    | 0.364    | 0.171     | 0.498    | 0.491     | 0.385   | 0.383    | 0.057   | -0.149   | 0.007     |
| 1-penten-3-one        | 0.489    | 0.513    | 0.551     | 1        | 0.77     | 0.694     | 0.425    | 0.622    | 0.592    | 0.471    | 0.311      | 0.108     | 0.366    | 0.422    | 0.382    | 0.161    | 0.013    | 0.202    | 0.244    | -0.067    | 0.518    | 0.398     | 0.212   | 0.29     | 0.368   | 0.221    | 0.239     |
| pentanal              | 0.665    | 0.708    | 0.722     | 0.77     | 1        | 0.572     | 0.555    | 0.556    | 0.569    | 0.603    | 0.346      | 0.236     | 0.36     | 0.439    | 0.456    | 0.269    | 0.144    | 0.286    | 0.356    | 0.144     | 0.606    | 0.531     | 0.474   | 0.375    | 0.167   | 0.046    | 0.165     |
| trans-2-pentenal      | 0.422    | 0.398    | 0.381     | 0.694    | 0.572    | 1         | 0.365    | 0.549    | 0.503    | 0.475    | 0.274      | 0.203     | 0.251    | 0.259    | 0.31     | 0.195    | 0.127    | 0.136    | 0.365    | 0.1       | 0.488    | 0.557     | 0.288   | 0.174    | 0.133   | 0.134    | 0.26      |
| 2-methyl-1-butanol    | 0.486    | 0.331    | 0.598     | 0.425    | 0.555    | 0.365     | 1        | 0.739    | 0.693    | 0.665    | 0.413      | 0.451     | 0.179    | 0.236    | 0.483    | 0.216    | 0.088    | 0.151    | 0.29     | 0.088     | 0.519    | 0.34      | 0.358   | 0.201    | -0.095  | 0.031    | -0.065    |
| 3-methyl-1-butanol    | 0.448    | 0.183    | 0.493     | 0.622    | 0.556    | 0.549     | 0.739    | 1        | 0.951    | 0.602    | 0.547      | 0.508     | 0.302    | 0.307    | 0.444    | 0.167    | 0.131    | 0.168    | 0.13     | -0.081    | 0.445    | 0.33      | 0.258   | 0.162    | 0.008   | 0.135    | 0.02      |
| 3-methylbutanal       | 0.306    | 0.164    | 0.424     | 0.592    | 0.569    | 0.503     | 0.693    | 0.951    | 1        | 0.7      | 0.485      | 0.509     | 0.308    | 0.359    | 0.437    | 0.151    | 0.049    | 0.113    | 0.023    | -0.194    | 0.452    | 0.298     | 0.218   | 0.11     | 0       | 0.098    | -0.013    |
| 2-methylbutanal       | 0.243    | 0.248    | 0.348     | 0.471    | 0.603    | 0.475     | 0.665    | 0.602    | 0.7      | 1        | 0.289      | 0.286     | 0.399    | 0.426    | 0.463    | 0.289    | -0.093   | 0.016    | 0.063    | -0.172    | 0.439    | 0.266     | 0.199   | 0.135    | -0.012  | 0.064    | 0.083     |
| 2-isobutylthiazole    | 0.444    | 0.084    | 0.239     | 0.311    | 0.346    | 0.274     | 0.413    | 0.547    | 0.485    | 0.289    | 1          | 0.59      | 0.301    | 0.272    | 0.426    | 0.505    | 0.459    | 0.28     | 0.231    | 0.257     | 0.264    | 0.287     | 0.36    | 0.143    | 0.104   | 0.129    | 0.074     |
| isovaleronitrile      | 0.263    | 0.063    | 0.163     | 0.108    | 0.236    | 0.203     | 0.451    | 0.508    | 0.509    | 0.286    | 0.59       | 1         | 0.184    | 0.141    | 0.269    | 0.173    | 0.302    | 0.118    | 0.2      | 0.238     | 0.235    | 0.305     | 0.347   | 0.005    | -0.026  | 0.026    | -0.098    |
| 2-phenylethanol       | 0.28     | 0.086    | 0.129     | 0.366    | 0.36     | 0.251     | 0.179    | 0.302    | 0.308    | 0.399    | 0.301      | 0.184     | 1        | 0.788    | 0.434    | 0.411    | 0.166    | 0.211    | 0.074    | 0.021     | 0.182    | 0.129     | 0.101   | 0.224    | 0.244   | 0.084    | 0.213     |
| phenylacetaldehyde    | 0.21     | 0.182    | 0.207     | 0.422    | 0.439    | 0.259     | 0.236    | 0.307    | 0.359    | 0.426    | 0.272      | 0.141     | 0.788    | 1        | 0.476    | 0.446    | 0.132    | 0.285    | 0.1      | 0.033     | 0.303    | 0.269     | 0.176   | 0.247    | 0.315   | 0.159    | 0.323     |
| benzaldehyde          | 0.368    | 0.286    | 0.394     | 0.382    | 0.456    | 0.31      | 0.483    | 0.444    | 0.437    | 0.463    | 0.426      | 0.269     | 0.434    | 0.476    | 1        | 0.546    | 0.245    | 0.361    | 0.303    | 0.199     | 0.435    | 0.412     | 0.356   | 0.322    | 0.255   | 0.147    | 0.383     |
| benzyl alcohol        | 0.337    | 0.222    | 0.195     | 0.161    | 0.269    | 0.195     | 0.216    | 0.167    | 0.151    | 0.289    | 0.505      | 0.173     | 0.411    | 0.446    | 0.546    | 1        | 0.344    | 0.307    | 0.249    | 0.26      | 0.238    | 0.244     | 0.283   | 0.163    | 0.198   | 0.055    | 0.384     |
| 6-methyl-5-hepten-2-c | 0.478    | 0.09     | 0.032     | 0.013    | 0.144    | 0.127     | 0.088    | 0.131    | 0.049    | -0.093   | 0.459      | 0.302     | 0.166    | 0.132    | 0.245    | 0.344    | 1        | 0.732    | 0.529    | 0.627     | 0.267    | 0.308     | 0.509   | 0.089    | 0.064   | 0.072    | 0.199     |
| geranylacetone        | 0.373    | 0.188    | 0.158     | 0.202    | 0.286    | 0.136     | 0.151    | 0.168    | 0.113    | 0.016    | 0.28       | 0.118     | 0.211    | 0.285    | 0.361    | 0.307    | 0.732    | 1        | 0.502    | 0.514     | 0.339    | 0.334     | 0.426   | 0.356    | 0.229   | 0.284    | 0.431     |
| cis-3-hexen-1-ol      | 0.521    | 0.482    | 0.364     | 0.244    | 0.356    | 0.365     | 0.29     | 0.13     | 0.023    | 0.063    | 0.231      | 0.2       | 0.074    | 0.1      | 0.303    | 0.249    | 0.529    | 0.502    | 1        | 0.798     | 0.651    | 0.611     | 0.645   | 0.371    | 0.019   | 0.098    | 0.29      |
| hexyl alcohol         | 0.491    | 0.267    | 0.171     | -0.067   | 0.144    | 0.1       | 0.088    | -0.081   | -0.194   | -0.172   | 0.257      | 0.238     | 0.021    | 0.033    | 0.199    | 0.26     | 0.627    | 0.514    | 0.798    | 1         | 0.284    | 0.474     | 0.67    | 0.257    | 0.049   | 0.086    | 0.274     |
| cis-3-hexenal         | 0.369    | 0.509    | 0.498     | 0.518    | 0.606    | 0.488     | 0.519    | 0.445    | 0.452    | 0.439    | 0.264      | 0.235     | 0.182    | 0.303    | 0.435    | 0.238    | 0.267    | 0.339    | 0.651    | 0.284     | 1        | 0.735     | 0.73    | 0.329    | 0.057   | 0.106    | 0.22      |
| trans-2-hexenal       | 0.412    | 0.519    | 0.491     | 0.398    | 0.531    | 0.557     | 0.34     | 0.33     | 0.298    | 0.266    | 0.287      | 0.305     | 0.129    | 0.269    | 0.412    | 0.244    | 0.308    | 0.334    | 0.611    | 0.474     | 0.735    | 1         | 0.73    | 0.308    | 0.169   | 0.193    | 0.362     |
| hexanal               | 0.515    | 0.387    | 0.385     | 0.212    | 0.474    | 0.288     | 0.358    | 0.258    | 0.218    | 0.199    | 0.36       | 0.347     | 0.101    | 0.176    | 0.356    | 0.283    | 0.509    | 0.426    | 0.645    | 0.67      | 0.73     | 0.73      | 1       | 0.28     | 0.044   | 0.056    | 0.205     |
| beta-ionone           | 0.276    | 0.372    | 0.383     | 0.29     | 0.375    | 0.174     | 0.201    | 0.162    | 0.11     | 0.135    | 0.143      | 0.005     | 0.224    | 0.247    | 0.322    | 0.163    | 0.089    | 0.356    | 0.371    | 0.257     | 0.329    | 0.308     | 0.28    | 1        | 0.165   | 0.241    | 0.339     |
| 2-methoxyphenol       | 0.082    | 0.125    | 0.057     | 0.368    | 0.167    | 0.133     | -0.095   | 0.008    | 0        | -0.012   | 0.104      | -0.026    | 0.244    | 0.315    | 0.255    | 0.198    | 0.064    | 0.229    | 0.019    | 0.049     | 0.057    | 0.169     | 0.044   | 0.165    | 1       | 0.454    | 0.519     |
| isobutyl acetate      | -0.09    | -0.083   | -0.149    | 0.221    | 0.046    | 0.134     | 0.031    | 0.135    | 0.098    | 0.064    | 0.129      | 0.026     | 0.084    | 0.159    | 0.147    | 0.055    | 0.072    | 0.284    | 0.098    | 0.086     | 0.106    | 0.193     | 0.056   | 0.241    | 0.454   | 1        | 0.555     |
| methyl benzoate       | 0.045    | 0.146    | 0.007     | 0.239    | 0.165    | 0.26      | -0.065   | 0.02     | -0.013   | 0.083    | 0.074      | -0.098    | 0.213    | 0.323    | 0.383    | 0.384    | 0.199    | 0.431    | 0.29     | 0.274     | 0.22     | 0.362     | 0.205   | 0.339    | 0.519   | 0.555    | 1         |
